# Supplementary material for: Spatial-transcriptomics reveals unique defining molecular features of 5-aminolevulinic acid+ infiltrative tumor cells associated with glioblastoma recurrence and poor survival
Source: Research Square preprint supplement (doi:10.21203/rs.3.rs-780275/v1), 2021-08-04
Supplement: Supplementary file 1 [file Supplementary table 1.xlsx]

## Sheet: Clinical Info
Tissue sample number & region	Histology	% of 5ALA+ cells	IDH-1	ATRX	MGMT status (percentage methylated)	Date of Surgery	Tumour Site	Resection Status	Treatment (radio/chemo)	Alive	Survival (months)	6 Month Survival	12 Month Survival	Age	Sex
Patient 27	GBM	1.25	WT	WT	75	2015-10-22	Right temporal	0.99	60Gy/Temozolomide	Yes	61.2	Y	Y	30	F
Patient 28	GBM	2.6	WT	WT	0	2016-01-21	Right frontal	0.98	Best supportive care (BSC)	No	3	N	N	71	M
Patient 29	GBM	2.9	WT	WT	0	2016-01-28	Left frontal	1	60Gy/Temozolomide	No	39.6	Y	Y	67	F
Patient 30	GBM	1.1	WT	WT	0	2016-02-18	Left frontal	1	Best supportive care (BSC)	No	9.3	Y	N	53	M
Patient 31	GBM	2.4	WT	WT	0	2016-03-09	Right temporal	1	60Gy/Temozolomide	No	16.1	Y	Y	57	F
Patient 33	GBM	1.5	WT	WT	0	2016-05-26	Right parietal	1	Unknown	No	11.6	Y	N	70	M
Patient 34	GBM	1	WT	WT	0	2016-06-13	Left parietal	1	60Gy/Temozolomide	Yes	59.3	Y	Y	33	M
Patient 37	GBM	1.25	WT	WT	0	2016-10-20	Right parietal	1	60Gy/Temozolomide	No	12	Y	N	63	F
Patient 38	GBM	1	WT	WT	0	2016-11-10	Right frontal	1	60Gy/Temozolomide	No	5.9	N	N	69	M
Patient 40	GBM	0.9	WT	WT	0	2016-11-24	Right frontal	1	30Gy	No	7.2	Y	N	44	M

## Sheet: Cahoy et al 
Neuron_Cahoy et al	Oligodendrocytes_Cahoy et al	Astrocytes_Cahoy et al	Cultured astroglia_Cahoy et al
NEUROD6	MOG	GFAP	IGFBP3
GLRA2	MOBP	AQP4	AKR1C14
NOV	9630013A20RIK	PLA2G7	SPP1
PRDM8	AI314604	SLC39A12	ANXA3
SLA	UGT8A	MLC1	ANXA1
CRH	A330104H05RIK	AU067665	CFH
GABRG2	ENPP6	DIO2	OGN
HTR2C	CLDN11	SLC14A1	FBLN5
HS3ST2	9530066K23RIK	ALDH1L1	1500015O10RIK
MAL2	MAG	CYP4F14	STMN2
9130024F11RIK	PLEKHH1	ALDOC	NDRG1
EFCBP1	GM98	TTPA	THBS1
STMN2	TMEM10	ACSBG1	CP
GABRA5	FA2H	CHRDL1	SHROOM3
NTS	SGK2	GM266	CDC2A
A130090K04RIK	IL23A	SLC4A4	CD24A
GABRA1	6330530A05RIK	SLC1A2	PRSS23
SATB2	EDG8	SLC25A18	NDRL
GPR88	MBP	SLC1A3	LOX
SYT1	TRF	F3	CNN2
4930544G21RIK	GPR62	PPP1R3G	KLHDC8A
GDA	TSPAN2	CYP4F15	IFITM1
MYT1L	MAL	1500005I02RIK	ASNS
SLC17A6	ERBB3	FZD2	TOP2A
A930034L06RIK	ADAMTS4	2900019G14RIK	MATN2
A930009L07RIK	ELOVL7	MERTK	FMOD
NPAS4	PPP1R14A	VIL2	HSPB1
CALB1	PLP1	TMEM166	CEP55
SLC12A5	PLXNB3	GJB6	GPR126
EPHA7	A230069A22RIK	HAPLN1	COL8A1
VIP	GAL3ST1	RFX4	CRABP1
MEF2C	BCAS1	PAPSS2	AURKB
SSTR2	SRPK3	SLC15A2	AKAP12
ODZ2	GJA12	PPP1R3C	TNFRSF12A
PCSK2	1700047M11RIK	TLR3	SOSTDC1
SNAP25	CPM	ACOT11	EMP1
SCG2	EVI2A	ATP1A2	PBK
PGM2L1	PLA2G4A	BMPR1B	S100A11
PLCXD3	GSN	C030045D06RIK	CRLF1
DLX1	PRKCQ	PRODH	9930013L23RIK
VSNL1	SEMA3D	GLI3	TAGLN
SYT4	GALNT6	TMEM47	CASQ1
NRG3	PDLIM2	SLC9A3R1	ANXA2
SCN2A1	RFFL	CTH	TFPI
ICAM5	GPR17	NTSR2	CCDC109B
KCNF1	4930452G13RIK	SLC7A10	TGM2
AI838057	HAPLN2	VCAM1	IGF2BP2
CCK	GJB1	FGFR3	AI838057
VGF	SFT2D1	CCDC80	COL3A1
TMEM130	LGI3	ENTPD2	LGALS1
CAMK4	NKX6-2	CYBRD1	ECM1
ASPH	SOX10	KCNE1L	ECT2
C030017B01RIK	EDG2	BC029169	C1QL3
SLC6A7	ADSSL1	AI464131	TUBA1C
OLFR1344	GJE1	EG328479	GRB10
ICA1L	SLC45A3	TNC	BMP6
MYO5B	ANLN	TLCD1	COL5A2
NELL1	TNNI1	EDG1	EPHB2
NEFM	8430436F23RIK	CBS	UBE2C
NEFL	PLLP	PBXIP1	OCIAD2
TTR	CYP27A1	GRIN2C	SEMA3C
6330527O06RIK	KNDC1	A730056I06RIK	MMP2
CDH8	DOCK10	ADHFE1	NUAK1
SV2B	BB120497	AGT	NPR3
GAP43	4833411O04RIK	GLDC	CKS2
TRHDE	5730559C18RIK	SLC7A2	6330512M04RIK
D11BWG0517E	E130308A19RIK	BC055107	PMAIP1
CAMK2B	CHN2	GJA1	CCNB1-RS1
PENK1	IL1RAP	PDK4	SAMD9L
RGS4	ST18	EGFR	IFI35
LPL	2810468N07RIK	SOX9	BACE2
CACNA1B	C030030A07RIK	CLDN10	MELK
KCNC2	MYO1D	PLCD4	CCND1
TTC9	CPOX	ID4	TGFBI
L1CAM	PPAP2C	FMO1	PTGS2
9130430L19RIK	CNP1	EMP2	ST8SIA2
CLSTN2	UNC5B	LONRF3	CCNB2
NAPB	DDC	HTRA1	2810417H13RIK
CYB561	TRIM59	MGST1	CKAP2
CXADR	PHLDB1	THRSP	GAS2L3
HPCA	BFSP2	HSD11B1	SPBC25
CNKSR2	BMP4	LGI4	EDG3
UNC13A	MATN1	ITGB5	GM879
GTL2	TMEFF2	AIFM3	COL5A1
C1QTNF4	RNF122	AXL	SERPING1
CBLN1	ICK	ADORA2B	CALD1
BRUNOL4	ARPC1B	CBR3	TSPAN17
RHOV	NFASC	HOD	MKI67
EFNA3	CNTN1	EPHX2	NOV
HS6ST2	CLDN14	SLC27A1	NES
GRP	2210011C24RIK	2610034M16RIK	ADM
SOSTDC1	CAR14	SCARA3	AHNAK
STX1A	SLC12A2	CYP2D22	TMEFF2
A2BP1	LIMS2	OAF	C1QA
CD24A	LOC544710	1700027L20RIK	SLCO1A4
KCNQ2	TMEM182	2900052N01RIK	PAK3
BCL11A	DCT	NR2E1	CTGF
ELAVL2	HHIP	PDLIM4	H19
NPTX1	KCNA1	MAMDC2	D17H6S56E-5
SST	D230025D16RIK	CD38	SEMA3E
COPG2AS2	E330034G19RIK	LRIG1	SULF1
ENO2	EG626058	PRDM16	PLA2G4A
3110047P20RIK	TMEM63A	NAPRT1	INTS6
CALN1	BACE2	TNFAIP8	CYP1B1
2010300C02RIK	TMEM141	GDPD2	PRC1
SERTAD4	PCTK3	PHKG1	BGN
KCNV1	JOSD2	GSTM1	LASS6
BRUNOL6	TMEM163	RGS20	FRMD3
ATP1A3	SLC44A1	ABCD2	MKX
CKMT1	GPR37	MYOC	TRIM30
D3BWG0562E	GRIK5	A830059I20RIK	TSPO
NAP1L2	BMF	LCAT	TMSB10
6330417G04RIK	2600010E01RIK	HES5	LGALS3
DOC2A	6330503K22RIK	SDC4	SHCBP1
CORO1A	MAP6D1	CYP4V3	MOXD1
TRHR	TMEM2	STK17B	A2M
SLC32A1	ILF2	NOPE	ARVCF
GNG2	PPP1R16B	FGFBP3	VGF
SYNGR3	ASPA	4631416L12RIK	CCNA2
SLC10A4	9030409G11RIK	EMX2	BIRC5
LDB2	OTUD7B	IL33	OSBPL3
AAK1	EML1	RBPMS2	SLC6A15
RYR2	3110001I20RIK	SLC13A3	TM4SF1
SLC7A8	RAP1A	TCFCP2L1	OLFML3
NTNG1	GLTP	NRARP	UGT1A6A
ERC2	ELOVL1	PLA2G3	COL11A1
4930551E15RIK	5430435G22RIK	SULT1A1	PLCXD1
SERPINI1	ARSG	ID3	TUBB6
CAMKV	RHOG	BAALC	MSRB3
FXYD7	ELL2	EGFL6	BUB1
CDK5R1	MAN1A	ACSS1	PDLIM2
SEMA3C	ATP10B	MYOM3	FSCN1
B230310J22RIK	B230215L15RIK	APOE	ACTN1
BC026657	ARHGEF10	RSPO1	UCHL1
SLC4A10	APOD	SELENBP1	SLC7A8
PNMA2	SH3GL3	DAPP1	C1QC
ZFP804A	WDR26	E130114P18RIK	SPATA6
NPTXR	CLGN	TNFRSF19	CDCA8
SCN2B	TMEM16D	TRIM9	PPM2C
LBA1	RTKN	CYP7B1	VIM
ABLIM3	GAMT	SERPINF1	ADA
1700021K10RIK	NKX2-2	SLC13A5	SDC1
GABPB2	SEMA5A	PAX6	BCAT1
NRIP3	PCDH9	P4HA3	1300014I06RIK
NEUROD1	KLHL4	SELENBP2	CXCL12
TAC2	PRAMEL3	ALDH1A1	CYP39A1
2310046A06RIK	XRCC3	ACSL6	NUSAP1
CNTNAP4	MCAM	SOAT1	TAGLN2
N28178	MTAP7	AGXT2L1	FN1
GPR12	NINJ2	FOLH1	TRIP13
PACSIN1	TRIM36	4732466D17RIK	ASS1
BCL11B	FBXO32	MFGE8	CENPF
GAD1	2310047D13RIK	SERHL	RAB27B
SEMA3A	C920006O11RIK	4933416E14RIK	CENPA
PPFIA2	GRB14	GRM3	1110032E23RIK
SLC8A1	A930009A15RIK	LXN	LAMB1-1
GPR22	IL12RB1	MMP14	ST6GALNAC2
D10BWG1379E	COL20A1	KLF15	FKBP5
RUNX1T1	2900041A09RIK	DMP1	CCNB1
GFRA2	PARVB	CEBPD	AKAP2
PTPRK	CNKSR3	ELOVL2	5133401H06RIK
ATP2B3	COLEC11	NDPH	BUB1B
RSPO2	LDLRAP1	ASPH	6030443O07RIK
RASGEF1A	JAM3	FXYD1	SERPINA3N
EGR3	RASGEF1B	GLIS3	RAD51
AW551984	TMOD1	SLC30A10	COL18A1
CX3CL1	GNG8	AMOT	SLCO3A1
CRMP1	YPEL2	AOX1	FRMD5
SCN1A	CRYAB	4930534B04RIK	MAF
FBXO7	2021-09-04	SLC1A4	IFI205
HPCAL4	INSC	PPP1R3D	CAPG
AI848149	TMEM159	DDAH1	JUB
BRUNOL5	SNX6	1700019G17RIK	RAI14
CBLN4	SYNJ2	PDPN	GPR85
FABP3	UST	FJX1	KCNF1
PFKP	WIPF1	CROT	FIGNL1
TBR1	RRAS2	FKBP10	MCM2
EPHA3	BB078305	FBXO2	MYADM
KALRN	NDRG1	CLU	PCOLCE
NRXN3	ALOX5	THBS4	D2ERTD750E
DYNC1I1	C1QA	IGSF1	CKS1B
GPR6	PLEKHA2	SMO	LBP
SYP	PIGA	PRKCM	IFITM3
RASL10A	LITAF	TMEM51	PAWR
NTF3	4632411J06RIK	NTRK2	GPX1
OLFM3	1200004M23RIK	2810459M11RIK	MYH9
PAK6	EPB4.1L3	MT2	CYP26B1
HECW1	MGP	CYR61	ATP1A1
ADD2	MICALL1	CXCL14	ALDH1A2
PRMT8	PHLDA3	1200009O22RIK	TSPAN4
9330121K16RIK	TSPAN15	PYGB	PDLIM1
ADCY1	1700012A16RIK	SLC38A3	PDLIM7
LMO3	SMAD7	GEM	TRIM59
4930505D03RIK	SIRT2	KCNJ16	USP18
SLC6A17	CCNYL1	NOTCH2	SYTL2
SYT16	ST6GALNAC3	LIX1	ITGA3
UNC5D	PACS2	MAOB	KIF20A
ITPKA	LECT1	PLD2	GGTA1
CDC42	2700046A07RIK	NDRG2	PLP2
SPOCK1	SRD5A1	RORB	SLC25A24
RASGRF1	ENPP2	MCC	C79407
DIRAS2	ZDHHC9	GALNT4	PTRF
GJA9	BIN1	GABRG1	LOXL2
KCNS2	SYTL2	LRP4	C730049O14RIK
GABRB3	1110007C09RIK	FADS2	GCNT2
LMO7	TACSTD1	HEPH	3110003A17RIK
PCDHA4	DBNDD2	SLC6A11	COLEC12
LIN7B	ACSL1	ATP1B2	ITGA1
CPNE4	PYCR1	SFXN5	CENPE
ENC1	PTTG1	PLXNB1	POSTN
PRKCC	ZFP536	SMPDL3A	PDE1A
EG636791	SERINC5	VIT	OASL2
LGI2	PIK3R3	LHX2	CAST
SULT4A1	2610200G18RIK	SARDH	HSPB8
C130038G02RIK	TMCC3	ZFP36L2	S100A10
KCNAB1	LASS2	GPC6	LOC675405
ST8SIA4	CTSS	TPH2	PRKAR1B
A830036E02RIK	MITF	FGFR1	FIGF
SYN2	LHFPL3	NCAN	CNTF
TCRB-V13	GSS	UPP1	RBP1
MPPED1	GM237	GPLD1	NPNT
BHLHB5	PTPRD	KCNN2	OLFM2
SCN3B	EMILIN2	RNF182	MCM5
FGF9	SLC24A2	ITGA7	CTNNAL1
SNCA	BRCA1	CML1	CDKN2B
SLC2A3	LRRN1	KCNK1	RRAS2
C77370	LCORL	EFEMP1	BF642829
RELN	OPCML	MFAP3L	1500009L16RIK
PDE10A	SUSD5	1110020G09RIK	MYO1D
SNRPN	E2F8	DMRTA2	DTL
CCKBR	CAPN5	CD44	SPINT2
PRKAR1B	CDC42EP2	KCTD14	SGK
1810015A11RIK	A230106M20RIK	NUPR1	PTPN14
9930013L23RIK	4632404H22RIK	GLUL	CDKN1A
C030019I05RIK	2021-09-07	ACAA2	5930437A14RIK
RAMP3	5330421F07RIK	SORCS2	RRM2
CACNA2D3	HN1L	SLC2A10	B3GALNT1
NRGN	TES	TST	ACOT10
6330405H19	PDGFRA	OPLAH	TBX18
CLSTN3	KLK6	FRMPD1	PLEKHA2
CAMTA1	AYTL1	PPIL6	EHD4
2021-09-06	AATK	2310005E10RIK	DAP
CDH9	PRKCZ	AK3L1	9930012K11RIK
HTR1B	MATN4	GPC4	B3GNT5
CXCL12	9530059O14RIK	EYA1	CDK6
ST8SIA2	RAB33A	DDR2	ACOT9
D130043K22RIK	NDRL	ITGA6	MCM6
SLC7A14	PTPRE	PTPRZ1	ARPC1B
GRM7	RIMS2	GLUD1	CTSS
DPP10	ANK3	IGFBP2	HMOX1
CCL27	ZDHHC14	NPL	CDT1
MATK	3632451O06RIK	4930423H22RIK	FLNB
PCP4	PDE8A	SEMA4B	MPP1
RIAN	PUS7	LPP	COL6A1
DRD1IP	AA536743	CML4	GPR64
AU067824	BB125219	SLCO1C1	2610528G24RIK
3526401B18RIK	TNS3	MDFIC	MSN
SLC6A15	AW456874	GULP1	CKAP2L
CHGB	NOD1	9330182L06RIK	BC006779
AW060394	PSTPIP2	AI449310	CDON
LY6H	CLIC4	FGD6	LPGAT1
1500031I19RIK	SETD8	DDO	AW112037
PCDHA1	TMOD2	PAQR8	KIF23
NSG2	OLIG2	TGFB2	EMP3
2310010M24RIK	ENPP4	BCL2	6230424C14RIK
DGKG	GM410	RDH5	CTPS
LOC554327	ZFP365	PRDX6	FOXD1
KCNQ5	TMCC2	CHI3L1	9430020K01RIK
SCN3A	SLC22A21	PDE4B	COL1A1
HS3ST5	D16ERTD472E	AKT2	LIN7A
RNF165	2210010A19RIK	GPR56	DBF4
ACHE	CD82	WNT7A	CD99
VSTM2	2700055K07RIK	SUCLG2	TPX2
KCNIP4	SLAIN1	PNP	SORCS1
TUBB3	SH3BP4	BC064078	VGCNL1
1500016O10RIK	PLEKHA1	ABCA1	GBP2
KCNA4	TPD52	EYA4	ARHGAP29
TMOD3	TMEM123	PHKA1	MAN1A
A830018L16RIK	POLR3E	EDNRB	C1QB
CPLX1	AI790298	CCND2	CCBE1
ARPP21	TULP4	CAR5B	ADAMTSL3
LASS6	TUBB4	A2M	TPM1
RAB15	AGPAT4	IL11RA1	FOSL2
3110006E14RIK	5031439G07RIK	DNAIC1	LRRFIP1
A830006F12RIK	SHC4	CELSR1	ANXA4
RAB3C	4921505C17RIK	DDIT4L	ELK3
SLCO5A1	BC011467	PTGER4	BC065085
PCDHA11	GSTO1	RNF180	2210010L05RIK
ISL1	TM7SF3	IL17RD	PLA1A
ADCY7	BACE1	2310016C16RIK	TTK
COL19A1	D8ERTD82E	2610024B07RIK	NEXN
ACTL6B	TMEM108	IGFBP5	UHRF1
ELAVL4	CTSK	C030019F02RIK	LOC215866
NETO1	ENDOD1	PRKCDBP	TGFB1I1
FHOD3	RTN4	PACRG	ARID5B
CCBE1	DUSP9	DCAMKL1	ICAM1
CALB2	C1QB	CYP2J9	GSN
FKBP1B	NCAM2	APPL2	DUSP14
GRIN1	PLCL1	GAS1	LOXL1
MCTP1	CDR2	ANGPTL4	COL6A2
B230209C24RIK	1810041L15RIK	PYGM	KCTD10
AI593442	DMRTA1	OLFML1	RAB32
DDN	EFS	SREBF1	TMEM45A
EPB4.9	NUDT4	SAT1	RGS16
C730029A08RIK	GAB1	COL4A5	SERTAD4
SYNPR	DYNLL2	A130022J15RIK	UACA
B230343J05RIK	ANKS1B	GPC5	IFIT2
CYP4X1	A930037G23RIK	HEPACAM	PLK1
AW555464	C1QC	DMT2	ABCG2
NPR3	COL9A3	NUF2	FZD5
NXPH2	ITGB4	NQO1	9130404D14RIK
CALCA	DOCK5	HEY2	AGPAT4
OLFM1	6330416G13RIK	PALLD	CD59A
FOXP1	FRMD5	TSPAN7	LASS4
PCDH21	SEMA4D	BMPR1A	ACTA2
TMSB10	SFT2D3	IRAK2	CDR2
CDKL2	MPZL1	LOC552874	LRRK1
RASSF5	NRM	ASAHL	MTAP1B
GRB10	SOX8	SPAG5	ARHGAP11A
AI851790	SLC1A1	MTMR11	IIGP2
AJAP1	LIMA1	MT3	SDPR
ISLR2	CCDC89	ID2	RACGAP1
ARG2	QPCT	TCFAP2C	ASPM
TAC1	KLHL2	BC065085	GLYCAM1
ARHGDIG	ELOVL6	ATP13A4	CCNG1
REPS2	CHST8	PAQR7	PLEKHG2
SYT7	B930006L02RIK	GSTA4	MRPS6
LOR	PLK3	GYK	CYB561
DSP	CLDND1	C77713	4930431B09RIK
SSTR4	AI854107	SLC36A2	CYB5R3
GM879	2021-03-08	HES1	EHD2
FOXP2	PCDH7	PXMP2	SLC16A12
RUSC1	FUT10	ELF5	OSMR
INA	NMRAL1	CDC42EP4	CDCA3
PRKCE	TSPAN17	VAV3	ROCK2
CNTNAP2	BC030863	1110054M08RIK	NEK2
LGI1	RSF1	LAMB2	TBC1D2B
C230098O21RIK	LOC665155	BMPER	KIF2C
6430502M16RIK	C230093N12RIK	LGR4	CORO1C
PDE1A	CENTG2	PNPLA7	INCENP
2010107G23RIK	TMEM117	FZD1	CLIC1
LIN7A	6330417G02RIK	ARRDC3	TRO
CNTN4	STXBP6	TIMP3	F2R
KCNT2	A230009B12RIK	CAR8	SGOL2
USP29	NFE2L3	MT1	MGP
PPM2C	CARHSP1	2900078C09RIK	GRB14
5330410G16RIK	4833420G17RIK	2310068J10RIK	GRIA3
CHGA	SLC6A8	RFTN2	ARHGEF5
NOS1AP	A930008G19RIK	BB176347	PTPLAD2
B3GALNT1	ANKRD28	NOTCH3	PHLDA3
TSPYL5	DDR1	2810455D13RIK	TMEM108
PTPRN2	A030007L17RIK	ID1	LMNA
BAIAP2	PLEKHB1	MEGF10	FLNA
AW490526	SNX15	CHD9	H2-D1
CHRNA7	SOX11	LOC669660	SORBS2
RAB9B	ANKRD13A	D11ERTD18E	NID1
LEFTY2	TMEM98	TPBG	4930506M07RIK
PTGER3	9330159K06	CIDEB	A830007P12RIK
PDE2A	PADI2	2610017I09RIK	H2-L
DCX	MAN1C1	DHTKD1	AP1S3
GA17	CTNNAL1	FABP7	AURKA
ZCCHC12	AB182283	WRNIP1	S100A6
EHBP1L1	ABTB2	CDC14A	C330027C09RIK
KCNC1	PCYT2	5930412G12RIK	BICC1
C230078M08RIK	STX2	AASS	GPC4
CADPS	VCAN	MRAS	UNC5B
NRSN1	CHES1	LOC624168	HN1L
9330109K16RIK	STK39	PPAP2B	4631426J05RIK
PLA2G4E	SEMA6A	DMD	DCN
AMN	D15WSU75E	VNN1	ADCY7
PLCXD1	HOOK3	GLYCAM1	ANLN
OPRL1	ITPR2	E030031F02RIK	1810015C04RIK
CPNE6	5330426P16RIK	ADK	ARHGAP6
CHD5	FOXK1	VEGFA	ENC1
1110006E14RIK	GNPTAB	SLC41A1	CD44
NPY1R	LAPTM5	GNA13	1300007C21RIK
GPR83	SPNB2	RETSAT	CLSPN
CELSR3	4933417O08RIK	GM715	CCDC3
RESP18	ERBB2IP	DKK3	CETN4
JPH4	1810033M07RIK	E230025E14RIK	AU020206
SSBP2	TMEM151	B930007P11RIK	AI788777
TRFR2	TALDO1	PPARA	GTL2
0710005M24RIK	RNF130	T2BP	TGFBR2
FSTL5	PEX2	NFKBIZ	MXRA8
CYP11A1	BIRC2	E430002G05RIK	PALLD
RBP4	PLAT	ACADL	MPHOSPH1
CDS1	CYP3A13	MAPKAPK3	MAL2
MYADM	ANKRD44	6330418B08RIK	IFITM2
GDAP1	SPG20	TOM1L1	RIN1
RIT2	HERC5	NEDD9	KIF22
GPRIN3	KIF1B	0610031J06RIK	WNT5A
DISP2	TGFA	LTB4DH	CPNE8
HCN1	TTYH2	PON2	H2-K1
AK5	LRRC62	SORBS1	SSTR2
NOL4	ZFP101	RASA2	OSBPL5
RASGRP2	PLEKHG3	DTNA	RYBP
STX3	MOBKL2B	SPIRE1	NEK6
PCLO	SHMT1	MYO10	CRYAB
NHLH2	A130014A01RIK	DAAM2	WNT9A
OCIAD2	TRIM13	GPAM	BC026657
LINGO1	EBP	4933404M19RIK	SPATA13
RUTBC2	STRN	MASP1	E2F8
UCHL1	DEPDC1B	ITSN1	GAP43
SYNGR1	EDG7	IDS	UGT1A9
ADCYAP1	SH3TC2	SDSL	1110008P14RIK
GM1337	GPD1	ALDH7A1	CDH22
HOOK1	FYN	MAMDC1	2900011O08RIK
CCDC109B	RGNEF	AW550831	CDC20
2410066E13RIK	HEATR3	CTSC	RBMS3
NSG1	ANKRD15	GPR23	TUBB5
C630007B19RIK	LOC669460	PSD2	LUM
ATP6V1G2	E330009J07RIK	CHST2	CENPP
TRIM37	CDS2	DHRS3	EPB4.1L3
SOCS2	RASSF8	ANKRD29	LPL
NDNL2	LCOR	2310040A07RIK	LTB4DH
VPS13C	PRICKLE1	2010011I20RIK	ETS1
LRFN5	TMBIM1	BCAR3	STAT6
PLCXD2	5430416G10RIK	CMTM3	FCGR3
KCNMA1	TJAP1	GLT25D2	PVR
B230112P13RIK	TMEM170	MAPK4	ELOVL7
TMEM179	SRP54	CSPG5	ANTXR2
1700054N08RIK	URM1	1110059G02RIK	CENPK
STMN3	IGF2BP2	HBEGF	MXRA7
A330019N05RIK	TTLL7	AGL	RTP4
TRIM46	CLN8	AMIGO2	BC039210
PPP3CB	RFTN1	CHSY1	ITGB1
A830007L07RIK	GSTM7	ST6GALNAC5	H2-T23
GRIA4	4933439C20RIK	PDGFRL	PTX3
NSF	RBKS	DPY19L3	AI413331
SLITRK1	SLC4A2	TRPS1	ZYX
5330417C22RIK	SLC35B2	6332401O19RIK	KLHL21
DPYSL5	KLF13	C4B	BEX1
BC062109	BCAR1	AI425999	COL1A2
LAMB1-1	TMPRSS5	2310005P05RIK	ADAM12
GREM2	ABL1	IDH2	NTNG1
CACNA1A	MMP2	GPRC5B	HN1
A830039N20RIK	SCARB2	GBP6	RNASE4
CAR10	2021-09-08	VEGFC	PLCE1
KRT222	SUSD4	ITIH5	EMB
MLSTD1	KIF26A	ACOT2	TK1
KIT	1190007F08RIK	CD302	PLK4
CACNA1E	CDC37L1	TXNIP	5830408B19RIK
NDRG4	DSCAML1	PTX3	RPRM
RTN4RL1	CDC2L6	YAP1	CTSH
SYNE1	EFNB3	E130304F04RIK	ELL2
A030009H04RIK	EPN2	SSFA2	HMMR
HCFC1	SYT11	PARP3	GPRK5
PGBD5	SYPL	C1QTNF5	SLC25A30
ARHGEF7	GAS7	PYGL	2310014D11RIK
ZFP533	WDR68	GDF10	MYL9
RPRM	AW228836	PPARGC1A	ISLR
CAMK2A	RGS16	CCDC90A	TBC1D8B
FIGF	SYDE2	SPARCL1	DTX3L
JAZF1	SULF2	1200009F10RIK	HIST1H2AO
2900055J20RIK	USF2	TPRKB	EPB4.1L4A
CAMKK2	SNX30	NHSL1	IFIH1
SYN1	ITGB7	TOR3A	NT5DC2
CDC42EP3	ZFPM1	DECR1	4833416E15RIK
KCNH1	DIXDC1	1810021J13RIK	AI848149
ARHGAP15	1110003F05RIK	CRISPLD2	IGTP
SPINT2	TMEM58	GHR	ITPR1
DCN	HPS5	1810014B01RIK	CALML4
EFNB2	PLD1	METRNL	ANGPT2
MTAP4	FNTB	ADCYAP1R1	WDR78
SIPA1L1	ME2	FZD7	PPAP2C
SLITRK4	DNAJB10	RAPGEF3	P4HA3
TRIM67	USP30	BC025076	JAZF1
IL1RAPL2	DSCAM	LOC665139	LONRF1
TASP1	SLK	2021-09-09	CLTB
TM6SF1	LSS	RLBP1	SFRP1
NXPH3	BCAT1	GM967	RND3
GRIA1	SYNGR2	FNDC5	SIPA1L1
SLC25A22	RAP2A	PELI2	TEX15
ARHGAP6	NT5E	ARSK	PTBP1
C530008M17RIK	CASR	WWTR1	HELLS
ASNS	MLSTD2	ABHD1	CSRP2
MAP3K9	ARHGAP23	CST3	PCBP3
B3GALT2	6030408C04RIK	ACOT1	PHLDB2
FBXO41	1300014I06RIK	OSMR	SHB
ELMOD1	2810410L24RIK	BCDO2	TMEM74
STK32C	BC031353	FBXO30	AW555464
RPRML	SLC15A4	DHRS4	TLE3
PRSS12	CYP51	GPT1	8430436O14RIK
C030002B11RIK	C130057M05RIK	ARHGAP5	SLC16A4
SYT5	SP7	ETV5	CAV1
DARC	CDR2L	MMD2	SAMD12
REM2	4930504E06RIK	ZNRF3	ZWINT
KLHDC8A	TYRO3	ANGPT1	TIMP2
ATP2B2	TRIP11	NMI	8430436F23RIK
MYO1B	5830482F20RIK	DBP	A230058F20RIK
HRK	CDC42EP1	COX4NB	LATS2
BASP1	FBXO7	RORA	EFEMP2
TMHS	PPP1R13L	USP53	FBLN2
CPLX3	TCBA1	TULP3	PSRC1
NPY2R	TCF7L2	PLCE1	SMAD7
CADM3	3222402P14RIK	PTPLAD2	1500005K14RIK
AF529169	NDNL2	TPCN1	4921524J06RIK
MYH3	HIST1H2BC	BHLHB2	ME2
A730054J21RIK	VPS37A	RDH10	PARP3
SPNB3	HS3ST1	FGFRL1	DIXDC1
DNM1	PCBP4	FARS2	BID
BTBD4	DNM2	6030451C04RIK	NT5E
GPR135	SFTPC	VCL	CTTN
RGS7BP	HIST1H2BE	PRRX1	ATP10A
TTC9B	5730420B22RIK	TIMP4	HK2
SMS	PPFIBP1	SCG3	A230083H22RIK
LY6E	FBN2	ZFP703	CYB5R1
AI314027	CC2D1B	SCD1	2210011C24RIK
GPR39	THBS3	PDGFD	4933426M11RIK
6430514L14RIK	TIMP2	LFNG	CD200
ITPR1	DOCK9	SLC7A11	3110050N22RIK
STXBP1	PDK3	STARD8	KIF11
FGF14	2400009B08RIK	4833409A17RIK	TMSB4X
GNAL	GNA12	DBX2	TAX1BP3
MLLT11	GTLF3B	CNN3	TCF7
TIAM1	PAK1	ABHD3	LOC545261
COCH	ZEB2	DBI	CHAC1
PRKAR2B	AFAP1L1	TBC1D10A	SCRN1
OGFRL1	MYT1	BTBD14A	EPHX1
CACNB2	RND2	CHST7	AW125753
MYL4	COL11A2	2900016B01RIK	MYH10
CAMK1G	GATM	VIM	2310068J10RIK
USP27X	ABCA2	GSTK1	CXADR
NPNT	GNG11	TMEM144	BC017612
HIVEP2	CREB3L2	BOC	TMEPAI
WDR37	FKBP15	FMN2	TMEM37
TMTC4	PIGZ	ARHGAP12	CAR14
BTBD11	RGS3	TTYH1	KCND3
PTK2B	TSSC4	PTPLB	ACSL5
C030015D19RIK	ZFP276	2021-09-06	TGFB3
GABRD	CD9	UGT1A6A	CD68
RIMS1	MTF1	AQP9	ZDHHC15
SMARCA1	SPSB1	MRG1	TMEM158
NEFH	HR	AI843639	EIF1A
A330102K23RIK	9830001H06RIK	SLC26A6	SLC10A3
BEX1	B3GALT5	TRIM34	FHL2
NELL2	NINJ1	PCX	PEA15
NRSN2	OLIG1	0610009J22RIK	SH3D19
PTHLH	AI835735	ZFYVE21	CLDN2
GALNT9	2610030H06RIK	NME7	BASP1
AI595406	ARPC1A	SH3PXD2B	ZIC3
9430069J07RIK	RNPEPL1	EIF4EBP1	SPHK1
2900054C01RIK	POU3F1	PRKCD	SH3BGRL3
1700008O03RIK	MTA3	NFIA	DYNLRB2
GPR85	FRMD4B	EPDR1	IAH1
B4GALNT4	PDGFRL	SOCS3	FSTL1
D7ERTD715E	C430004E15RIK	TANK	ZWILCH
ACOT10	LINGO2	UGP2	TRIM34
SNAP91	BC057371	PGCP	COBLL1
SEZ6	DIP2A	CLYBL	ITGA8
A030001O10RIK	TMEM110	LMCD1	D10BWG1379E
AI836758	TNFAIP6	AHCYL1	BC005512
TMEM158	PPP1R3E	EG633285	ADAMTSL4
A930041I02RIK	PDGFA	GADD45G	KLF5
CACNA1G	CTPS	ALDH6A1	SOCS2
SH2D5	DUSP10	ANTXR1	NUDT4
RASGRP1	P140	5730414N17RIK	4930544G21RIK
RIMBP2	SPATA13	NOTCH1	MYO1C
HPRT1	ELA1	GABRB1	AEBP1
SLC35F4	LEPROT	0610013E23RIK	PTPRJ
MAPK8IP2	DICER1	TMEM176A	9030409G11RIK
SPG3A	FBXL5	EMP1	CSF1
NAV3	CDH6	ARL6IP2	PNPO
GABRA3	HIP1R	HSPB6	EFNB2
SLC17A7	FRYL	2410025L10RIK	NID2
USP15	QDPR	SALL3	SAMHD1
DLG2	ELAVL3	PDLIM5	D12ERTD647E
DOC2B	SMURF1	ZFP36L1	CACNB4
CABP1	ENTPD7	ADRA2A	NTN1
SNX16	TBC1D14	RAB13	CAMK2B
KCNA5	4632427E13RIK	PTCHD2	RGS8
HAP1	D630045J12RIK	HRSP12	MEST
3110050N22RIK	COMMD9	LOC635753	IER5L
RNF157	JPH1	FADS1	MN1
GNAZ	ADAM19	C130071C03RIK	GSTO1
AP1S3	NPB	TGIF2	TINAGL
RGS17	9430080K19RIK	HSPA8	SLIT2
LANCL2	ZFP579	PMP22	HPRT1
MMP17	GIPC1	SLC12A4	2900073G15RIK
D16BWG1494E	RNF128	IVD	TPM3
D430019H16RIK	RHOBTB3	ZEB1	TXNRD1
2810409C01RIK	SNAP23	TTC23	TUBB3
ST8SIA3	CHMP1B	FGF1	3632451O06RIK
CACNA2D1	CSMD3	PTCH1	9830115L13RIK
4930488B01RIK	MDM2	AI843755	ZFP236
DRD1A	PPP3CB	SNCAIP	HTATIP2
SAMD12	2010111I01RIK	PHKB	DPYSL3
NR4A2	MINA	AFF1	2610019F03RIK
LRP11	CYFIP2	SLC2A12	LAPTM5
9030425E11RIK	FBP1	MPP6	2610510J17RIK
C230040D10RIK	HSD17B7	SEC14L2	B3GNT2
CNIH2	2810405K02RIK	PRELP	PDLIM5
KIF5C	PDHX	PGM2	TACC3
TESC	SOX6	CUEDC1	AI427515
CAMK2N2	THNSL2	ADAMTS9	LMO7
AW060742	SFRS11	TTC12	SMC2
PLK2	DCPS	RAMP1	LIMA1
ATP6V1B2	SPECC1	2010002N04RIK	PTPRK
CALM2	EDIL3	FZD9	APP
DNAJC6	EFHD1	BTG2	RPL13
SLC30A3	SLC10A7	LRRC33	CPM
AI608492	CNTN2	GBP3	2700055K07RIK
B230208B08RIK	ATG4C	RGL3	TCEAL3
KCNIP2	HIST3H2BA	TMEM100	TES
NPY5R	2410129H14RIK	LIN52	TMEM117
KITL	FRAG1	SERPINA3N	TMEM64
C030025P15RIK	PELI1	CNTFR	COL6A3
AU040829	DOCK6	ELMO2	FKBP7
YWHAG	SPAST	PLCB3	PDGFA
MTAP6	DEGS1	E130203B14RIK	STXBP2
WDR40B	DLL1	GLI2	NIPSNAP1
MGST3	BCHE	GPR37L1	MAD2L1
CYP26B1	LZTS2	GM444	B2M
FNBP1L	REEP3	SNTA1	PRKAB1
AW146242	2310031A18RIK	MIA1	PEBP1
ACOT9	RNF13	RREB1	A530047J11RIK
NPY	SLC22A5	GPR146	DGKG
ENSA	DIP2B	CACHD1	ISYNA1
RAB40B	PHC1	1810010H24RIK	FOXC1
FGF12	2810439F02RIK	SPRED1	HNRPA1
B230112C05RIK	CNTN3	CTBS	NXPH3
C030014L02	DCTN4	OAT	NSG2
IGF1	KIF13B	AU020206	SKIL
IQSEC3	ADI1	ZHX3	RBPMS
AI854703	S100A3	2810055F11RIK	D8ERTD82E
DPYSL3	SLC35A2	SESN3	AKR1B3
PLXNA2	DUSP7	BCAN	PCTK2
NTRK2	RAP1GDS1	EPHB3	PDE3B
COBL	YWHAQ	PHGDH	MCTP1
GUCY1B3	D18ERTD653E	9530058B02RIK	A130040M12RIK
WIPF3	CDYL	HLF	AU067824
STAU2	MTUS1	HS3ST3B1	2900054C01RIK
EPHA4	CHFR	TRIM47	STX3
TRO	GPR155	AGPAT3	EML1
ZFP179	DGAT2	STK38L	1200004M23RIK
DBC1	ADAM9	2900084O13RIK	NCAPH
MAPK8	WDFY1	IL6ST	CD151
CUGBP2	GAB3	POU3F4	ME3
HERC3	WNK1	TMEM164	TLN2
CNR1	ALAD	PECI	CYBA
STXBP5	BPGM	ZFP423	ELAVL1
RPH3A	GPR176	ATHL1	MYCBP
PPM1E	5730446C15RIK	PRRX2	1190007F08RIK
AI852580	ABCB4	SLC12A7	HFE
B4GALNT1	TMEM41B	PSPH	BDNF
NTSR1	RHOU	TMIE	MCM7
ZMAT4	2610110G12RIK	DOCK1	PIPOX
GMPS	LDLR	SDC2	STMN1
TSPYL3	USP16	PARVA	CDC42EP3
AI851453	C630043F03RIK	KCNG4	ASF1B
D930026N18RIK	GNG12	SMOX	9430041P20RIK
FAT4	LATS2	ACAD11	GMNN
LRRTM4	5133401H06RIK	BC046404	SERPINF1
SH3GL2	H2-K1	GPM6B	NPAL3
TRPC4	PTK2	RHBDF1	TM6SF1
2900011O08RIK	DUSP19	DCXR	TUBA3A
TRPV2	CYP2J6	SALL1	HSPA4
9430041P20RIK	TMEM77	RGMA	AV025504
JAKMIP1	4930406D14RIK	SPRY2	OCLN
RAPH1	GMFB	NPAS3	PCDHA4
AI504432	9430029L20RIK	ADCY2	CCND2
RGS8	ITCH	WWC1	CDC42EP1
NUPL1	MAN1A2	AI413194	OLFM1
TMEM35	ELF1	PVRL3	SHH
LRRTM3	MTAP1A	HSPB8	4632417K18RIK
2810039F03RIK	MSR2	CML5	ANXA7
THSD7B	STEAP2	GGTA1	SH3BP5
PTHR2	CACNB4	AS3MT	TRIP6
DNM3	SLC31A2	RHOQ	EFNA5
FOSL2	MYO5A	TMEM176B	AADACL1
AK162044	LOC545539	LRRC51	PCDH21
D12ERTD553E	APOOL	NEK6	SMC4
ACSL4	2610204M08RIK	GJB2	2410014A08RIK
ADAMTS3	2700085E05RIK	F5	MCL1
MADD	SCCPDH	FOXO1	HSPB6
ARHGAP20	PHLDA1	SLC25A34	SPTY2D1
MAP4K5	RAB32	EVC	PTER
CHAC1	MAPK8IP1	CPT1A	SNAI2
CBLN2	KCTD4	MSI2	NGFRAP1
2021-03-01	CDKN1C	PCDH10	CYFIP2
6330407I18RIK	GNB4	INHBB	SEC24D
ZDHHC23	4931406I20RIK	KLF3	EFNA3
DBNDD1	SAMD4B	INTU	VAV2
AW112037	8430427H17RIK	IFRG15	AAAS
STK11	FNTA	LRRC8A	RAB3D
RAB3B	DEB1	BCL6	COL4A1
FBXL16	ALDH3B1	METRN	LOC554327
CYGB	PFTK1	H2-EA	SULF2
4631426J05RIK	2310035C23RIK	LMNA	MAP4K5
ATP2B1	GPR177	IRGM	MAP3K8
TMEM74	P2RY12	DCI	FEN1
RGS2	HEATR5A	HUS1	2210411A11RIK
2300002D11RIK	VAMP3	SLC25A33	HPCAL1
PKIB	IPO13	IL18	TACC2
GRIP1	LY86	GREB1	2610305J24RIK
TMEM181	SPTLC2	GRTP1	G6PD2
SVOP	NCBP2	PLXNB2	ATP10D
PCDHB12	EHHADH	FMO5	2010316F05RIK
NRN1	DPY19L1	SERPINH1	LOC666231
BSN	TMEM112	6330578E17RIK	MBD1
2900046G09RIK	GRIA4	KCNIP3	TRIM46
MTAP9	SLC29A3	1190002H23RIK	GJA5
LOC675405	REEP5	5330406M23RIK	IGFBP2
D330017J20RIK	9930012K11RIK	HHATL	TANC1
ZFP483	RAB21	KIF1B	VASN
CD200	PRDX2	JAM2	IFIT3
YPEL1	HMG20A	AW125753	SERPINB6A
TANC2	GALNT10	NAT1	IQGAP3
RGMB	3110004L20RIK	CCDC122	PRELP
1500041B16RIK	PCOLCE2	RCN2	OTTMUSG00000000720
2900026A02RIK	NIPA1	LDHB	RNF32
MFSD4	CCNJL	PPP2R5A	ZRSR2
FRMD3	SHROOM3	D5ERTD40E	EDG2
KCNJ9	EPB4.1L2	PDGFRB	1700029F09RIK
MCF2L	LARP6	SLC20A1	FOXG1
YKT6	RKHD3	CPNE3	MAN1C1
SOD2	CPEB2	ABAT	NAP1L2
ZIC1	FAH	DDHD1	TMEM98
NIPSNAP1	RCVRN	GABRA2	HS6ST2
CCDC120	BB128963	ADRBK2	FXYD5
GPR64	DYNC1LI2	ARHGEF17	2810474O19RIK
PAQR9	B130050I23RIK	NIPA2	GPX3
OLFM2	ASAH2	EFEMP2	TSGA2
LONRF2	2010316F05RIK	2310047A01RIK	DSEL
GRM2	TBL1XR1	TRIP6	DDX58
RWDD2	ARHGEF2	ENAH	TUFT1
D0H4S114	NOL3	POU3F2	C1S
GCNT2	AI840826	PFKFB3	2900093B09RIK
FBXL2	PDE3B	HIF3A	4933412E12RIK
DAPK1	PHC2	SC4MOL	UNG
BC025575	EIF2C3	SOX2	EFNB1
2021-09-11	LRRIQ2	HRH1	OBFC2A
AI839402	PYCR2	MAGI3	TMEM123
D1BWG1363E	2810488G03RIK	PHYHD1	NMNAT2
TSHZ2	MTAP7D1	SLC35D1	CACNB2
MKX	SLC25A38	A830082K12RIK	NCAPG2
RYR3	APLP1	MYO6	2010107G23RIK
PDXP	GALNT13	BE949265	SLC2A3
2021-09-03	LDB3	SOX21	LIG1
CHN1	TMEM49	HADHB	VAMP5
6330419J24RIK	9130213B05RIK	NNT	2310008H04RIK
CTXN1	ELAVL1	DAG1	LGALS7
CNTN3	2410104I19RIK	LOXL1	SUMF1
PCSK5	MSTO1	ITGAV	CCNC
DMXL2	2600009P04RIK	CPXM1	TCF19
INPP4B	LAD1	CABLES1	NBL1
FBXW7	EXPI	GRHL1	DEPDC1B
THY1	LIPA	ANXA6	RTN1
KIFC2	A230046K03RIK	EML3	CDC14B
SGTB	RNF43	FBLN2	BAMBI
GNG3	A030001D16RIK	DDIT3	LRRC59
EXOC6	EXOC6B	1110021L09RIK	RHOC
PRRG3	AW045895	4933431E20RIK	GADD45A
RAB27B	PSCD1	2810037O22RIK	SERPINB9
KLHL1	STXBP3A	CTSO	PRKAG2
CACNG3	HIST1H3D	MICALL2	GLCE
2410127E16RIK	S100B	SWAP70	PHYHD1
8430436O14RIK	ARL2	TRPM3	SCPEP1
TMEM28	DAZAP1	ALDH2	2010204K13RIK
ARMC8	ANKRD39	1810011O10RIK	ODC1
PODXL2	AW048948	TIPARP	MCAM
RPS20	SRD5A2L	ARRB1	PTTG1
SGPP2	DGKA	A530016O06RIK	NCK2
PTBP2	ATP6V0A2	RNASET2	RPS27L
CHL1	SS18	CHPT1	MTAP6
C030011L09RIK	3110001A13RIK	ZDHHC18	ADSS
ZWINT	SLC9A9	5730469M10RIK	SLC12A2
TMEM169	MVD	MFHAS1	SPBC24
GPRASP1	SDF2L1	CTNND2	PYCR1
JAKMIP2	EHD1	DHRS1	SH3BP4
GTF2H5	PDE4DIP	METTL7A	NEDD9
ST6GAL2	ENPP3	PDCD4	KLHL29
MAPT	ABHD5	COX10	AMOTL2
AW123113	DDX26B	NMB	TMEM176A
VASH2	CCDC134	PTGS1	PHF15
FGF13	LAMP1	LOC553095	H2AFX
CDKL1	CMTM5	RBM20	MORF4L2
RBM24	APBB2	PEX11A	SCOTIN
TUBB5	IL1A	LHFP	IGFBP5
WDR17	VAT1	L2HGDH	ACTN4
COL8A1	CPD	PFKM	G6PDX
SCN8A	SBF1	ARTS1	STARD5
CDH7	FGD3	4833442J19RIK	TPM2
PPP1R13B	NFKBIB	SYCP3	IGFBP7
CNIH3	ENTPD5	SASH1	RBMS1
LOC629059	MAP4K4	CREG1	REPS2
CBFA2T3H	ATP11A	PITPNC1	A330019N05RIK
2021-03-04	CHD7	DULLARD	BC063749
CACNG2	CDC40	CKLF	RNF125
MN1	SMARCA5	PPIC	PARP9
A830073O21RIK	SEMA4C	A530050D06RIK	NINJ1
HCRTR1	L3MBTL2	A930005H10RIK	2300002D11RIK
ACPL2	UBL3	TMEM44	GPR176
ZRSR2	2310007D09RIK	E2F6	MTSS1
PPP3R1	CYLD	CCBL2	CITED2
DLEU7	MTMR2	5730509K17RIK	RIAN
CADPS2	LRRC8D	ETFA	0610012G03RIK
CAMK1D	FGF7	LYPD6	6720460F02RIK
GJA5	SEZ6L	NFATC1	KDELR3
2900093B09RIK	PIM3	NFE2L2	FZD3
PKIA	SSNA1	GM2A	ALDH1A7
SULF1	SC5D	ARHGAP18	SIVA1
SLIT3	TRAK2	DRP2	CAMK1
APBA2BP	SHKBP1	CGRRF1	VSTM2
INHA	PLEKHG1	5730433N10RIK	IQGAP1
C130092O11RIK	CCDC86	CYP1B1	WBP5
RBM9	PTPRO	SGPL1	EGFL9
EG245440	DLL3	LRRK2	S100A4
FLRT2	TRADD	NLN	MYL6
DUSP14	MBNL2	GSTT1	RBL2
CRABP1	SH3GLB1	LTBP1	IBRDC3
PGR	ARSB	ZBTB20	NRTN
EPHA5	SCAMP5	AKP2	USP27X
RAI14	NCOR2	ADD3	STK32A
GARNL4	PSMD6	TSC22D3	ST3GAL6
PTPRN	CLIP3	ZFP217	2900026A02RIK
OSBPL3	H2AFJ	LACE1	D14ERTD500E
EVL	RAMP2	ECHS1	DHRS1
REEP1	HMBOX1	SPSB4	2700094K13RIK
RAB3A	CHST5	CAMK2D	GSTM7
WNT9A	3110027N22RIK	NEBL	D230025D16RIK
LRRTM1	TMTC2	IER2	DOCK5
4932409I22RIK	2810043O03RIK	CRYZ	YTHDF2
GRIA2	RALGDS	TRAF3	TCFCP2L1
TARDBP	MYCL1	WDR20A	4833442J19RIK
CAR4	2310006M14RIK	KCTD5	DUSP4
ARHGAP25	4930453N24RIK	LACTB2	SORD
HN1	C630004H02RIK	GNAO1	AI747699
A930038C07RIK	HINT3	D630033O11RIK	ZDHHC23
NETO2	NPAT	EFHD2	RBM43
CHCHD6	DUSP15	KCNK2	DNAJC10
FANK1	TRFP	FCGRT	4933421E11RIK
KNS2	DST	2600011E07RIK	KIF5C
2310057J16RIK	PKP4	ARID5A	ZFP97
4933417O08RIK	CCL3	H2AFV	DDO
8430408J07RIK	KBTBD3	ISLR	STXBP6
CSRP2	SLC25A1	TXNDC10	HSPA4L
AW742931	EZH2	PTAR1	PFN1
GM440	PCAF	NEK8	RANGAP1
NR4A3	4931406P16RIK	0610040J01RIK	EIF4E3
TUBG2	DYNLL1	CAR2	MYO1E
MAST1	PTP4A1	AMOTL1	GOLT1B
GRM5	ACAT2	PFN4	TMEM159
GSPT2	1500011B03RIK	GSTM5	THOC3
CRHBP	DHX37	NDG2	SLC7A14
ADARB2	MAST3	D5BUC30E	2010002M12RIK
ODZ1	NCOR1	RBL1	COBL
ABLIM1	USP25	BC067047	MTAP
PDZD2	DPH4	5730507N06RIK	AW228836
A830011I04	GCAP14	PMM1	ATOX1
FAIM2	RBBP4	GABBR1	PTGDS
TMEM132A	AI451606	CRLF3	AFAP1L2
CPLX2	PDE7A	CDKN2C	EPHA3
EG331392	HRASLS3	DLG5	YWHAH
3110003A17RIK	EIF5A2	CD1D1	ARMCX2
CAR12	SLC9A3R2	SLC25A20	MELA
SESTD1	TMEM40	CLCC1	TMEM16F
PPP1R14C	GKAP1	PANK2	GSPT2
RAP2IP	SEMA4F	CAV2	RCN1
TCRB-J	WDR79	KLF9	MYEF2
SSTR3	RAPGEF1	NXT2	WTIP
SLC7A4	MGAT3	ODZ3	TCBA1
CNTN6	ULK2	SIRPA	2310007D09RIK
HTR3A	GRLF1	TXNDC9	ANKRD42
SYT13	2210012G02RIK	P4HA2	FTL1
RBMS3	USP6NL	SPAG1	FLOT1
KCNJ3	D230040A04RIK	ARHGEF4	HIPK3
SNCB	1110057K04RIK	CTBP2	4930506L13RIK
EFNA5	MBOAT1	NUDT7	FZD7
BC068157	SCRIB	MID1	TPD52
BAIAP3	5830404H04RIK	AZIN1	USP14
OPN3	EN2	BTG1	BTG3
RASGEF1C	RAPGEF5	BLVRB	CACNA1A
LRRC4C	2210408K08RIK	SMPD2	FOXF2
KIF3B	LOC553091	KALRN	AARD
DLG3	MAP3K11	PLN	TESC
EGR2	SH3D19	FZD4	FKBPL
PNCK	4732418C07RIK	ZBTB41	MGST1
THOC1	MFSD3	COL4A4	B230120H23RIK
MYH10	ADAM12	BMP7	PRKCA
AI467657	SNAG1	HEY1	THBS2
6030405A18RIK	SCFD1	COPZ2	SEZ6
CPNE5	PROX1	NPR2	DSP
PRKCB1	ILF3	DGKB	GABRB3
SH3MD4	GBA	AMMECR1L	PAFAH1B3
CPNE8	1810029B16RIK	PTN	1700009P17RIK
2610201A13RIK	HIPK2	MBOAT5	BC030440
MAP3K5	MAN2B1	LGALS3BP	5530401J07RIK
D630004K10RIK	ENOPH1	LOC626802	ESD
GPR26	TPM1	MID1IP1	ATG10
PRKCH	4832420A03RIK	HSDL2	A830011I04
LYPD1	ATP9A	A430106J12RIK	MTMR7
9330159F19RIK	CTSL	TSPAN12	1110006E14RIK
IQWD1	RNF135	PHYH	CDCA5
S100A10	TMEM87B	AAK1	NETO2
2610018G03RIK	ABCC1	MTHFD1	SPSB1
BC052328	ETV6	NR4A1	SSBP3
DIRAS1	USP20	ZFP219	PTGIS
RGS11	MAP4K5	SFXN1	OTUD1
AI836003	GADD45GIP1	OTX1	2310014H01RIK
CLIC6	ARRDC3	ADFP	BAG3
AKAP2	PIP5K2A	FSTL1	CDKL2
VWC2	VKORC1	DUSP1	C030009J22RIK
TLN1	LBR	LOXL3	PPAP2A
TRIM66	2610035D17RIK	CASKIN1	RFC4
NBEA	THRAP6	UBIAD1	B4GALT1
TRPC5	4833418A01RIK	PANK1	F630110N24RIK
5930434B04RIK	1700071A11RIK	PP11R	0610012D17RIK
CECR6	RAB39B	4931406C07RIK	CREM
SIDT1	STARD3	WNK2	SLC12A7
PLXND1	YTHDF3	VEGFB	ANKRD44
CALM3	INPPL1	CSDC2	AW045895
2900075B16RIK	4933407C03RIK	NSBP1	PCBD1
ESRRG	4930402H24RIK	4921524J06RIK	NUCB2
ARMCX1	CD59A	RAB30	ANKRD50
NAP1L3	NAV1	RRM2	PTRH1
RUFY2	DUSP16	RASA3	REXO2
RGS19	NRD1	ZFP760	KPNA2
TTL	SLC7A6OS	IGH-6	HTR1B
STMN1	PARP1	MOSC2	RHOJ
CEND1	DACT3	CHST1	CTTNBP2NL
DPP6	2310046O06RIK	2810402A17RIK	FANK1
D1ERTD471E	BICD2	SLC25A42	MCM3
BEAN	GRAMD3	IFITM2	IRGM
MYO5A	HMGCS1	FUT9	RPS20
BDNF	A630018P17RIK	TRIM37	2510042P03RIK
NEDD4L	RAB4A	CFLAR	TRIM25
CIAPIN1	TXLNA	BC021523	HIST1H3A
CMAS	9130023D20RIK	FGD4	GPRIN3
SFRP4	1190002N15RIK	HDAC8	PHTF1
MKRN3	RAB8B	SMPDL3B	RRAS
KCND2	PAK7	ALDH5A1	SPTLC2
KIF3A	UNC5C	EMID1	PROS1
KCNMB4	HIST1H2BP	ASB6	TMOD3
CAR11	QK	LYRM4	ATAD2
XKR6	2210417D09RIK	D6WSU116E	UCK2
YWHAH	BC019943	CAPN2	ZDHHC2
LASS4	ITPK1	5730593F17RIK	A330021E22RIK
SCN4B	LZTFL1	TMEM129	A030007L17RIK
RAB6B	LLGL1	D530033C11RIK	2310016C16RIK
9330107J05RIK	SCAMP4	TPMT	PAFAH1B2
ATRNL1	PXN	FARP1	GNPNAT1
5730410E15RIK	FCGR3	ACADM	APOOL
TACC2	ZFP758	TMEM56	BCL2L11
CRSP2	ZDHHC20	2310022B05RIK	4930488E11RIK
E130309F12RIK	PHCA	TCN2	YWHAG
SPRYD3	MCART1	PTTG1IP	9430029L20RIK
NCDN	RNASEH2C	CCBL1	PLXNA2
AKT3	TMEFF1	CTDSPL	ERLIN2
PROKR2	TBC1D15	PRC1	GPX4
ANKRD56	5530401J07RIK	5830417C01RIK	RBL1
BC028801	LOC620695	PARP12	CHCHD6
ST3GAL5	CCDC128	NGEF	CHST8
ALDH1B1	RIOK2	CTTN	1700019E19RIK
HNRPD	DUSP26	RUFY3	LY6E
LMTK2	A230106N23RIK	LRP1	SAP18
LHX9	8430419L09RIK	CCDC18	CDCA4
5033430I15RIK	ACSS2	ELAVL1	2021-09-11
SRRP	SCN8A	ITPKC	CCDC89
CITED2	CREBZF	ITPKB	BC022687
FOXG1	TMEM19	2810003C17RIK	CRLZ1
SLC2A13	TBC1D16	COL23A1	CHEK1
SS18L1	6030400A10RIK	4833426J09RIK	HCFC1R1
GRIA3	2510039O18RIK	MBOAT2	RRM1
HK1	NUDT8	ELOVL5	STEAP2
GOT1	DAAM1	CHD1	FHL1
CGREF1	PPP2R2A	UNC13C	RASSF3
VGCNL1	TLE6	LAMP2	CD8B1
TRIM32	NUDT16	PTPLAD1	ENDOD1
CACNB4	PLEKHF1	DBT	6030405A18RIK
PNOC	GPR34	B230380D07RIK	GALNTL4
TMEM41A	LTV1	SOD3	MTPN
MAF	1810015C04RIK	2410187C16RIK	LITAF
RAB26	CFL2	CIB1	CD248
1110007A13RIK	KLHL17	SUOX	ALDH1B1
MAPK10	ORMDL2	MOBK1B	PHF16
LRRFIP1	TMEM33	AA408650	PIK3CB
PPP2R5C	ARHGAP12	LOC14210	ALG10B
CREG2	PRIMA1	PIR	SLIT3
B4GALT5	PANX1	ADAMTS5	JAK3
6530415H11RIK	SSPN	CCDC3	NXN
PIP5K1C	PAFAH1B1	TTF2	ENPP3
SSX2IP	PTPLA	SLC6A1	IGFBPL1
TACR3	ALDH9A1	GCSH	9230114K14RIK
AP1GBP1	BAZ2B	CD247	LRRC8D
PJA2	MTMR7	CD151	PHLDB1
KLF5	EPHB1	BBOX1	NFE2L2
DTL	RBM39	GALM	NUCKS1
WDR47	B930025B16RIK	CTNNBIP1	THY1
EGFL7	PTPRJ	MEF2D	XRCC5
A830010M20RIK	A930016P21RIK	EPB4.1L5	2210016F16RIK
WDR6	DLG1	4930589M24RIK	TMEM140
2610044O15RIK	GM22	PTER	KLF10
KCNMB2	D19ERTD737E	DOCK7	STAT1
IMPDH1	P2RX4	PLEKHF2	DLX1
PIP5K2B	GAL3ST4	2310043N10RIK	AI467657
ASTN2	RNASEH2B	MRPS14	ATPIF1
CHRM1	LRRTM2	SMAD5	OSTF1
6330500D04RIK	ANKIB1	ACTB	RTN4
KCNAB2	LAMP2	GLB1L	CTSB
2310045A20RIK	BC046331	ZAP70	EMILIN2
ACSL5	AW555355	CAMK2G	COPZ2
C230082I21RIK	NDUFA12L	SKAP2	MAFF
CD34	MPP5	APLN	SLCO5A1
FRY	TMEM167	A230075M04RIK	STEAP1
DFNA5H	GAS5	1110033M05RIK	SLC44A1
DYRK2	HIST2H2AA1	PPM1M	PDGFRL
SGIP1	SLC35A5	D11ERTD759E	ACSL1
ACVR1B	BMP2	LRP10	IKBKG
SLC2A6	GART	EPHX1	AKTIP
9.63003e+17	INTS4	LIX1L	FBXL2
LST1	DHCR24	GM166	PVRL3
LRFN2	SETDB2	ZFP521	C230078M08RIK
CRYM	GNL2	ARL6IP6	RPL14
EEF1A2	NCAM1	HIBADH	AW123113
2700038N03RIK	FXR1H	EG622645	PLOD2
AI427515	5730601F06RIK	HIST2H3C2	SERTAD1
GABARAPL2	BC030477	FXN	FADS3
SERGEF	9530068E07RIK	ESPL1	PBEF1
GRASP	VLDLR	RP2H	SRXN1
STRBP	SCD1	EPAS1	FRMD6
4930506M07RIK	ATP8B1	RARRES2	HDLBP
SLC9A5	MTAP	GGNBP1	CYBRD1
AKAP6	STARD9	HSD3B7	COCH
DCAMKL1	SGK	DNAHC2	PKP4
AI852064	AGPS	DAB1	WDR40B
CUGBP1	6530404N21RIK	LOC545228	VANGL1
IBRDC3	2900034E22RIK	KCTD12B	HCK
SYNJ1	ACSL3	LGR6	TXNL5
5730409E04RIK	GINS4	SOX5	MRPL33
ARF3	6620401M08RIK	NIP7	CDH6
CCDC112	FKBP1A	CTSF	DDX20
NPTX2	ABHD4	CRTC3	CD34
ADCY5	IFRG15	RYK	PIP5K1A
2900064F13RIK	STX6	HMGCS2	SLC16A7
A230057G18RIK	PSMD11	LRTM2	HIST1H4I
TSPAN13	USP39	TIMM8A1	GMFB
DUSP4	EIF2AK3	B4GALT4	CTXN1
MOAP1	POP4	JUNB	4632404H22RIK
RANGAP1	ZFP664	CDH2	TIMELESS
AP2A2	ADAM1A	E130112L23RIK	D4BWG0951E
LOC632329	APP	AIFM2	SCOC
DNAJB5	MRPS7	D1ERTD161E	CCDC112
RUFY3	LRRC61	ATF3	A830073O21RIK
MEF2A	MON2	DDT	ZFP719
MAPK11	WDSUB1	GPR125	CKAP4
SACS	STEAP1	MYH14	ABLIM3
OGN	JARID2	C030009O12RIK	RPL32
NXPH1	D1ERTD622E	DENND4C	FBXW2
CCRN4L	SCAMP2	CACNG8	CTSK
9630041G16RIK	NR2C1	HYAL1	PRKG2
PVRL3	APPBP2	CYFIP1	CLIC4
CPNE7	GPC1	CTSZ	MDM2
ISYNA1	ZFAND3	JUN	PPM1F
LMO4	1810058I24RIK	CS	2010004A03RIK
SNURF	PLEKHA8	EPS8	E030018N11RIK
LYNX1	SIAH2	KIF11	GCLC
EG434128	SNX13	USP2	EZH2
PPP2R2C	RALGPS1	NRXN1	TFDP2
SLC22A3	DAPK2	MXRA8	MBOAT1
ZIK1	RBM4B	AW011738	D3BWG0562E
SORCS3	EDEM1	RDM1	D16H22S680E
SLC39A10	4933425L03RIK	GOLPH2	HS3ST1
GM1568	KNS2	1110001J03RIK	CBX5
HPCAL1	TPST1	MID2	NUP62
ARMCX2	SGCB	C130076O07RIK	6430706D22RIK
FLRT3	CSF1	TMEM55A	1810063B05RIK
CRHR1	ACY3	ASRGL1	BTBD4
FBXO45	SASS6	TBCEL	NENF
RHOBTB1	PDE4B	MSRB2	FBXW17
MARK1	4921517N04RIK	AMPD2	PACSIN2
C1QL3	TMEM30A	BC006662	ABCC1
PNPO	FARP2	SFRP1	DNAJB4
CTNNA2	TRNT1	AGPAT5	LOC245350
A430108G06RIK	1810008A14RIK	TPP1	NAP1L1
ADSS	SEC24A	PTPN21	RBM24
1700020C11RIK	2810001A02RIK	NT5DC2	CAMK2D
RBM43	KIF21A	S100A4	BCL2L1
NOL3	M6PR	TNFAIP2	GNG2
ACTR3B	FMNL2	FDX1	TBRG1
LRRC24	ITFG3	PTPN12	CEBPD
4631403P03RIK	IAH1	HNT	CDK7
SPNB4	PCGF3	CCDC85A	4930452B06RIK
NUCB2	C030011O14RIK	PRDM5	PCDHA1
KHDRBS3	PDCD6IP	TAGLN	IL13RA1
MAP3K12	SPATA2	DYNLRB2	9430029N19RIK
SFXN3	EFNA1	4930562D19RIK	2010109K11RIK
RIC8B	BZW1	FOXRED2	1810015A11RIK
NMNAT2	ONECUT2	MIB1	TNFAIP8L1
2210411A11RIK	2900042B11RIK	PLEKHC1	GALK2
SUB1	GSPT1	KIF1C	ANKRD32
B4GALT6	EDEM2	CBR4	SPARC
LRRC3B	CTR9	1810014F10RIK	GEMIN6
UGCG	SI	NR2F1	FBN1
RHBDL1	TLOC1	EPPB9	DDR1
2010004A03RIK	C130065N10RIK	2810055G20RIK	TIMM22
ATXN1	OMG	PDE8B	4432405B04RIK
9430021M05RIK	CAPZA1	MANSC1	WDR1
AHI1	4930570C03RIK	HIBCH	SCG5
IVNS1ABP	PDE6D	NQO2	EIF3S5
2810436B12RIK	CCNY	IFITM3	DNAJC17
SYNPO	MAP3K7IP2	SAMD14	SUSD4
CACNA1C	PPFIBP2	HSD17B11	IFT52
PCBP3	FPGT	HMGCS1	TXNL2
ESR1	RBM28	6720475J19RIK	PRKAA1
AP1S2	D5WSU178E	EG665123	RNASEH2C
SH3YL1	MARCKS	TMEM38B	D930014E17RIK
LOC675709	9430098F02RIK	CCDC90B	RND1
SNX10	BC057893	2610507B11RIK	GOT2
ATP6V0A1	TM2D3	CEBPB	9130213B05RIK
BEX2	IPPK	TMC7	CGNL1
ANKRD32	MAPK6	LOH11CR2A	TOMM70A
PTGS1	MRPL54	9030625A04RIK	RUVBL1
BC059841	4933429F08RIK	BPHL	SDC2
GUCY1A3	RDX	MXI1	RPL12
3321401G04RIK	ZFP281	GALNT1	IQWD1
EPHB2	MAPK3	CLIC1	PIGK
LPHN2	2010003J03RIK	LSAMP	PFDN1
A330068G13RIK	B130040O20RIK	FREM2	PRPS2
MGAT5B	ELMO1	H2-AB1	2810025M15RIK
TSPYL1	ARFIP1	TRIB2	CEP192
KCNB1	1700021K19RIK	LRP8	ARRDC4
TOMM70A	DOCK4	VHLH	9130005N14RIK
ZFP238	UBE2F	1200015N20RIK	5430417L22RIK
GDAP1L1	BMP2K	RB1	POLE2
TIAM2	BC017643	BAI3	ZFP758
2900056M20RIK	GTF2H1	SAP30	MAN1A2
DLGAP4	RBPSUH	POLR3H	ARMCX1
GRIK1	TXNL5	TXNDC5	EG382639
KIF3C	TM9SF3	CCDC25	PTPN21
PRKAB2	ZFP306	NFIB	OGFRL1
PEG3	S100A13	CYP4F13	MCM4
EIF1A	PLOD2	NTRK3	TIMP3
VAV2	ORAOV1	GABPA	TNS1
FREQ	SCRN1	STXBP4	CSTB
FEZF2	C1GALT1	PIGY	TMPO
USP9X	RASL12	BCKDHA	AGTRAP
4833446K15RIK	PDXK	ABCA8A	BC022623
BID	PSCD2	AKNA	ATP9A
ATF2	DUSP28	PLAGL1	NUDT18
UBE2N	ERBB4	PLCD1	TNPO1
ME3	FBXO8	NXN	EEF1A2
PRPS1	MBIP	ATAD2	CALCA
TTC3	ACLY	SPRED2	RGL1
RTN1	STAM	CAR3	M6PR
1700012H17RIK	MAP3K7	B3GALT1	FOXP1
NIP7	ST3GAL6	CDC42BPG	TRIM21
KIF2A	RHOA	1500009C09RIK	PODXL
ZNRF2	LOC634379	KLHL25	PSMB3
PJA1	MLH1	AI848258	ARPC5
TRP53I11	AI450326	PLEKHO1	1110004E09RIK
CAMSAP1	3110056O03RIK	SNED1	PSMC3IP
ATP6V1C1	YIF1A	SLC33A1	POLK
TCEAL3	PIP5K1A	OTX2	ELOF1
DGKK	ZADH2	TEKT4	PGD
PRKAA2	STARD3NL	QPCTL	UBE2I
PACS1	HMOX2	CD164	EIF1AY
MAPK1	OSBPL1A	AI854517	ADIPOR2
RASL11B	FOXN2	ATF1	CCND3
GPRIN1	SLC38A2	RAB7L1	SCN3B
NCAM1	FZD5	SPIN1	RAPGEF4
BOK	TRIO	GLO1	CEP164
KLHL23	ST7L	1110067D22RIK	ST3GAL5
INPP5F	SNAPAP	ETFDH	MPEG1
6430704M03RIK	SLC35E3	MR1	1810043G02RIK
PLCL2	SYNPO	ADCY8	SH3BGRL2
USP46	RPS27	5830455E04RIK	GARS
SORBS2	ILVBL	AMHR2	C030027H14RIK
GLCCI1	FSCN1	FXR1H	RBBP8
MPP3	ABLIM2	FUCA1	LOC629059
DDEF1	NPC2	ZADH1	MTMR9
LOC232875	PATZ1	GM944	CBARA1
4930543C13RIK	RAB10	S100A1	MAL
SPOCK3	BC088983	ANKRD25	TMEM119
RAB11FIP5	FDPS	BAG3	SYDE1
NAPG	TMEM106B	ADRB1	PLXNB2
CAMK2D	LRRC28	1110012D08RIK	ZBTB7C
RTN2	INTS6	NUDT12	A730054J21RIK
NEGR1	2810405J04RIK	PCDH20	RPA2
BCAS2	1110032A03RIK	SLMO1	DDEF1
PDE4D	NCALD	CYBA	TEC
1500005K14RIK	SRFBP1	GNAI2	6330500D04RIK
L3MBTL3	MAPRE2	SERPINE2	GATA2
SCG5	IARS	NR3C2	GNG3
AW536275	PARL	A730017D01RIK	BC004022
RERG	APBB1	STAT3	5430432M24RIK
B230317C12RIK	2310001H12RIK	GSTO2	ELMOD1
C130065N10RIK	ZFP40	RBED1	FOLH1
AP3B2	CCT4	SLC20A2	POLR2L
CDKN1A	UTX	LAPTM4A	2610524G07RIK
B230217C12RIK	CPSF2	ARX	5830415F09RIK
PITPNM1	BC022593	CDC25B	VAT1
AI844685	TYROBP	TNFRSF1A	SEPX1
FOXJ3	PPM1L	NLRX1	XRN1
MEF2D	MOBKL2A	PER3	CRTAP
TSHZ3	HIST1H1C	PROS1	AP1S1
BC035295	CDK5	MICAL1	SLC41A2
CLIP1	ZSWIM6	LMAN1	MAN2A1
TNNC1	CTSA	ARHGEF19	PDK3
LOC552912	9630055N22RIK	PHXR4	AMOTL1
MAT2A	SCRN3	HNRPA2B1	0610031J06RIK
USP14	TADA1L	PKD2	ISGF3G
ETS2	ATP8A1	ASTN1	CENPT
ACVR2A	HIST2H3C1	DEXI	1110007C09RIK
ZYG11B	SORCS1	ECHDC2	RPS6
PPM1A	COMMD1	POU3F3	ARHGAP20
PITPNM3	SOCS6	CTDSP1	PRKCE
1110032E23RIK	CLN5	FNDC3B	LHFP
DCAMKL3	AI132487	PIGS	3110032G18RIK
PHTF2	ZBTB8OS	2021-09-08	WEE1
GGA2	2810011L19RIK	BC023202	ATXN1
1600014C10RIK	TBC1D5	LAP3	TNFRSF1A
6330406O05RIK	PVR	AI663975	SAMD4B
1500009L16RIK	BC022960	CNTF	EHD1
OSBPL6	SLC16A7	GPT2	ARHGAP1
CHODL	ZFP14	STARD5	SMAD1
D2BWG1335E	1700019E19RIK	TTYH3	PLXDC2
LOC626281	TBC1D23	5430421B17	LRCH1
GPR61	SYMPK	ZFP467	CALM2
RNMT	AI427122	LRBA	ALDH3B1
PHR1	AACS	FDXR	LYSMD3
2610036L11RIK	SYNCRIP	ANKRD6	TRPV2
ST8SIA1	TFDP2	D330050I23RIK	LIX1L
PSD	ATRN	BCKDHB	1200011O22RIK
1110054O05RIK	SYNGR1	MLL3	NUTF2
GARNL3	GFRA1	LTBP3	CRNKL1
ATP6V1D	GRHPR	CCDC102A	RNF19
PTPN3	ORF5	NR3C1	RABL5
XPR1	RAP1GAP	CHST11	NDFIP1
CACNG5	GOLGA7	4732435N03RIK	CNTN3
ANXA7	3110005G23RIK	ALCAM	BAIAP2
RARB	HIST1H3A	ZFP438	ZFP810
NCALD	C330019G07RIK	STOM	WDR77
CNNM1	POLR2A	G0S2	LTV1
KHDRBS2	STXBP2	SMEK1	CXXC5
DOS	ACTL6A	RCBTB2	SRI
SERBP1	ACVR2B	KLF4	DPYD
TMEM87B	PAK4	STT3B	LRRC41
LMO1	B630019K06RIK	PTPN13	GSS
YPEL4	GTF2F2	PNPLA2	0610007L01RIK
2010002M12RIK	BET1	ZMPSTE24	SRP54
FGD5	SLC43A2	GPD1	ISG20L1
OBFC2A	EPRS	ST3GAL2	BC020077
PITPNA	HIAT1	HMGB2	CNOT7
ICA1	5730596K20RIK	AI426953	C1QTNF2
PRRT1	UCKL1	RIN2	RAN
DBN1	TMED10	EVI5	CAPNS1
CELSR2	TRIP12	CCND3	STT3A
PAPPA2	PLOD3	TMTC3	RPL10
CHORDC1	CCNK	SEMA6D	MED31
SEZ6L2	E430014L09RIK	ARHGEF12	SYT9
IFI205	ZC3H7A	ACP2	C1QDC2
DHX57	2700079J08RIK	DNAJC19	MIS12
SUSD2	RHOF	CDK5RAP2	STOM
HIVEP3	PLCH2	SPBC25	CUL4B
1110031B06RIK	ELOVL4	3300001A09RIK	MLLT3
DLX6OS1	CLK4	9030617O03RIK	AW060742
TBPL1	D10BWG1364E	RBBP9	LOXL3
MECP2	ACAA1A	GPR30	PPP2R5C
PPARGC1B	CORO7	6720462K09RIK	REEP1
TCF20	UBE2J2	RHCG	LACTB2
PTPRR	6720401G13RIK	3110082I17RIK	PARVA
A230083H22RIK	RCBTB1	TEX9	MDFIC
TTC19	9230104K21RIK	SLC39A14	LEPROT
PLXNC1	EHD3	ST5	PRPS1
ST8SIA6	ZFP740	LEPREL2	RUFY3
UBE2D3	TAF11	BTD	1110014J01RIK
TBC1D9	D7ERTD443E	BC043476	SULT4A1
2610002M06RIK	TMEM157	PHYHIPL	ELA1
SLC7A3	LOC634748	9130227C08RIK	MYLC2B
SSBP3	MYCBP	ASPM	2610029G23RIK
DCUN1D5	CRTAC1	PTS	PDZD2
TNIK	TESK2	PTPRT	BAG2
RPS6KA2	UBOX5	SALL2	TBCA
NECAP1	1810059G22RIK	GRINA	ATP13A3
KLHL29	HERPUD2	5730410E15RIK	ERC2
C130081A10RIK	DNAJC19	LNPEP	RPS19
2410024A21RIK	MIF4GD	ZFP606	TMEM167
A730017C20RIK	ANKRD49	UBXD4	ZFP281
2810417J12RIK	4930461P20RIK	D630004N19RIK	CRSP2
PAIP1	VPS54	6720407P12RIK	SCYL2
PLVAP	CCDC100	TAGLN3	VRK1
CHRNB2	B3GAT1	NT5DC3	CTF1
ZBTB10	ASXL3	PIPOX	CAPZA1
AI852444	BICC1	1300001I01RIK	SLC35B4
CARD10	KIF5B	PTPN2	MSH6
HOMER1	ABCB10	DOCK11	POLR3K
MAP2K4	DTX1	BTBD7	FXR1H
SP4	D3UCLA1	CETN4	NME5
PRUNE	CD47	ZSWIM6	B4GALNT1
RGS10	CD53	KCTD1	CETN2
BAG4	ARHGEF7	NUDT6	SLC38A2
NKRF	A230106M15RIK	TCF3	HSP110
9330180L21RIK	9230114K14RIK	CNTNAP2	WNK1
PLD3	MOSPD2	B230337E12RIK	PKIG
XKR4	2810406K13RIK	TJP2	4930579G24RIK
PCMT1	ZBTB7B	AK3	LMAN1
ARMCX4	TTLL5	PTPRF	PAF1
CXXC4	ZCRB1	MSX1	CFL2
ZFP291	9430067K14RIK	ZFP496	PRMT6
RNF11	ST8SIA3	DCTD	AK5
CALM1	9630025H16RIK	CMYA5	SASS6
E230008J23RIK	6330549H03RIK	AI851161	MAFK
AGTPBP1	P2RY13	KLF12	NOLA2
MOXD1	COMMD3	SLC3A2	WDR54
NDRG3	FKBP9	LOC667668	LDLRAP1
PLCB4	4732416N19RIK	TTC32	IRF1
TBC1D24	PAFAH1B2	GPR19	IGFBP6
THBS2	NRAS	ALDH16A1	WDR6
KCNH2	ZFP516	SLC25A5	GINS1
2310058N22RIK	KTN1	AMPD3	CTR9
GNB5	SPHK2	PHCA	NUP205
B130065L01	SH3PX3	A930001A20RIK	KPNA4
GPR123	B930008K04RIK	PPP1R1A	RBMS2
NDN	SEL1L	ACADVL	EHBP1L1
RIN1	RPIA	SCRG1	ZBTB10
MTAP7D2	TCTA	NAT2	CD2AP
CABLES2	MED31	1500003O22RIK	DFNA5H
NANP	9130208E07RIK	SAMD9L	PTHR2
DOCK3	RPGRIP1	SERPINB1A	DYNC1LI2
BRD8	JMJD3	RSPO3	SAE1
1110008P14RIK	YWHAE	NR1D2	ATP11A
HTR7	SRI	FAT1	TCEAL1
FLNB	NSD1	UGDH	AP2B1
PHF16	1810020D17RIK	MTFR1	3300001M20RIK
NCOA7	TMEPAI	MFNG	TAF9
RTN4RL2	UBE2J1	FRRS1	TNFAIP1
BZRAP1	3230401D17RIK	CCDC34	RAD51AP1
GLCE	RAB14	TRP53INP2	1700041C02RIK
LRRC3	PACSIN2	4833413G10RIK	MBC2
OSBPL5	TMEM181	ECHDC1	RASSF5
PNMA1	IMP3	P2RX7	HSP90AA1
MBD5	NIPSNAP3A	TLR6	IFT80
HAS3	CEECAM1	DPP7	BCAR1
NOVA2	3110007F17RIK	WNT7B	D13WSU177E
KLHL8	KPNB1	RAB34	MNAT1
GNAQ	MARCKSL1	D10627	ENY2
C630035N08RIK	CHI3L4	PRNP	CAB39L
GAB2	CADM4	FADS6	BC048355
CCNC	S100A16	NUDT9	SCARB1
RIMS3	USP18	ARNTL	RGS19
SP8	RAD51L3	FMO2	FBLIM1
1500001A10RIK	CDV3	SEPP1	B230333C21RIK
FRAT2	MALAT1	PLSCR1	SERPINB6B
R3HDM1	RPS6KB1	2310014F06RIK	MITD1
HAPLN4	SPATA6	NARG3	EHD3
TXNDC13	LPGAT1	FBXO44	GCH1
PCDHB20	IQCE	MFN1	DHX32
WNT4	2810002D19RIK	PNRC2	PKIA
DMN	2310039H08RIK	STAT5B	RPS6KA3
AR	PSME4	KRCC1	COL4A5
PCDH19	SGCE	CCDC51	TSGA14
ZFP451	2700038C09RIK	SPARC	6330416L07RIK
CRIM1	LRRC1	DMRT3	VPS36
UBE2W	PIK3C2A	DSN1	SCAMP4
CDH22	2610042O14RIK	HGF	DLX2
PPFIA4	ATG4A	4921537D05RIK	H6PD
ELP3	SDF4	EEF2K	B230217C12RIK
1810012P15RIK	2021-09-02	XPR1	CSNK1A1
IRAK1BP1	BRDT	LASP1	NSD1
AFF3	TAF9B	ESCO1	SYNGR2
STXBP5L	PPAPDC1	DZIP1L	ANXA5
EPHB6	GPR137B	RABL4	CAP1
CLDN2	CDC42SE2	CRTAP	RBPSUH
2310066E14RIK	RNF7	TRAK1	MLLT4
C630002B14RIK	INTS7	ERBB2	CCDC80
AMPH	CUTL2	5730410I19RIK	NAT2
REEP2	ORMDL1	MAFF	RUTBC2
2200002K05RIK	DNAJA2	MACF1	ANKRD25
MSRA	D230012E17RIK	KCNJ10	NPM1
D7WSU128E	REXO2	LYN	NFASC
BC002199	CEP27	TNS1	MAGED1
KBTBD7	NG23	NFKBIA	SPAG6
MAGEE1	MRPL53	C79267	ATP7B
APPL1	GGPS1	SH3BGRL	H2-DMA
2900056L01RIK	RBL2	TMEM136	LILRB3
TRIM3	RER1	GABRA4	NUDT21
CTTNBP2	ROCK1	PEA15	PXK
SPIN1	UFD1L	4933403F05RIK	EIF2S3X
ZFP180	MRPL48	TRP53INP1	FTH1
THUMPD1	GYG	VASN	C230081A13RIK
1700037H04RIK	AA591059	TTC8	CYB5D1
BRSK2	PHACTR3	HIST2H2BE	2610002J02RIK
SEMA3E	2210010L05RIK	NADK	CAPN5
RASSF3	CLMN	CLTC	TBCD
ARL15	ILK	PBX1	UBE2E2
PPP3CA	FNIP1	MAPBPIP	1600014C10RIK
E030003F13RIK	9330182L06RIK	COTL1	IPO4
ABCC8	DNM3	5730406M06RIK	1110031B06RIK
PQLC1	1810022K09RIK	DPP8	3110040N11RIK
CCDC9	METTL8	CPT2	ENSA
ANKRD12	AGC1	4632428N05RIK	SLC8A1
TNRC15	STX17	ATE1	CCDC71
USP11	5330431K02RIK	FABP5	2210013O21RIK
PTEN	FCMD	SKIV2L2	MAEA
JPH3	NLK	IRF2BP2	UFM1
GRM8	MRPL14	SLC24A6	CYGB
SHOC2	SLC27A4	NGLY1	CYLD
MAPKBP1	ARIH1	CSPP1	ASAH2
X83328	UBQLN1	6430547I21RIK	BRCA2
BTBD10	LSM3	CNNM3	LOC433261
FHL2	9430020K01RIK	AA407659	ADAMTS1
CCDC106	ETV1	ITIH3	PLEKHF1
TMEM142B	1110007A13RIK	BC023882	CSNK1G1
DLAT	DIAP3	MCCC1	MYO5A
0610010F05RIK	TGOLN1	SYT12	ORAOV1
EPHA8	ORC2L	RECC1	WDR35
HSPA12A	EIF4A1	F2R	DLL1
FBXL10	DDX54	MCMDC1	ABLIM1
B230216N24RIK	TRPM7	PCCA	GBE1
4930414L22RIK	CRLF3	WIPI1	HUNK
1700020I14RIK	MTMR4	HSD17B10	IRAK1BP1
LOC244958	ZFYVE26	A630072M18RIK	COMMD3
TFPI	USP36	PHF21A	AI553587
KCNK12	SDCCAG1	1500004A08RIK	DSCR1L1
NEURL	CENTB2	FGFR2	WDHD1
MTMR7	FXC1	MAP3K1	USP39
SMARCA2	TRUB2	LYRM5	RCN3
BC018242	JMY	LGALS1	DAB2
NANOS1	MKRN1	6030446N20RIK	5330431N19RIK
TRP53BP1	TCF12	MUT	KPNB1
PGRMC1	2610019P18RIK	SLC43A3	GPR177
CSNK1G1	KIF5A	PTPN9	AW146242
2810454L23RIK	NEK3	1110028C15RIK	ADFP
CACNB1	CAP1	CCNB1	SPATA5
COL6A1	YY1	RAB5A	6820424L24RIK
RND1	CSTB	9530025L08RIK	THNSL1
RXRG	PAWR	RAB9	TOE1
HSP110	ASB1	IGSF11	SUPT5H
OTUD7A	DLGAP2	LOC669787	GALNT13
EFCBP2	NUDT16L1	2900062L11RIK	ARF2
NUCKS1	AP3M1	SRC	LARS
4932442K08RIK	TMEM134	GGH	TNNI1
TSPYL4	WASF2	SP5	GGPS1
4930539E08RIK	EIF3S5	DNAJC3	RPL35
CARTPT	ROD1	BLOC1S1	ADAM9
EPB4.1L1	COG4	4930422I07RIK	1810037C20RIK
SRGAP2	KIF13A	PFKFB4	SLC6A8
ERGIC2	HDAC5	MCCC2	ZFP593
TRAFD1	COBLL1	STK38	BC056474
RAC3	CCNDBP1	E2F5	1700088E04RIK
SMPD3	ARL2BP	IQGAP3	IL1RAP
GABARAPL1	FEZ1	MAGI1	D930015E06RIK
CDH13	PROM1	MYL9	PGPEP1
2900024O10RIK	AW061290	MYD116	USP25
ATP2A2	EGFLAM	A430107N12RIK	9530068E07RIK
AU044698	PUS7L	LAIR1	PRAF2
RPS6KL1	NCOA3	IFRD1	DOCK7
5430405G05RIK	ADAMTSL4	MYH11	CYB5B
WAC	2810003C17RIK	EVC2	PDCD6IP
PRPS2	LMAN1	RNF149	CPT1C
ZBTB11	RAD1	TBL1X	DENND2A
ZFP9	PCP2	MRO	TASP1
ANKRD50	D630023B12RIK	SLC22A4	ACOT7
DCK	1810006K21RIK	LYPLA1	RPL41
RHEBL1	GOLGA4	IL13RA1	INTS5
HERC1	CALU	ASAH1	ASCC3
LCK	RAB6IP1	STK40	PCMT1
LSM8	DUSP11	NAT6	CHMP1B
BBS4	VANGL1	TRP63	ATP7A
PLXNA1	FGFR1OP2	D430028G21RIK	GLRX
INPP4A	BACH2	EDNRA	2610001J05RIK
C330021A05RIK	ERH	3732412D22RIK	PPCS
D10ERTD438E	PTPN11	SIL1	CLOCK
FADS3	GCLC	2810021G02RIK	FZD6
IQSEC2	PSKH1	H2AFJ	FURIN
TES	E030049G20RIK	BC013529	2010012C16RIK
ZFP161	DNAJA4	C2	LAMA1
BEX4	SLC35A3	POU2F1	PLSCR1
UBE3A	DNAJC16	ITGB1BP1	TERA
6430517E21RIK	HIATL1	2010106G01RIK	PAPOLA
RPL15	CATSPER2	TMEM142A	TRIM67
SOCS7	MPPE1	FOXO3A	ZFX
RIMS4	4930430E16RIK	NUMA1	EDN3
HOOK2	ARVCF	PAIP1	GSPT1
SPOCK2	TBC1D9B	LYSMD2	RBM9
DENND2A	VPS36	SUMF2	TMEM43
PREPL	GNG4	FUCA2	KRTAP21-1
RAB3IP	PCDHB10	MOBKL1A	MAP4K4
PDLIM7	HEXB	TNPO1	RNF6
IDH3A	PAPSS1	FUK	SUOX
PABPC1	RNF141	ABCA5	GOLPH2
RAB14	CYB5B	3830612M24	RAPGEF6
ANKRD13D	HDAC1	CUTC	FKBP14
SLC29A4	CDCA8	ZFP592	PRRG3
TTLL1	PRKG2	HDHD2	ARBP
RPS15A	C130030K03RIK	CDH10	PPP3R1
ABCG4	DERA	LAMA2	ZMYM1
CYS1	TIAL1	SEMA4A	LOC632329
SEC61A2	C1GALT1C1	ANXA5	CTBP2
NOS1	H3F3A	DCHS1	GPR12
GNA-RS1	TBC1D10B	DENND2A	ZFP87
4921524J17RIK	KIF1A	MTX3	DYNC2LI1
GNL3L	EIF2S3X	AI118064	1110034A24RIK
SLC26A4	1810011O16RIK	TRP53I13	BRAF
H2AFY2	2610020O08RIK	ABHD4	BNIP2
1700001L19RIK	ICMT	PARP9	GLA
AADACL1	MPEG1	TOP1	F730047E07RIK
YWHAZ	PCM1	PURA	OSBPL6
KLF16	PHYHIPL	AHR	RNASEH2A
2310005C01RIK	KLHL20	SLC30A7	SPG20
TTC7B	TCP11L2	ABHD6	FNDC3B
MKRN1	SV2A	CHCHD2	ZIK1
ATP8A2	RAG1AP1	RWDD4A	IFT74
2410016O06RIK	1110008H02RIK	TMEM161B	RPS3
ATPIF1	COPS2	P4HA1	ZBTB1
USP33	PPP2R5C	A230106D06RIK	COMMD1
GRAMD1B	LSM7	VAMP8	PAFAH2
TH	UVRAG	2021-09-11	RPL39
TRIM23	GRB2	PIK3CA	NANS
APRIN	KCNQ1	ACYP2	AU022875
SPPL3	4921506J03RIK	CLMN	AI481105
SLC7A1	UXT	PER2	MRPL38
GAD2	POT1A	SPRY4	2610206B13RIK
DUSP8	MEIS1	JMJD1A	EXOC4
CACNB3	TBCCD1	MFSD1	2610027L16RIK
CAND1	SNX5	ELN	SYNGR3
SETD5	SLC8A3	DHRS7	CREB3
MTMR4	OSTF1	5730536A07RIK	TRMT5
2010309E21RIK	RBM41	GOLPH4	ADAMTS4
C030009J22RIK	COBL	0610010D24RIK	1110004B13RIK
LYPLA3	THEX1	LOC673662	BB125219
UBE3C	FBXO11	MED25	GMPS
C030046I01RIK	1110036O03RIK	TRIM21	ATF5
FBXO31	4632419I22RIK	CNNM2	LSM3
TUSC3	GPX1	SYNPO2	CSTF3
LHFPL4	MGLL	PPAPDC1A	TAPBP
PCDH8	CLCN5	5730449L18RIK	BC064078
TMEM90A	6720463M24RIK	GEMIN8	TRADD
PLCH1	SIVA1	1110018J18RIK	LTBP3
ATP6V1A	PRKCN	HIST2H2AA2	AHCY
FILIP1	MAP2K5	ACAT3	DUSP5
PRICKLE2	GCA	A630033E08RIK	IL10RB
D630023F18RIK	RC3H1	RHOBTB2	ACTR3
WFS1	4933421E11RIK	SORL1	RARB
2900009J06RIK	ZFP110	CAPN3	NUP155
ATG9B	0610030E20RIK	BC004044	1110013L07RIK
CMPK	DNASE2A	MALAT1	MRPL53
SMOC2	LOC620893	IDE	SKP1A
GNG13	GMPR2	GNG5	HEXB
MTMR9	NUTF2	PTDSS2	TRIM27
GMCL1	PPARD	TM7SF2	AKAP13
SMYD5	COPA	SREBF2	2410129H14RIK
2900086B20RIK	PABPC1	1700034H14RIK	FYCO1
ADAR	EDEM3	9030418K01RIK	MFSD9
NICN1	ADAM23	SEC63	AB182283
2010204K13RIK	HLTF	FDFT1	EFHA1
SCOC	NHLRC2	4921511K06RIK	RASA1
HDGFRP3	CCNT2	HMGB1	TLN1
PCDHB16	2610529C04RIK	FBXO3	H2-T10
MGAT4B	ZFP81	SUCLG1	4930453N24RIK
EIF1AY	ZFYVE27	MORN2	NUDCD1
UBE2O	SOS2	E130014J05RIK	AP2A2
TMEM24	PRPF40A	MUM1L1	PVT1
2610206B13RIK	STAM2	HMGCL	LOC545600
SPNA2	1110033F14RIK	POLG	9430070O13RIK
C1QDC2	PHACTR1	HTF9C	TCF20
ZFP318	6330581L23RIK	BCR	4732496O08RIK
PRKACB	PLOD1	NT5DC1	NDN
BACE1	SEMA3E	NDE1	DPYSL5
BYSL	SLCO3A1	RNF139	NUP93
MAP3K7IP3	TBK1	EDG3	CDCA7L
CUL2	C920006C10RIK	HDDC3	RPL13A
ZCCHC18	RNF32	SLC37A2	HNRPAB
TRPA1	IREB2	ABHD14B	RPGR
GPIAP1	CDK2AP1	0610007N19RIK	MRGPRE
AI413331	SYBL1	TMED5	APBB2
SYT9	9330134C04RIK	KIFC3	4930427A07RIK
6330509M05RIK	WDR70	PACSIN3	2810441K11RIK
FXYD5	NPC1	3110031B13RIK	HEATR2
MPPE1	PHXR1	PLEKHG2	LGALS3BP
RAD23B	IGSF8	TACC3	FLRT2
4930452B06RIK	MORF4L2	WSB1	COL4A4
CDADC1	ALG14	NAT8L	LYN
A630071D13RIK	1200015N20RIK	2210015D19RIK	ADAM19
A830082N09RIK	0610010E21RIK	ZFP106	CAPZB
SPIN2	NCAPG2	ZFP28	4833408D11RIK
BC030308	EIF5	ORF34	TRIP12
2900009J20RIK	TIRAP	UGT1A9	GGA2
BRAF	FBXO36	LOC673503	DNAJC9
AP2B1	UBE2D1	DPH5	SFXN3
NFYB	DEPDC6	SESN1	EFHC1
APBA1	NFKBIE	TOX	SEC61B
4933400F03RIK	ZFP503	SLC30A6	NAGK
PMAIP1	ZFP191	RGS7	VPS26B
GTPBP9	GPLD1	HIVEP3	ELOVL1
PCBP2	EPB4.1L1	MCEE	RHOBTB1
NEXN	D15ERTD621E	SQRDL	PDPN
D16H22S680E	ARL5A	ARSA	DDX41
CBX6	DPYSL2	FCHO2	NDNL2
IRGQ	GPATCH8	ALDH1A7	UBE2N
CPEB3	TRIM24	ABCC4	1110001A07RIK
1810043G02RIK	HMBS	MKLN1	ABCB6
TRPC1	EIF2S2	DSCR3	GFOD2
GPRK6	ENDOGL1	IMPACT	TMOD1
EGR4	PCNX	BMP2K	1500003O03RIK
TMEM64	RPS6	CKAP5	D10ERTD438E
NUDCD3	GAS2	KCNU1	IPO9
WDR22	BMI1	RABGEF1	SLMAP
RAPGEF2	BLM	ZFP36	C1QTNF5
IRS4	DCUN1D1	MED12	D11ERTD497E
EML5	ZFAND5	EGR1	THOC6
9130227C08RIK	HIRIP3	ARHGAP21	ORMDL3
RTF1	NAT9	IDH3G	NMT1
NUB1	AEBP2	LIMS1	RFESD
EID1	TOMM20	ZHX1	VKORC1
HABP4	LHFPL2	MAP2K6	PREP
C1QTNF2	PPT1	CPE	GATAD2A
D2ERTD435E	1810037I17RIK	ASB8	TM9SF3
BC039210	ZFP62	CML3	BMP4
GFOD2	2310079F09RIK	EXTL3	LZTFL1
PCDHB7	ELK4	FBLN1	COPS2
KL	USP48	VANGL2	1500019G21RIK
PIM2	PCDH15	6430573F11RIK	ADCY1
AP3M2	TCIRG1	SPON1	ACY3
WDR54	TDRD7	KCND1	FMO2
ARAF	SLC35A4	CYP4F16	E430028B21RIK
WSB2	CGRRF1	AW146154	RAB26
SLC25A14	NGDN	RHPN1	SRA1
TNRC6C	4833424O15RIK	PPP3R2	SDCBP
SLC4A3	CCDC21	CMTM6	DCUN1D3
B230333C21RIK	TBC1D8B	EGLN3	SGPL1
SHANK3	RAN	1810007P19RIK	DUSP3
UBE2J1	CDK4	2010208K18RIK	LIPA
PGAM5	NOL7	NUSAP1	CDS1
FAP	AKTIP	5133400G04RIK	SLC39A13
FLOT2	PA2G4	HEYL	SNX7
5530400B01RIK	DPYD	CUGBP2	PDGFB
D8ERTD457E	RBM3	PSAT1	UEVLD
PDGFB	CYB5D2	GRAMD1C	GLIS3
CGN	ARL5B	BC005512	PIH1D1
TNKS2	SAMD8	2010320M18RIK	RPL17
APAF1	AUH	BFAR	FLII
SFRS14	ZFP287	A730030A06	OSBPL9
KIFAP3	2600011C06RIK	ST6GALNAC4	TMEM2
COIL	BMP1	TOB2	1100001I22RIK
PANX2	NKD1	4933439C10RIK	CDH2
2610024E20RIK	GSH1	MRS2L	PPP2R5E
MYH7	CHUK	TTC28	ZFP365
1500019G21RIK	PDK1	DNAJB9	EIF2S1
AA408865	D930010J01RIK	PSAP	DNMBP
ERC1	IGBP1	CHIC1	ANAPC11
LYSMD4	ADD1	OSBPL9	NUPL1
CACNA1H	ACY1	C630028N24RIK	2310047O13RIK
SPATA2L	DMRTC1A	2021-03-02	NCL
PCNX	D8ERTD587E	CTNNA1	CTNNB1
TBCA	RPS27L	SDCBP	DDIT4L
SLC1A6	FTL1	ANK2	CTSD
NPTN	TBRG4	RNH1	C230040D10RIK
KCTD8	MVK	CRAT	GMDS
ARPP19	TMEM119	ANKRD57	2410004L22RIK
USP7	LOC497255	MGAT5	TMEM41A
9630033F20RIK	UBE2G1	CPEB4	1500011H22RIK
CSNK1E	BBX	2900011L18RIK	AA536743
KLHDC2	AOF1	MCM3	ARHGEF2
UBE2V2	ARL8B	LOC215866	ASNSD1
MSC	RAB2B	CCND1	SNRPE
PPP1R1B	3110043A19RIK	HACL1	ARHGDIG
RPL23A	TNKS	MCM4	ETF1
2310014D11RIK	POMGNT1	SFXN2	TSSC4
B830017H08RIK	BICD1	TDRD3	NAB2
IBRDC1	ITGB1	IFNGR1	PDIA5
ATP10D	1700041C02RIK	NRP2	CCT4
2410018M08RIK	CYP20A1	GBP2	PREPL
4933439C20RIK	MRPL24	NR1D1	PLVAP
TSPAN5	RALY	HRBL	FTL2
PSMC6	SPATA5L1	ZFAND3	TTC13
6430548M08RIK	ARHGAP17	ZFP385	PPP2R2A
LOC433886	VPS8	SOD1	YPEL5
CCNI	H47	ABCB1B	PLCH1
SLC7A2	2610029I01RIK	TMED10	SLC16A1
ZCCHC10	PAK2	CIDEA	EGFL7
LSM11	CEBPZ	KDELC2	ARPC4
INPP1	TWF1	ETV4	DDX1
LOC545600	LRRC42	CASP6	RFK
UAP1	4930573I19RIK	CCL21A	PGS1
CHCHD4	CALD1	SLC12A9	2210408K08RIK
EIF4E2	PIGQ	ST3GAL4	TTF2
SF3A1	PEX1	NUP37	1810006K21RIK
WASF1	PPT2	COQ9	LARP7
C78859	MXD1	4921526F01RIK	PLAA
GOLT1B	RBM16	RIAN	PRKCBP1
ECEL1	ARAF	HDDC2	AW548124
EPC2	GP2	RGS1	EIF5A2
RBBP6	C230096C10RIK	CAT	PMP22
AI465495	YIPF6	MYRIP	2900057K09RIK
9530018I07RIK	RPSA	ATP6V0E	SMS
D2BWG1423E	BC033915	ALS2CL	UBE2W
1700041C02RIK	DNAJB12	CCDC6	2021-03-04
TPM3	ZZEF1	BACE1	USP43
ARRB2	FRG1	D030029J20RIK	2310016E02RIK
PCDHB3	RAC1	CXCL1	BAG5
NFATC2	IDI1	SOCS4	2610528E23RIK
UBE2B	TMEM9B	GPD2	ASXL1
MYLC2B	APH1A	1300007C21RIK	SAP30
MAPRE2	5830407P18RIK	WDR78	GFER
CAMTA2	PLEKHJ1	PRKRIR	KARS
BBS5	CSAD	SC5D	GPATC4
FSD1	STOX2	LIMD1	NFS1
2210016L21RIK	FTH1	AI848599	CD3EAP
LRCH1	SLC35D1	PSMF1	BC031781
RAB3D	A630042L21RIK	9030420J04RIK	CUL2
5330438D12RIK	PXMP3	0610038F07RIK	COMMD5
FADD	TCF25	C230096C10RIK	STARD10
BC018507	AMOTL2	MGLL	CDC34
RANBP6	BAZ1A	ACSL3	COTL1
WHSC1L1	1810034K20RIK	2610203C20RIK	AP1G1
LZTFL1	RYBP	CLIP4	TPP2
CHD3	TSC22D4	SLC39A11	CACNB3
ENTPD4	CSNK2A1	POMT2	1700037H04RIK
XRN1	DIABLO	REPIN1	TUBA1B
DNM1L	ANAPC1	SLC44A2	MAPK11
KCNQ3	RABGAP1L	9130023H24RIK	DNAJC14
RTN4R	DMRTB1	NRXN2	DIDO1
1700065O13RIK	ZRSR1	NCAM1	RASSF8
SNRPD3	RERE	COX11	PMPCA
PLS3	BOLA2	SAP30L	BC029722
TRAPPC6B	BC032203	PINK1	SYBL1
5730557B15RIK	CNOT6	B4GALT1	MPDZ
PPP1R12B	EG619719	MUTED	PPP2R1B
2310047C04RIK	POLE3	FOS	SEH1L
EBF3	PIGF	UNC84B	MRPL13
PRMT2	JUNDM2	6820401H01RIK	4632419I22RIK
ARID4A	RPE	HADH	UTRN
BC032203	PICALM	MANBA	1700021K19RIK
PCDHB17	EFHA1	NMNAT1	INTU
FCHO1	THSD7A	9630031F12RIK	UBE2D3
KCNT1	LOC545792	ELK3	PLEKHG3
4833408C14RIK	PGD	NCOA1	SBNO2
3110003A22RIK	FBXO45	CD63	TMEM106C
ZFP667	BNIP3L	AMFR	CARD10
MAGI1	PRRC1	ABHD10	TTLL12
DNAJC5	SIRT7	SGCB	HAT1
PREI3	STAT1	4930471M23RIK	TAF10
COL6A3	PPM1D	FAM18B	MTA3
AU023006	C030007I09RIK	VGLL4	RFC5
PPM1H	UBE2I	TEAD2	CISH
RFXAP	HCCS	5730427N09RIK	CALM3
MMP24	PRKCBP1	HEXIM1	GTPBP9
2310057M21RIK	DEPDC5	2410005O16RIK	PCTK3
GSK3B	NUDCD2	CACNB1	ORMDL2
ZFP422-RS1	TMBIM4	PEX13	COPS6
SEH1L	9130011J15RIK	SON	NCBP2
G3BP2	SLU7	1600002O04RIK	4933411K20RIK
D8ERTD354E	STK10	POLE4	ANK3
CISH	UBE2E2	RABEP1	SKP2
GTDC1	1700066M21RIK	LRRC2	RPL38
ATP10A	AI848100	TSC22D4	SHMT1
AU042671	YME1L1	RRAGD	ACTL6A
CYB5R1	FAIM	FIP1L1	CCDC55
2900057K09RIK	SPTLC1	B230312A22RIK	VAMP3
0910001A06RIK	METTL4	2310008H04RIK	2810004N23RIK
BBS1	GPHN	DDIT4	RANBP5
EG328644	ZBTB24	EPC1	NUP107
RHOT1	SEC23B	3100002L24RIK	YWHAZ
SLC25A12	TNKS2	SYNE1	ITPA
PRRT3	EPC1	LTBR	CPD
HTR5A	FBXW17	CHIC2	PLCD3
OXTR	BC003965	A630054L15RIK	MPP6
TCEB1	STARD13	PDHA1	NEDD4
FBXO11	CDON	ZFP449	PFDN4
GPI1	SCHIP1	B930098A02RIK	MTAP1A
CASD1	9530020G05RIK	C230081A13RIK	TMEM150
TIMP2	SBDS	C330018D20RIK	CDC37
NRIP1	RAD23B	4631427C17RIK	A230046K03RIK
DNALC1	RIPK5	PRPS1	CDK4
6720458F09RIK	REFBP2	SMARCD2	TRPM6
SDCCAG1	ARRDC2	PTPRG	CTSZ
GM1060	TGFBR1	MAP3K12	CHURC1
TPTE2	CPSF6	2310038H17RIK	UBE2J1
PFTK1	RAB4B	STAT5A	LNX2
ZMYM2	YEATS2	SCRN2	RPE
GM347	ZNRF1	AGTRAP	9530077C05RIK
PRPH1	ZBED4	OXNAD1	ZFP161
FBXO25	NFIL3	TICAM1	ARPC3
DOK4	USP52	CENTD1	SEMA4F
LIMD2	TAP2	MOD1	AI790298
LMBR1	1500041N16RIK	GAS2L1	HABP4
MYCN	ZDHHC7	OSGEP	BTF3L4
GBA2	SNUPN	KBTBD11	ZC3H12C
YME1L1	IDH1	RSU1	KRAS
GNB1	ZDHHC8	NUP93	DYNC1LI1
AP2M1	1110001A07RIK	6820408C15RIK	NOL10
ZFP87	ZBTB1	ZFAND1	HIST1H1C
COX6A2	TMEM1	PTPRA	ANUBL1
ZFP46	ZDHHC24	PDE9A	RPLP1
ZFP650	ELMOD2	HSD17B4	4921524J17RIK
HACE1	RPP30	S100A16	PHTF2
NCK2	SLC11A2	4930402E16RIK	DUSP10
PCTK2	GNG7	PPOX	GM1568
RBBP7	1110032O16RIK	C1S	TSR2
NAGK	SLC6A9	LACTB	DCUN1D1
HARS2	TMEM14C	2310076G13RIK	EIF4EBP2
TMEM118	EIF4E2	ABHD8	EXOC8
ATPBD3	VBP1	PER1	BMF
UCHL5	RAB31	BC035537	DNTTIP2
BTBD6	THAP2	EIF4EBP2	SYT12
MYL6B	MAP3K3	TRP53BP2	AVPI1
PIP5KL1	GSTP1	TEX2	ZFP407
GPSM1	MRPL36	HIVEP1	2010209O12RIK
A630054L15RIK	NUDT18	PPAP2A	TRIM16
USP43	D19WSU12E	B3BP	RAPGEF2
3110073H01RIK	PMVK	1810013L24RIK	IFNGR1
MYO9A	4933406E20RIK	AI842396	WDR70
EIF4A2	MRPL20	CCDC8	FBXO32
IKZF4	2810026P18RIK	PPM1B	PRR13
DLG4	FBXO28	MAGI2	RAD23B
BC037034	S100A6	2400006H24RIK	NXT1
LRRN2	2010305B15RIK	PAICS	WDR44
PLDN	SPOP	NRP1	BRE
DHPS	CD2BP2	CCDC13	AP1S2
WDR77	PES1	ADRA1A	TMEM163
CENTG3	BC010787	SNRK	MORN2
TMED8	RNASEH1	AXIN2	TSN
6330442E10RIK	2810423E13RIK	CRSP9	BIN3
C030044C12RIK	A230001M10RIK	AYTL2	WWC1
RNF14	FRMD4A	GNPDA2	MRC2
VAMP2	D630037F22RIK	PRKCN	ARHGEF18
4932438A13RIK	ATP2C1	COQ10B	BC057893
1500031L02RIK	AIG1	LRRC16	ABL1
5730419I09RIK	SNORD22	FZD8	PSMD5
PWWP2	BC026590	METT5D1	NCK1
AI875142	SSR2	ABCB9	2610039C10RIK
D15ERTD682E	2900024C23RIK	DHX40	NUBPL
VKORC1L1	AU040320	PTPMT1	PARD3B
FST	MTHFD2	TOR2A	VPS41
DNAJB6	CXCL12	ENO1	MRPL10
R3HDM2	DDX21	CAP2	STAT3
NAT14	CCNL2	PLOD2	2210403K04RIK
TLK1	TRP53INP2	D10JHU81E	WDR5
TNFAIP8L1	BRWD3	DTX1	DUT
ATP8B2	BRCC3	SUPV3L1	CCT8
RHOF	WDR41	C130075A20RIK	SLC25A39
ZFP444	PARC	PCK2	TMEM63A
HKDC1	NRXN1	PAG1	TXNL4
4933415E08RIK	CSNK1G3	MRPS35	GAS8
ABI2	HADHA	CPEB3	INTS12
TRPC3	CENPQ	BC017158	PTRH2
TSR2	2700007P21RIK	CPNE2	UBAP2
ARMCX3	MSL2L1	4833417J20RIK	NPHP1
HS6ST1	UBR2	MDK	COL5A3
PIGK	MBD5	1810021B22RIK	RUTBC3
CD99L2	CASK	GSR	PPAPDC2
ACTN2	LOC72849	SSR1	UTP11L
RGS9	WWP1	NCOR1	C330011K17RIK
STOML1	TDRKH	STCH	MCFD2
A230050P20RIK	GOSR1	TPX2	AEBP2
RABGEF1	2810008M24RIK	CEBPA	PCP2
TRIM33	PSMB2	CNIH4	PCK2
UBE2Z	VPS53	RPP14	PAK6
ATP13A2	SLC26A2	ZFP148	PSME2
USP13	PIAS4	RECK	EXOD1
GM632	6330503C03RIK	TNFAIP1	2310057M21RIK
NAP1L5	0610007L01RIK	RRS1	LTA4H
PAPOLG	MX2	USP19	MTHFD2
YLPM1	KIF16B	VAMP4	1500034J01RIK
D230025D16RIK	RPS3	ACO1	PSMC2
ARMC6	BCL7A	KCTD6	NUDCD3
IPO4	ANP32B	ARMC9	XPO1
AI503564	2510006D16RIK	ETFB	ARFGAP3
WDR68	JOSD3	PAQR3	ORC3L
YTHDF1	1810073N04RIK	DHX35	GTSE1
NDEL1	1110007L15RIK	HS2ST1	EIF2B2
KLHL22	PPP1CB	RAB22A	1110037F02RIK
GEMIN6	MLLT10	GSTZ1	DHFR
SRPK2	THOC6	RHOJ	MED28
CYP46A1	ARHGDIA	PRDX1	RGMB
LNP	ZFP410	ETOHI1	CREB3L2
KLHDC1	SH3BP5	TPST2	FOLR1
RABGAP1L	LBH	FOSB	UBE2G2
1810048J11RIK	PANK3	PITRM1	HAPLN4
HSDL1	TUBD1	RAB21	BCAP31
HIPK3	GDAP10	NT5C2	SIN3B
ATP6AP2	PDZD8	SCP2	SEC22B
C330023M02RIK	PCYT1A	SLC35B4	RASAL2
ACCN1	GNAI1	RTP4	DLGAP4
ITGA3	ARF4	EPS15	NEK9
DGKZ	DHFR	RPA1	ALG14
BC023055	ZCCHC11	TRPM7	SETD5
NEUD4	BC011248	ITGB8	EBP
GDI1	SLC16A13	SLC2A8	CCDC5
DSEL	E2F3	CCDC50	3110005G23RIK
SMARCAL1	ADAMTS2	2700008G24RIK	TCP1
SLC36A1	HUWE1	2700094F01RIK	ELF1
SLC24A3	1500035H01RIK	ST13	IDS
TPM1	LASS5	SIAE	MSL31
4933409K07RIK	2610003J06RIK	TOR1AIP1	EIF3S8
PPP1R11	AU021838	ASH1L	DBN1
2900018E21RIK	WARS	CENTD2	KAP
ACTR3	SGOL2	DHDH	ELP3
SLU7	KLHL5	ENDOG	UBE2B
TMEM183A	NISCH	SMPD1	PRPF4B
C330002I19RIK	ZFP292	OCRL	EG383438
CLIC5	ERO1L	CDC45L	SF3B3
DGKD	2610510J17RIK	ETAA1	EFTUD2
PREP	TSHZ1	SOD2	ZBTB8OS
TNPO2	EAF1	KCNIP1	RAP1B
ZBTB45	TJP2	ING3	2510039O18RIK
ANK1	SEC13	INTS8	CCT7
RAB6	DNAJC17	ACOX1	MAPK1
OTUB1	PRKCSH	GRIN3A	RFX1
PDIK1L	ARD1	RNF6	SNHG8
LCMT1	6030465E24RIK	SKI	D130037M23RIK
CCNT2	FECH	DNMBP	PLEKHJ1
PVT1	GALNT3	PPM1K	RGS10
D4ERTD796E	TFDP1	TMEM43	PSMC1
FYTTD1	PLEK	4833428C12RIK	FCF1
PPA1	ACACA	CLCN2	MAD2L1BP
PARP6	NPAL3	DDB2	TRIM35
6330409N04RIK	TMEM62	GPM6A	SMAD6
ARHGDIB	BPNT1	TMEM135	SUSD2
2900083I11RIK	WSB2	NOL4	TTC9
FBXO9	BLZF1	TLE1	RAD50
NNMT	MTHFSD	EIF5	ATBF1
SFRS7	NARF	TECTB	APRT
WDR48	HADH	ADAM17	TTLL1
TERF2	TMEM55B	ANAPC10	ZFP622
MARVELD1	SUHW3	SNHG8	CHEK2
A930011O12RIK	LSM5	PGM3	TALDO1
CLSTN1	HRB	FKBP14	NVL
PDZD4	AP1GBP1	BBS2	AI843639
DENR	TFB1M	FNBP1	CDK5RAP3
COPG	LSM14A	PIGM	RAB8B
SETD4	6330416L07RIK	2310051E17RIK	D4ST1
EID2	0610006I08RIK	SNAPC2	GNG8
ITSN1	CNTD1	TMEM185B	6330548G22RIK
PSIP1	D430041D05RIK	EDD1	RAB5A
DOC2G	EIF2C1	USP40	ZFP462
PWP2	PHF20L1	CHST10	TRIM24
SEC23A	NFATC2IP	PEX7	PAK1
CHMP2B	LIG3	DCAMKL2	HDAC1
ETV6	RBMX	MMD	ASCC2
TRPM2	ITSN2	ARMC8	SAV1
ARMC10	ATP6V1G1	NSDHL	CCDC92
2310005N01RIK	SSR4	XRCC5	B630005N14RIK
PPP2R5E	7120426M23RIK	PRDX4	ARF4
NDUFA10	CDH10	IQGAP1	SCRN3
C530024P05RIK	CYP4F16	NDUFS4	TBCC
ATP6V0C	D130037M23RIK	KCTD15	1700054N08RIK
TLN2	CSRP2BP	USP1	TUBG1
CCDC32	TLE2	DAB2	WWP1
TSNAX	AKR1B3	ZFP383	ERCC3
NARS	CLN3	QK	D8ERTD457E
2010305A19RIK	SFRS12	TUBB6	AI314027
ITFG1	MPHOSPH6	GCDH	MAPKAPK3
0610007P22RIK	SEC24C	PAFAH2	D16ERTD472E
ASXL1	BC002059	1300012G16RIK	1810022K09RIK
TUBA1B	NKTR	GRID2	TMEM160
RPL23	ATPAF1	QSER1	5330426P16RIK
DNAJA1	0610040B10RIK	DLD	ADAR
APPBP1	DCP1A	2310056P07RIK	FBXL14
NFX1	TXNL1	THA1	BZW1
CCL4	SFRS16	ZBTB7C	SRP14
DKKL1	TNFRSF21	GOLPH3	MSTO1
MAX	RPP40	MXD4	BRUNOL4
1500031H01RIK	RASAL2	HIST2H3C1	STAM2
1110002E22RIK	ZFP445	RAP2B	6330505N24RIK
CDKN2D	CDADC1	BC023829	SYAP1
CD3EAP	BC022623	HPXN	STX17
TRAPPC5	MLH3	ANKRD40	NAT9
5830434P21RIK	PLCG2	B230354K17RIK	TCTA
PLXDC1	ZFP650	TMPO	SLC39A1
TRPM4	E030031F02RIK	SBNO2	2700060E02RIK
ZSWIM1	R3HDM1	POLA1	CCDC91
EPM2AIP1	FUBP3	FUSIP1	GM22
RLF	NVL	BC031748	AP3S2
MCTS1	MTIF2	IQCE	HDGF
SAE1	AW112037	PTGFRN	LAMA4
IFT88	NFATC3	NBEAL1	BIN1
ARPC3	GMCL1	SKP2	RAB7L1
FKBP3	D14ERTD231E	NUDT19	1110051M20RIK
AP1G1	5930434B04RIK	EIF1AY	1110006O17RIK
PTPN5	4930432O21RIK	RILP	WDR36
ADARB1	GNPAT	LPHN3	EIF4B
SLC9A6	STK11IP	D5ERTD585E	RDH10
2310003L22RIK	TMED7	ACAD8	STK3
PBX2	SLC26A11	SLC25A29	PLEKHH1
IFNGR2	D130059P03RIK	TMEM30A	6330577E15RIK
KLHL12	PSMB6	1200014M14RIK	FBXO42
4930445K14RIK	D6WSU176E	DTX3L	UBOX5
GPATC4	DOPEY2	RFXANK	MAPK8IP2
KRT73	AW047464	STAG1	HDAC7A
GLE1L	LYSMD3	4930523C07RIK	2310038H17RIK
9430067K14RIK	AI035719	IRF3	PITPNA
ZFAND5	4930599N23RIK	SP1	PET112L
DGKE	2010321M09RIK	CCNB1-RS1	DDX21
DDX5	PSAT1	PYCRL	GTPBP3
HSBP1	OSTM1	SGIP1	CSNK1G2
CROCC	5530601H04RIK	CD14	ERGIC1
FIBCD1	CHURC1	EXOSC3	MTVR2
TBC1D25	RAB40C	RNASE10	COPG
PHF13	DDX59	ACTA2	MRPL39
ARFIP2	ATF6	GPX7	HS6ST1
LIMK2	1600012H06RIK	ERN1	SNX9
9130011J15RIK	OSBP	RBP1	RAB22A
STC1	ATR	ELP4	DRCTNNB1A
GNE	5033428A16RIK	1700017B05RIK	LOC671237
ZFP622	ANKRD26	M6PRBP1	EIF2S2
PEX5	4732479N06RIK	GPR126	KIF3B
[truncated: 619 more rows]

## Sheet: Verhaak et al
VERHAAK_GLIOBLASTOMA_CLASSICAL	VERHAAK_GLIOBLASTOMA_NEURAL	VERHAAK_GLIOBLASTOMA_PRONEURAL	VERHAAK_GLIOBLASTOMA_MESENCHYMAL
ABCD2	ACSL4	ABAT	ACP3
ACSBG1	ACYP2	ACTR1A	ACSL1
ACSL3	ADD3	ADGRB3	ADAM12
ACSS3	AGTPBP1	ADGRL3	ALDH3B1
ADAM19	AKR7A3	ALCAM	ALOX5
ADGRE5	ANKRD46	AMOTL2	AMPD3
ADGRG1	ANKS1B	ARHGAP33	ANXA1
AKT2	ANXA3	ARHGEF9	ANXA2
ANXA5	ANXA7	ASCL1	ANXA4
APBA3	ARRB1	ATAD5	ARHGAP29
ARAP2	ATP5MG	ATAT1	ARPC1B
ARAP3	ATP5PB	ATP1A3	ARSJ
ARNTL	ATRNL1	BCAN	ASL
B3GALT1	BASP1	BCL7A	BATF
BLM	BCAS1	BCOR	BDKRB2
BTBD2	BEST1	BEX1	BLVRB
CALM1	CA4	C1orf61	BNC2
CAMK2B	CALM2	C1QL1	C1orf54
CARMIL1	CAMK2G	CA10	C5AR1
CC2D1A	CASQ1	CAMSAP2	CASP1
CD151	CCDC121	CASK	CASP4
CD3EAP	CCK	CBX1	CASP5
CDH2	CDC42	CDC25A	CASP8
CDH4	CDR1	CDC7	CAST
CDH6	CHN1	CDK5R1	CAVIN1
CDK6	CLCA4	CDKN1B	CCR5
CLIP2	COX5B	CELF3	CD14
CREB5	CPNE6	CHD7	CD2AP
DAG1	CRBN	CILK1	CD4
DENND2A	CRYL1	CKB	CDCP1
DLC1	CRYM	CLASP2	CEBPB
DMWD	CRYZL1	CLGN	CHI3L1
DOCK6	CUTC	CNTN1	CLCF1
EGFR	CYRIB	CRB1	CLEC2B
ELOVL2	CYTH1	CRMP1	CLIC1
EPHB4	DHRS9	CSNK1E	CNN2
ERCC2	DYNC1I1	CSPG5	COL1A1
EXTL3	EDIL3	CXXC4	COL1A2
EYA2	ENPP2	DBN1	COL5A1
FBXO17	ENPP4	DCAF7	COL8A2
FGFR3	EPB41L3	DCX	COLGALT1
FZD3	ETNPPL	DGKI	COPZ2
FZD7	EVI2A	DLL3	CPQ
GALNT4	FBXO3	DNM3	CRYBG1
GARRE1	FEZF2	DPF1	CSTA
GAS1	FHIT	DPP6	CTSB
GJA1	FUT9	DPYSL4	CTSC
GLG1	FXYD1	DUSP26	CTSZ
GLI2	GABARAPL2	E2F3	CYBRD1
GNAS	GABRB2	EPB41	CYTH4
GNG7	GNAI1	EPHB1	CYTIP
GRIK1	GPR22	ERBB3	DAB2
GRIK5	GRM1	FAM110B	DCBLD2
GSTK1	GRM3	FBXO21	DOK3
HMG20B	GUK1	FERMT1	DRAM1
HS3ST3B1	HPCA	FGF9	DSC2
HSPBP1	HPCAL4	FHOD3	DSE
ILK	HPRT1	FLRT1	EFEMP2
IRF3	IMPA1	FXYD6	EHD2
IRS2	KCNJ3	GABRA3	ELF4
ITGA7	KCNK1	GADD45G	EMP3
ITGB8	LYRM1	GNG4	ENG
JAG1	LYRM9	GPM6A	FCGR2A
JUND	MAGEH1	GPR17	FCGR2B
KCNF1	MAT2B	GRIA2	FES
KEAP1	MBP	GRID2	FHL2
KLHDC8A	MDH1	GSK3B	FHOD1
KLHL25	MGST3	GSTA4	FMNL1
KLHL4	MMD	HDAC2	FNDC3B
LAMB2	MORF4L2	HMGB3	FOLR2
LFNG	MRPL49	HOXD3	FPR3
LHFPL6	MSRB2	IL1RAPL1	FURIN
LMO2	MYBPC1	INAVA	FXYD5
LRFN3	NANOS1	JADE3	GCNT1
LRP10	NDRG2	JPT1	GNA15
LRP5	NDUFS3	KAT7	GRN
MAB21L1	NSL1	KDM1A	HEXA
MCC	NTSR2	KIF21B	HEXB
MEGF8	ORC4	KLRC3	HFE
MEIS1	PARP8	KLRC4	HK3
MEOX2	PDE6D	KLRK1	ICAM3
MLC1	PEX11B	LPAR4	IFI30
MYO5C	PEX19	LRP6	IGFBP6
NDP	PGBD5	LRRTM4	IL15RA
NES	PLCL1	MAP2	IL1R1
NOS2	POPDC3	MAPT	IL4R
NPAS3	PPA1	MARCKS	IQGAP1
NPEPL1	PPFIA2	MARCKSL1	ITGA4
NR2E1	PPP1R1A	MAST1	ITGA5
NR2F6	PPP2R5A	MATR3	ITGAM
OSBPL3	PRPSAP2	MCM10	ITGB2
PCSK5	REPS2	MLLT11	KYNU
PDGFA	RERGL	MMP15	LAIR1
PEPD	RND1	MMP16	LAMB1
PIPOX	ROGDI	MPPED2	LAPTM5
PLA2G5	S1PR1	MTSS1	LCP1
PLIN3	SAR1A	MVB12B	LCP2
PMP22	SCHIP1	MYB	LGALS1
POFUT1	SELENOP	MYO10	LGALS3
POMT2	SELENOW	MYT1	LHFPL2
PRKD2	SERPINI1	NCALD	LILRB2
PRPF31	SGK3	NCAM1	LILRB3
PTPN14	SH3GL2	NKAIN1	LOX
PTPRA	SH3GL3	NKX2-2	LRRFIP1
QTRT1	SHTN1	NLGN3	LTBP1
R3HDM4	SIRT5	NOL4	LTBP2
RASGRP1	SLC16A7	NR0B1	LY75
RBCK1	SLC30A10	NRXN1	LY96
RBM42	SLC31A2	NRXN2	MAFB
RFX2	SLCO1A2	OLIG2	MAN1A1
RFXANK	SNCG	P2RX7	MAN2A1
RGS12	SNX11	PAFAH1B3	MAN2B1
RGS6	SPAST	PAK3	MAPK13
RIN1	TCEAL1	PAK5	MCUB
SARS2	TCEAL2	PCDH11X	MFSD1
SCAMP4	THTPA	PCDH11Y	MGAT1
SEMA6A	TMEM144	PDE10A	MGST2
SEMA6D	TPM3	PELI1	MRC2
SEPTIN11	TSNAX	PFN2	MS4A4A
SHFL	TTC1	PHLPP1	MSR1
SHOX2	TTPA	PLAAT1	MVP
SIPA1L1	UGT8	PLCB4	MYH9
SLC12A4	UROS	PODXL2	MYO1F
SLC2A10	USP33	PPM1D	MYOF
SLC4A4	VIP	PPM1E	NCF2
SLC6A11	VSX1	PURG	NCF4
SLC6A9	YPEL5	RAB33A	NOD2
SMO	ZSCAN31	RAD21	NPC2
SNTA1		RALGPS1	NRP1
SOCS2		RALGPS2	P4HA2
SOX9		RAP2A	PDPN
SPRY2		RBPJ	PHF11
SSH3		REEP1	PIGP
TBX2		REXO5	PLA2G15
TEAD3		RNFT2	PLAU
TGFB3		RUFY3	PLAUR
TGIF2		SATB1	PLBD1
TLE2		SCG3	PLK3
TMED1		SCN3A	PLS3
TMEM147		SEC61A2	POLD4
TMEM161A		SEZ6L	PROCR
TRIB2		SLC1A1	PTGER4
TRIP6		SLCO5A1	PTPN22
VAV3		SORCS3	PTPN6
VPS16		SOX10	PTPRC
WSCD1		SOX11	PYGL
ZFHX4		SOX2	RAB11FIP1
ZNF112		SOX4	RAB27A
ZNF134		SPTBN2	RAB32
ZNF20		SRGAP3	RABGAP1L
ZNF211		STMN1	RAC2
ZNF227		STMN4	RBKS
ZNF235		TAF5	RBM47
ZNF264		TMCC1	RBMS1
ZNF304		TMEFF1	RELB
ZNF419		TMEM35A	RHOG
ZNF446		TMSB15A	RRAS
ZNF45		TOP2B	RUNX2
ZNF606		TOPBP1	S100A11
ZNF671		TOX3	S100A13
ZNF8		TSPAN3	S100A4
		TTC3	SAT1
		TTYH1	SCPEP1
		VAX2	SEC24D
		VEZF1	SERPINA1
		WASF1	SERPINE1
		YPEL1	SFT2D2
		ZC4H2	SH2B3
		ZEB2	SHC1
		ZFP69B	SIGLEC7
		ZNF184	SIGLEC9
		ZNF248	SLAMF8
		ZNF286A	SLC10A3
		ZNF510	SLC11A1
		ZNF711	SLC16A3
		ZNF804A	SP100
		ZNF821	SQOR
			SRPX2
			ST14
			STAB1
			STAT6
			STXBP2
			SWAP70
			SYNGR2
			SYPL1
			TCIRG1
			TEC
			TES
			TGFBI
			TGFBR2
			TGOLN2
			THBD
			THBS1
			THEMIS2
			TIMP1
			TLR2
			TLR4
			TMBIM1
			TNFAIP3
			TNFAIP8
			TNFRSF11A
			TNFRSF1A
			TNFRSF1B
			TRADD
			TRIM22
			TRIM38
			TRPM2
			TYMP
			UAP1
			UCP2
			VAMP5
			VDR
			WIPF1
			WWTR1
			YAP1
			ZNF217

## Sheet: Richards et al & Garofano et al
Richards_Developmental_GSC	Richards_Inflammatory wound response_GSC	Garofano_GPM	Garofano_MTC
LINC00115	FAM87B	PLXND1	NDUFA2
KLHL17	PLEKHN1	WIPF1	C7orf55
HES4	ISG15	PLAUR	UQCRQ
LINC01342	TNFRSF18	CTSB	LOC388965
SCNN1D	MXRA8	ITGA5	MED31
ACAP3	MRPL20	MYH9	COX7B
PUSL1	LOC115110	MGAT1	UQCR
CCNL2	TNFRSF14	FOSL2	LOC391356
MMP23A	MEGF6	MVP	DPM3
SLC35E2B	TPRG1L	GRN	NDUFB7
CFAP74	SMIM1	TGFBR2	CIB3
GABRD	CEP104	APLP2	C20orf52
PRKCZ	C1orf174	TCIRG1	LOC554207
PANK4	RNF207	IL4R	RPL27
HES5	ICMT	LHFPL2	ATP5J2
WRAP73	ACOT7	TNFRSF1B	NDUFA4
TP73	NOL9	KIAA0247	PFDN5
DFFB	KLHL21	URP2	P117
PER3	VAMP3	C1orf38	MPZL3
CA6	UTS2	MAPKAPK2	MRPS15
LOC100506022	TNFRSF9	RHOG	NDUFB1
SLC25A33	ERRFI1	GLT25D1	NDUFA7
TMEM201	SLC2A5	DOK3	UBL5
CTNNBIP1	H6PD	FN1	TIMM8B
KIF1B	SPSB1	TBC1D22A	ACYP2
PTCHD2	PIK3CD	LTBP2	C17orf61
MAD2L2	RBP7	FLII	ALKBH7
RNU5E-1	APITD1	ADAM12	NFU1
MIIP	DFFA	FURIN	SNRPG
PRDM2	FBXO2	MAN2B1	PRSS22
TMEM51-AS1	NPPA-AS1	S100A11	SEPW1
TMEM51	KIAA2013	METRNL	MRPL54
UQCRHL	PLOD1	RIN3	UNQ2541
FLJ37453	TNFRSF8	IL10RA	N6AMT2
SPEN	TNFRSF1B	P4HB	CCL16
CLCNKA	DHRS3	THBD	COX6A1
SPATA21	MIR6730	GAA	MORN2
CROCCP3	EFHD2	C5AR1	ZNHIT1
NBPF1	DNAJC16	PARVG	PRAP1
CROCCP2	AGMAT	COL5A1	AQP10
MST1P2	FBLIM1	MYO1F	COX5B
MST1L	CLCNKB	IL13RA1	TMPRSS6
IGSF21	EPHA2	PTPRJ	SLC12A3
AKR7L	MFAP2	DAB2	PRSSL1
AKR7A3	ATP13A2	NRP1	CRB3
LOC100506730	PADI2	SIGLEC7	C2orf7
RAP1GAP	PADI1	ELL	LOC790955
WNT4	PADI3	TNFAIP3	C19orf53
C1orf234	PADI4	HCLS1	MRPL34
ZNF436-AS1	ACTL8	FES	MED28
E2F2	KLHDC7A
PDIK1L	IFFO2
FAM110D	EMC1
CNKSR1	CAPZB
LOC101928324	NBL1
ARID1A	TMCO4
TRNP1	UBXN10
TMEM222	CDA
RPA2	PINK1-AS
PHACTR4	DDOST
RNU11	ECE1
SDC3	LDLRAD2
NKAIN1	HSPG2
SERINC2	EPHB2
COL16A1	LUZP1
ADGRB2	HTR1D
MIR4254	ZNF436
CCDC28B	TCEA3
IQCC	FUCA1
MARCKSL1	IFNLR1
FAM229A	NCMAP
ZBTB8B	CLIC4
RBBP4	LDLRAP1
S100PBP	PAQR7
FNDC5	SH3BGRL3
HPCA	CD52
ZNF362	AIM1L
DLGAP3	SFN
AGO4	GPN2
TEKT2	SLC9A1
GRIK3	IFI6
MEAF6	SMPDL3B
MIR5581	SNORA73A
DNALI1	SNORA73B
EPHA10	RAB42
MANEAL	TMEM200B
INPP5B	PTPRU
NT5C1A	TINAGL1
HPCAL4	SPOCD1
MYCL	TMEM234
PPT1	LCK
RLF	HDAC1
ZNF684	ZBTB8OS
RIMS3	SYNC
NFYC-AS1	KIAA1522
KCNQ4	GJB3
FOXO6	ZMYM6NB
RIMKLA	PSMB2
CCDC30	COL8A2
YBX1	MAP7D1
LOC100129924	EVA1B
LOC339539	LINC01137
C1orf210	ZC3H12A
KDM4A	RHBDL2
ST3GAL3	MACF1
ERI3	KIAA0754
ERI3-IT1	MFSD2A
PTCH2	CAP1
ZSWIM5	CITED4
LINC01144	EDN2
RPS15AP10	HIVEP3
PIK3R3	ZMYND12
FOXE3	PPCS
SKINTL	P3H1
SPATA6	SLC2A1
AGBL4	TMEM125
BEND5	ELOVL1
ELAVL4	MED8
RAB3B	KDM4A-AS1
TXNDC12	ARTN
BTF3L4	KLF17
ZFYVE9	PLK3
PRPF38A	TCTEX1D4
ZCCHC11	BTBD19
FAM159A	TESK2
ZYG11B	PRDX1
CPT2	TSPAN1
C1orf123	DMBX1
LRP8	MKNK1
CDCP2	MOB3C
CYB5RL	CYP4X1
SSBP3	PDZK1IP1
SSBP3-AS1	CMPK1
PARS2	FOXD2
USP24	TRABD2B
PPAP2B	OSBPL9
JUN	CC2D1B
LOC101926964	ECHDC2
NFIA	PODN
EFCAB7	SLC1A7
DLEU2L	DHCR24
CACHD1	PCSK9
RAVER2	TACSTD2
LINC01359	LINC01358
MIR3671	NFIA-AS2
PDE4B	KANK4
GNG12-AS1	DOCK7
RPE65	ROR1
CTH	ROR1-AS1
FPGT-TNNI3K	JAK1
SAMD13	LEPROT
LMO4	SLC35D1
BARHL2	GNG12
HFM1	DIRAS3
CDC7	DEPDC1
LOC100996635	DEPDC1-AS1
LPPR5	LRRC7
LOC100129620	PTGER3
AMY2B	NEGR1
LOC100129138	LRRIQ3
VAV3	ERICH3
AKNAD1	CRYZ
SPATA42	TYW3
GPSM2	SLC44A5
CLCC1	PIGK
WDR47	AK5
SCARNA2	ZZZ3
C1orf194	NEXN-AS1
CELSR2	NEXN
PSRC1	FUBP1
MYBPHL	DNAJB4
ATXN7L2	GIPC2
AMIGO1	PTGFR
GPR61	IFI44L
GSTM4	IFI44
STRIP1	LOC101927560
LAMTOR5-AS1	CTBS
PROK1	SSX2IP
KCNA2	MCOLN2
KCNA3	MCOLN3
DRAM2	WDR63
OVGP1	SYDE2
C1orf162	BCL10
FAM212B	LOC646626
FAM212B-AS1	CYR61
KCND3	ZNHIT6
KCND3-IT1	COL24A1
LOC643355	ODF2L
LINC01356	CLCA2
LOC100996251	GBP3
RSBN1	GBP1
BCL2L15	GBP2
HIPK1-AS1	GBP7
TRIM33	GBP4
SIKE1	GBP5
IGSF3	GBP6
CD101	GBP1P1
WARS2-IT1	LRRC8C
PFN1P2	EPHX4
SRGAP2C	GFI1
SRGAP2B	DR1
GNRHR2	BCAR3
RBM8A	GCLM
LIX1L	ABCA4
POLR3GL	ARHGAP29
NBPF11	LINC01057
MIR5087	SLC44A3
LOC100132057	CNN3
LINC00869	TMEM56
SV2A	TMEM56-RWDD3
VPS45	DPYD
PLEKHO1	MIR137HG
CA14	MIR2682
APH1A	LOC729987
CIART	SNX7
RPRD2	FRRS1
TARS2	HIAT1
MIR6878	RTCA
FALEC	VCAM1
SETDB1	SLC30A7
PRUNE	COL11A1
BNIPL	LOC101928436
CDC42SE1	NTNG1
SEMA6C	SLC25A24
LYSMD1	TAF13
TMOD4	GNAT2
VPS72	GSTM5
ZNF687	CSF1
GBAT2	SLC16A4
POGZ	DENND2D
SNX27	CHI3L2
CELF3	TMIGD3
RIIAD1	ADORA3
TDRKH	LINC01160
RORC	CTTNBP2NL
CHTOP	WNT2B
SNAPIN	CAPZA1
NPR1	FAM19A3
SLC27A3	PTPN22
GATAD2B	OLFML3
DENND4B	DENND2C
CREB3L4	CSDE1
CHRNB2	TSPAN2
LENEP	NGF
DCST2	VANGL1
LOC100505666	MAB21L3
EFNA3	TTF2
EFNA1	FAM46C
MIR92B	SPAG17
GBAP1	TBX15
CLK2	LOC101929147
HCN3	SEC22B
ASH1L-AS1	HIST2H2BA
MSTO2P	EMBP1
SYT11	LOC645166
ARHGEF2	PDZK1
UBQLN4	RNF115
MEX3A	PDIA3P1
SEMA4A	ACP6
SLC25A44	OTUD7B
PAQR6	CTSS
VHLL	CTSK
RHBG	ANXA9
C1orf61	GABPB2
MIR9-1	TUFT1
BCAN	LOC100132111
ARHGEF11	S100A10
KCNJ10	NBPF18P
KCNJ9	S100A11
ATP1A2	FLG-AS1
ATP1A4	KPRP
CASQ1	S100A7
NHLH1	S100A6
VANGL2	S100A4
USF1	LOC101928034
USP21	S100A3
PPOX	S100A2
ADAMTS4	S100A13
NDUFS2	RAB13
CFAP126	TPM3
FCGR2A	ATP8B2
HSPA6	IL6R
FCGR2C	SHE
HSPA7	SHC1
FCGR3B	SLC50A1
FCGR2B	GBA
RPL31P11	FAM189B
FCRLA	FDPS
FCRLB	LMNA
UCK2	GLMP
POGK	SH2D2A
TADA1	PEAR1
ILDR2	CD5L
MAEL	KIRREL
LINC01363	CD1D
POU2F1	SPTA1
CD247	IFI16
FMO2	DUSP23
GAS5-AS1	SLAMF8
ZBTB37	C1orf204
LOC101928696	VSIG8
MRPS14	CFAP45
TNN	SLAMF7
TNR	SH2D1B
LHX4	UHMK1
ACBD6	UAP1
STX6	DDR2
IER5	C1orf110
LOC101928973	RGS4
CACNA1E	RGS5
GLUL	CREG1
COLGALT2	RCSD1
C1orf21	DCAF6
SWT1	DPT
LOC102724919	LINC00626
LINC01351	NME7
CRB1	BLZF1
LOC101929224	SELP
CAMSAP2	SELL
GPR25	SELE
C1orf106	LOC101928650
KIF21B	PRRX1
NAV1	MROH9
SHISA4	METTL13
GPR37L1	DNM3OS
ARL8A	TNFSF18
PPP1R12B	TNFSF4
SYT2	PRDX6
LOC148709	PAPPA2
KLHL12	LOC730102
TMEM183A	RASAL2-AS1
MYOG	RASAL2
CHIT1	ABL2
LINC01353	SOAT1
LINC01136	FAM163A
BTG2	QSOX1
PRELP	FLJ23867
OPTC	LAMC2
PIK3C2B	NCF2
MDM4	ARPC5
LRRN2	TRMT1L
KLHDC8A	HMCN1
MFSD4	PRG4
RAB29	PTGS2
SLC41A1	PACERR
SRGAP2	RGS1
CAMK1G	GLRX2
MIR3122	CDC73
LOC101929541	LINC01031
TMEM206	CFH
NSL1	CFHR1
TATDN3	NEK7
FLVCR1	PTPRC
ANGEL2	NR5A2
PROX1-AS1	PKP1
PROX1	TNNT2
KCTD3	LAD1
RAB3GAP2	CSRP1
MARK1	RPS10P7
C1orf115	TIMM17A
MARC2	RNPEP
LOC101927164	ELF3
LEFTY1	CYB5R1
PARP1	LOC101929441
ADCK3	LINC00628
ZNF678	RBBP5
RNF187	NUAK2
RHOU	CDK18
DUSP5P1	SLC45A3
CCSAP	SLC26A9
NUP133	CTSE
ABCB10	IKBKE
URB2	DYRK3
PGBD5	MAPKAPK2
COG2	IL24
AGT	PIGR
CAPN9	CD55
FAM89A	CR2
TRIM67	CR1L
C1orf131	CD46
GNPAT	CD34
DISC1	G0S2
DISC1-IT1	HSD11B1
LOC101927765	SERTAD4-AS1
TOMM20	SERTAD4
GNG4	HHAT
GPR137B	VASH2
ACTN2	PTPN14
LOC339529	TGFB2
COX20	MIR548F3
HNRNPU-AS1	EPRS
LOC101928068	HLX
EFCAB2	C1orf140
ZNF670	AIDA
ZNF669	DISP1
ZNF124	TLR5
MIR3916	CCDC185
ZNF496	CAPN2
ZNF672	FBXO28
ZNF692	DEGS1
ZMYND11	CNIH4
DIP2C	CNIH3
ADARB2	ACBD3
ASB13	WNT9A
ANKRD16	GJC2
CELF2	MIR7641-2
DHTKD1	KIAA1804
SEC61A2	KCNK1
CAMK1D	LINC00184
PHYH	LOC101927851
SEPHS1	LINC01348
BEND7	NID1
FAM107B	EDARADD
ACBD7	RYR2
STAM-AS1	LOC100130331
NSUN6	ZP4
ENKUR	GREM2
LINC00836	KMO
LINC00202-1	MAP1LC3C
ACBD5	ADSS
GOLGA2P6	KIF26B
ZEB1-AS1	TFB2M
ZEB1	PFKP
EPC1	PITRM1
ZNF33BP1	LINC00702
ZNF25	LINC00704
LOC100129055	AKR1C3
ZNF37BP	CALML3-AS1
RET	IL15RA
ZNF32-AS2	PFKFB3
TMEM72-AS1	LINC00707
RSU1P2	ITIH2
AGAP4	GATA3-AS1
PARGP1	GATA3
FAM35BP	SFTA1P
GLUD1P7	ECHDC3
BMS1P5	PROSER2-AS1
FAM35DP	OPTN
VSTM4	FRMD4A
AGAP6	OLAH
ASAH2	NMT2
CSTF2T	RSU1
PCDH15	VIM-AS1
LINC00844	ST8SIA6
CCHE1	HACD1
PHYHIPL	NEBL
LRRTM3	NEBL-AS1
ATOH7	CASC10
TET1	LOC100499489
STOX1	C10orf67
TSPAN15	KIAA1217
LRRC20	YME1L1
EIF4EBP2	LRRC37A6P
PALD1	ARMC4
USP54	MPP7
SYNPO2L	SVIL
GLUD1P3	SVILP1
SFTPA2	ITGB1
NUTM2B	NRP1
TMEM254-AS1	BMS1
LOC102723703	RASGEF1A
SH2D4B	C10orf10
GRID1	TIMM23
BMPR1A	ARHGAP22
NUTM2D	CHAT
CFL1P1	PRKG1-AS1
PANK1	DKK1
HECTD2	LINC01468
PPP1R3C	BICC1
FGFBP3	CCDC6
BTAF1	RHOBTB1
TBC1D12	TMEM26
ENTPD1	TMEM26-AS1
ENTPD1-AS1	ARID5B
C10orf131	ZNF365
CC2D2B	NRBF2
RPL13AP5	REEP3
SLIT1	ANXA2P3
ARHGAP19-SLIT1	HERC4
FRAT2	MYPN
MORN4	DDX50
SEC31B	DDX21
SEMA4G	VPS26A
LBX1	SUPV3L1
LBX1-AS1	LOC101928994
FGF8	COL13A1
KCNIP2	AIFM2
PSD	SAR1A
C10orf95	ADAMTS14
TMEM180	UNC5B
AS3MT	UNC5B-AS1
NEURL1	C10orf54
SORCS3	CHST3
MXI1	DNAJB12
PDCD4-AS1	MCU
LOC103344931	PLA2G12B
HABP2	P4HA1
DCLRE1A	ECD
ADRB1	DNAJC9-AS1
WDR11-AS1	ANXA7
PSTK	PPP3CB
HMX3	PPP3CB-AS1
HMX2	C10orf55
FLJ37035	PLAU
C10orf90	VCL
FAM196A	ADK
LINC01163	KCNMA1
DPYSL4	DLG5-AS1
STK32C	POLR3A
LRRC27	LINC00856
LINC01166	ZMIZ1-AS1
ADGRA1-AS1	MBL1P
ADGRA1	ANXA11
LINC01001	LINC00857
SIRT3	GHITM
B4GALNT4	WAPL
DEAF1	MMRN2
BRSK2	SNCG
DUSP8	ADIRF
IGF2-AS	AGAP11
CD81-AS1	PAPSS2
KCNQ1	RNLS
CDKN1C	ANKRD22
SNORA54	FAS
ZNF195	CH25H
CCKBR	IFIT3
APBB1	SLC16A12
DCHS1	LINC00865
LOC100506258	HTR7
PPFIBP2	ANKRD1
RIC3	IDE
LMO1	CYP26C1
DENND5A	CYP26A1
LOC644656	MYOF
SNORD97	CEP55
LOC101928053	RBP4
PDE3B	SLC35G1
CALCB	PLCE1-AS1
SOX6	PDLIM1
NCR3LG1	TLL2
KCNJ11	PIK3AP1
KCNC1	C10orf12
PTPN5	EXOSC1
NAV2-AS4	ZDHHC16
LUZP2	ANKRD2
FIBIN	PI4K2A
BBOX1	AVPI1
LOC105376671	MARVELD1
BDNF-AS	SFRP5
MPPED2	R3HCC1L
ELP4	LOXL4
LINC00294	PYROXD2
LMO2	HPS1
LDLRAD3	MIR4685
TRAF6	ENTPD7
C11orf96	ABCC2
LOC101928812	ERLIN1
CRY2	SCD
MAPK8IP1	KAZALD1
PHF21A	GBF1
DGKZ	NFKB2
CHRM4	SFXN2
LRP4-AS1	NT5C2
LRP4	SH3PXD2A
MADD	SH3PXD2A-AS1
NDUFS3	OBFC1
C1QTNF4	SLK
FOLH1	COL17A1
LOC440040	SFR1
P2RX3	GSTO1
RTN4RL2	ITPRIP
YPEL4	CFAP58
OOSP1	LOC101927523
VWCE	SMNDC1
PPP1R32	DUSP5
LRRC10B	RBM20
DAGLA	SHOC2
ASRGL1	ACSL5
ZBTB3	VTI1A
TAF6L	PLEKHS1
RNU2-2P	CCDC186
SNORD22	FAM160B1
SNORD31	TRUB1
SNORD26	GFRA1
SNORD25	PNLIPRP3
CHRM1	CACUL1
RTN3	NANOS1
C11orf95	PRDX3
RCOR2	GRK5
MACROD1	RGS10
FLRT1	BAG3
KCNK4	SEC23IP
LOC100996455	WDR11
NRXN2	PLEKHA1
RASGRP2	ARMS2
TIGD3	HTRA1
SSSCA1-AS1	DMBT1
KCNK7	C10orf88
KAT5	CHST15
SNX32	OAT
GAL3ST3	LINC00601
CNIH2	CLRN3
B4GAT1	ADAM8
LRFN4	ECHS1
LOC100130987	BET1L
SUV420H1	RIC8A
SHANK2	IFITM2
ALG1L9P	IFITM1
ZNF705E	IFITM3
LRTOMT	PKP3
INPPL1	ANO9
CLPB	LRRC56
PDE2A	RASSF7
ATG16L2	IRF7
FCHSD2	EPS8L2
FAM168A	PNPLA2
PAAF1	CRACR2B
UCP3	CD151
MAP6	POLR2L
LOC100506127	TSPAN4
KCTD14	MUC6
NDUFC2	MUC2
GAB2	MUC5AC
LOC101928989	IFITM10
FAM181B	CTSD
PRCP	SYT8
PCF11	TSPAN32
DLG2	SLC22A18AS
CREBZF	PHLDA2
GRM5	OSBPL5
FAT3	NUP98
SLC36A4	RHOG
SNORA25	TRIM21
SNORA32	HBE1
SNORA1	TRIM6
SNORA8	FAM160A2
SNORD5	PRKCDBP
ANKRD49	SMPD1
FAM76B	MRPL17
ARHGAP42	GVINP1
TMEM133	CYB5R2
GRIA4	NLRP10
KBTBD3	AKIP1
ELMOD1	SCUBE2
SLN	SWAP70
ARHGAP20	LOC440028
COLCA1	ADM
COLCA2	AMPD3
TEX12	CTR9
LOC283140	EIF4G2
LOC101928847	MICAL2
NCAM1	PARVA
ANKK1	TEAD1
TMPRSS5	RRAS2
ZBTB16	COPB1
BACE1-AS	PSMA1
DSCAML1	INSC
FXYD6	C11orf58
SLC37A4	PLEKHA7
USP2	OR7E14P
USP2-AS1	NUCB2
TMEM136	TPH1
GRIK4	SAA2
TECTA	SAA1
LOC100507283	HPS5
ROBO3	GTF2H1
HEPN1	LDHA
HEPACAM	SPTY2D1
CCDC15	ZDHHC13
TMEM218	CSRP3
PKNOX2	E2F8
FEZ1	LOC100126784
LOC403312	NAV2-AS2
DDX25	HTATIP2
LOC101929653	FANCF
LOC646522	SVIP
MIR4697HG	BBOX1-AS1
JAM3	BDNF
VPS26B	KIF18A
THYN1	METTL15
ACAD8	DCDC5
GLB1L2	RCN1
B3GAT1	EIF3M
LOC283177	CCDC73
LOC100288778	PRRG4
SLC6A12	HIPK3
LOC101929384	CD59
NINJ2	CAPRIN1
RAD52	ABTB2
CACNA1C-AS2	ELF5
LOC283440	EHF
LOC100507424	APIP
PRMT8	LOC100507144
THCAT155	CD44
PARP11	PAMR1
CCND2-AS1	TRIM44
CCND2	API5
TIGAR	SEC14L1P1
GALNT8	ACCS
IFFO1	EXT2
CHD4	SLC35C1
ING4	MDK
PIANP	ATG13
PTMS	SLC39A13
GPR162	PTPRJ
LRRC23	TNKS1BP1
ENO2	SERPING1
PEX5	CLP1
FAM66C	ZDHHC5
RIMKLB	LPXN
A2ML1	LOC101927204
PHC1	STX3
KLRG1	TCN1
LOC642846	CCDC86
DDX12P	TMEM109
CLEC2D	SLC15A3
KLRC3	CD6
KLRAP1	VPS37C
TAS2R14	CYB561A3
TAS2R50	TMEM138
BCL2L14	RPLP0P2
LOH12CR2	FADS1
DUSP16	AHNAK
GPR19	GANAB
CDKN1B	LBHD1
KIAA1467	BSCL2
PTPRO	TMEM179B
ST8SIA1	HRASLS5
SOX5	LGALS12
ITPR2	RARRES3
KLHL42	PLA2G16
TSPAN11	ATL3
DDX11-AS1	STIP1
ALG10B	FERMT3
KIF21A	NUDT22
ABCD2	DNAJC4
SLC2A13	FKBP2
LRRK2	RPS6KA4
MUC19	CDC42BPG
YAF2	EHD1
MIR7851	NAALADL1
DBX2	ZNHIT2
LINC00938	CAPN1
ARID2	CDC42EP2
ENDOU	FRMD8
SLC48A1	NEAT1
PFKM	SCYL1
ASB8	LTBP3
CCDC184	FAM89B
KANSL2	EHBP1L1
LOC100506125	MAP3K11
RND1	SIPA1
DDN	CFL1
LMBR1L	EFEMP2
TUBA1A	FOSL1
PRPH	DRAP1
C1QL4	EIF1AD
KCNH3	CATSPER1
TMBIM6	PACS1
BCDIN3D-AS1	CD248
BCDIN3D	RIN1
FAIM2	BRMS1
LOC101927292	ZDHHC24
ASIC1	C11orf86
SMARCD1	RHOD
DIP2B	KDM2A
CSRNP2	POLD4
POU6F1	CLCF1
DAZAP2	PITPNM1
SLC4A8	CDK2AP2
ACVR1B	UNC93B1
GRASP	ALDH3B1
NR4A1	TCIRG1
MIR6757	MIR6753
AAAS	C11orf24
PCBP2-OT1	GAL
MAP3K12	MTL5
CISTR	MRGPRF
CBX5	MRGPRF-AS1
ZNF385A	TPCN2
NCKAP1L	MYEOV
NEUROD4	CCND1
TMEM198B	ORAOV1
ERBB3	ANO1-AS2
ZC3H10	ANO1
SMARCC2	FADD
CS	PPFIA1
PAN2	CTTN
TIMELESS	FAM86C1
ATP5B	ARAP1
SNORD59B	P2RY2
SNORD59A	P2RY6
HSD17B6	UCP2
RDH16	P4HA3
ZBTB39	PGM2L1
TAC3	KCNE3
NAB2	LIPT2
STAC3	XRRA1
R3HDM2	GDPD5
GLI1	SERPINH1
KIF5A	LRRC32
LOC101927583	TSKU
AGAP2	PAK1
LOC100129940	RAB30-AS1
MDM1	ANKRD42
LOC100507250	TMEM126A
CPSF6	PICALM
YEATS4	EED
FRS2	ME3
LRRC10	PRSS23
BEST3	LOC100506368
LOC101928002	CHORDC1
RAB3IP	CCDC67
MYRFL	SMCO4
LGR5	HEPHL1
THAP2	PANX1
ZDHHC17	FUT4
LINC00936	AMOTL1
C12orf79	LOC101929295
CLLU1OS	PGR
MIR3685	ANGPTL5
LOC643770	CEP126
ACTR6	YAP1
MYBPC1	BIRC3
PAH	BIRC2
ASCL1	TMEM123
C12orf73	MMP20
CHST11	MMP8
RFX4	MMP10
RIC8B	WTAPP1
MTERF2	MMP1
CRY1	MMP3
WSCD2	MMP12
SVOP	MMP13
USP30	DCUN1D5
ALKBH2	DYNC2H1
ACACB	PDGFD
FOXN4	LOC643733
FAM222A	CASP4
C12orf76	CASP5
IFT81	CASP1
ATP2A2	SLC35F2
ACAD10	CUL5
MAPKAPK5-AS1	KDELC2
MAPKAPK5	EXPH5
ADAM1A	DDX10
TMEM116	C11orf87
HECTD4	ZC3H12C
RPH3A	RDX
DTX1	FDX1
RASAL1	BTG4
LINC00173	LAYN
RNFT2	SIK2
HRK	PPP2R1B
FBXW8	HSPB2
FBXO21	DIXDC1
TAOK3	IL18
SRRM4	BCO2
PXN-AS1	PTS
CABP1	ZW10
SPPL3	NNMT
HNF1A	RBM7
P2RX7	REXO2
KDM2B	LINC00900
MIR548AQ	ZPR1
LINC01089	APOA5
BCL7A	APOA1
MLXIP	LOC100652768
LOC101593348	CEP164
KNTC1	MPZL3
HIP1R	MPZL2
RILPL1	ARCN1
LOC101927415	BCL9L
ATP6V0A2	DPAGT1
ZNF664	NLRX1
ZNF664-FAM101A	OAF
FAM101A	TBCEL
TMEM132C	BLID
GLT1D1	CLMP
SFSWAP	STT3A
DDX51	HYLS1
GALNT9	SRPR
FBRSL1	DCPS
POLE	ST3GAL4
PXMP2	KIRREL3
CHFR	LOC101929427
ZNF84	KIRREL3-AS3
ZNF891	FLI1
ZNF10	SENCR
TPTE2	C11orf45
PSPC1	TMEM45B
ZMYM2	ST14
CRYL1	ADAMTS8
IL17D	ADAMTS15
TNFRSF19	C11orf44
C1QTNF9B	LOC100507431
AMER2	SNX19
LINC00463	NTM
WASF3	LOC100049716
GPR12	LINC00942
GSX1	WNT5B
PAN3-AS1	ADIPOR2
UBL3	CACNA1C
B3GLCT	TSPAN9
FRY-AS1	CRACR2A
FRY	NTF3
ZAR1L	ANO2
N4BP2L1	VWF
N4BP2L2-IT2	PLEKHG6
NBEA	TNFRSF1A
LINC00437	SCNN1A
FREM2	LTBR
SLC25A15	TAPBPL
KBTBD6	MRPL51
LOC101929140	P3H3
KBTBD7	EMG1
NAA16	C1S
RGCC	C1R
VWA8-AS1	C1RL
TPT1-AS1	C1RL-AS1
CPB2-AS1	SLC2A14
KIAA0226L	FAM90A1
LINC00441	AICDA
CAB39L	MFAP5
MIR3613	M6PR
DLEU7-AS1	CLEC1A
LINC00371	CLEC7A
LINC00282	GABARAPL1
MRPS31P5	KLRD1
KLF12	STYK1
LINC00381	YBX3
LINC00347	SMIM10L1
EDNRB	ETV6
RNF219-AS1	CREBL2
POU4F1	DDX47
RBM26-AS1	MIR614
LINC01080	HTR7P1
LINC00377	GSG1
SLITRK1	EMP1
DCT	PLBD1
LOC101927248	HIST4H4
SOX21	H2AFJ
RAP2A	MGP
FARP1	ARHGDIB
CLYBL	LINC01489
PCCA	RERG
FGF14-IT1	EPS8
ARGLU1	STRAP
LINC00551	MGST1
LINC00443	PLEKHA5
MYO16	AEBP2
ANKRD10	PDE3A
ARHGEF7-AS2	RECQL
ARHGEF7	GOLT1B
TEX29	SPX
LINC00354	LMNTD1
LINC00403	RASSF8
SOX1	BHLHE41
ATP11A	SSPN
MCF2L-AS1	ASUN
MCF2L	STK38L
F7	ARNTL2
DCUN1D2	SMCO2
MIR548AR	PPFIBP1
CCNB1IP1	REP15
RNASE6	PTHLH
RNASE1	CCDC91
NDRG2	ERGIC2
MIR6717	LINC00941
TPPP2	FLJ13224
ZNF219	DENND5B-AS1
TMEM253	YARS2
LINC00641	PKP2
SALL2	GXYLT1
REM2	PRICKLE1
C14orf93	PLEKHA8P1
CDH24	ANO6
PPP1R3E	SLC38A2
SLC22A17	LOC100288798
CMTM5	AMIGO2
MYH6	PCED1B
MYH7	HDAC7
NGDN	VDR
JPH4	FKBP11
LRRC16B	TUBA1C
CPNE6	AQP5
NRL	ATF1
FITM1	SMAGP
NYNRIN	BIN2
SDR39U1	CELA1
NOVA1	GALNT6
LOC102724890	ACVRL1
LINC00645	KRT80
NPAS3	LINC00592
INSM2	KRT7
RALGAPA1	KRT81
BRMS1L	KRT86
LINC00609	KRT4
PNN	KRT79
KLHL28	KRT78
MDGA2	KRT8
KLHDC1	KRT18
ATP5S	SPRYD3
TRIM9	IGFBP6
TXNDC16	SOAT2
GPR137C	ITGB7
DDHD1	RARG
OTX2	PRR13
ARID4A	LOC100240735
DAAM1	NFE2
CCDC175	GPR84
RTN1	ITGA5
SIX6	TESPA1
TRMT5	RDH5
SPTB	ORMDL2
GPHN	MMP19
PLEKHH1	ESYT1
SMOC1	MYL6
LOC145474	IL23A
SIPA1L1	STAT2
RGS6	SPRYD4
MIR7843	RBMS2
ACOT6	STAT6
DNAL1	MIR616
ALDH6A1	OS9
LIN52	AGAP2-AS1
RPS6KL1	TSPAN31
JDP2	CYP27B1
GPATCH2L	METTL1
VASH1	METTL21B
LOC100506603	LOC101927653
ZDHHC22	LRIG3
NGB	USP15
POMT2	LINC01465
C14orf178	PPM1H
LOC100506700	AVPR1A
CALM1	C12orf56
TTC7B	RASSF3
SLC24A4	GNS
CHGA	WIF1
MOAP1	MSRB3
TMEM251	LOC100507065
UNC79	RPSAP52
COX8C	HMGA2
PRIMA1	LLPH
FAM181A-AS1	IRAK3
FAM181A	LOC100507195
DICER1-AS1	RAP1B
LOC730202	PTPRB
LINC00618	PTPRR
EVL	TSPAN8
CKB	TRHDE-AS1
TMEM179	TRHDE
MTA1	GLIPR1L1
C14orf80	GLIPR1
TMEM121	KRR1
MIR1268A	PHLDA1
HERC2P7	CSRP2
GOLGA8S	NAV3
MKRN3	PAWR
MAGEL2	PPP1R12A
GABRB3	PTPRQ
HERC2P9	PPFIA2
PDCD6IPP2	CCDC59
APBA2	METTL25
TJP1	LRRIQ1
OTUD7A	RASSF9
CHRNA7	TMTC3
LOC101928134	KITLG
RYR3	GALNT4
PGBD4	EPYC
SLC12A6	PLEKHG7
RASGRP1	LOC643339
DISP2	LOC102724933
BAHD1	FGD6
MRPL42P5	PGAM1P5
RAD51-AS1	NTN4
LTK	SNRPF
TYRO3	LTA4H
JMJD7	ELK3
PLA2G4B	LOC643711
GANC	SLC9A7P1
LRRC57	IKBIP
STARD9	ANO4
TTBK2	SLC5A8
ZSCAN29	ARL1
TUBGCP4	CHPT1
CKMT1B	DRAM1
CKMT1A	CCDC53
SERINC4	NUP37
LOC100419583	PMCH
TRIM69	NT5DC3
SHF	HSP90B1
SEMA6D	GLT8D2
MYEF2	TXNRD1
CTXN2	ALDH1L2
SECISBP2L	KIAA1033
FLJ10038	KCCAT198
GABPB1-AS1	C12orf75
MIR4712	CASC18
DMXL2	NUAK1
SCG3	CKAP4
LYSMD2	TMEM263
TMOD2	BTBD11
BCL2L10	PRDM4
LOC100129973	CMKLR1
PYGO1	SELPLG
PRTG	CORO1C
RFX7	USP30-AS1
LINC00926	KCTD10
ALDH1A2	MVK
FOXB1	FAM222A-AS1
RORA	TRPV4
VPS13C	ANKRD13A
C2CD4A	ARPC3
LOC102723344	VPS29
USP3	CCDC63
SNX22	MYL2
ANKDD1A	LINC01405
IGDCC3	SH2B3
IQCH-AS1	OAS1
C15orf61	OAS2
MAP2K5	PLBD2
SKOR1	SDSL
CALML4	LHX5
FEM1B	TBX3
CORO2B	HSPB8
ANP32A	CCDC60
MIR4312	PXN
ANP32A-IT1	RNF10
EWSAT1	OASL
CELF6	RHOF
HEXA-AS1	HPD
NPTN-IT1	PSMD9
C15orf59	CLIP1
C15orf59-AS1	DENR
LMAN1L	RILPL2
CPLX3	TMED2
ULK3	NCOR2
FAM219B	LINC00944
SCAMP5	SLC15A4
CSPG4	MMP17
SCAPER	GOLGA3
TSPAN3	ZMYM5
PEAK1	GJB2
LINC00597	GJB6
LINGO1	N6AMT2
LINGO1-AS1	LATS2
ACSBG1	ZDHHC20
LINC01314	MICU2
ARNT2	PARP4
ABHD17C	TPTE2P6
C15orf26	MTMR6
CPEB1-AS1	ATP8A2
AP3B2	RNF6
LOC338963	USP12
ACTG1P17	USP12-AS2
SCARNA15	RASL11A
EFTUD1P1	ATP5EP2
LOC101929679	FLT1
KLHL25	POMP
MIR1276	SLC46A3
ACAN	MTUS2
RLBP1	LINC00365
FANCI	ALOX5AP
LINC00925	LINC00398
PLIN1	MEDAG
IDH2	HSPH1
TTLL13P	STARD13
CRTC3-AS1	SPG20
MAN2A2	CCNA1
LOC101926911	SERTM1
LINC01578	LINC01048
LOC440311	LINC00571
LINC00924	UFM1
PCSK6	LHFP
TM2D3	COG6
SNRNP25	LINC01050
HBZ	EPSTI1
LUC7L	DNAJC15
RGS11	CCDC122
ARHGDIG	LACC1
PDIA2	SERP2
AXIN1	GTF2F2
LOC100134368	KCTD4
NME4	SLC25A30
RAB11FIP3	COG3
RAB40C	SPERT
WFIKKN1	SIAH3
FAM195A	LCP1
FBXL16	LINC00563
FAM173A	HTR2A
CCDC78	NUDT15
HAGHL	MED4
NARFL	ITM2B
PRR25	RCBTB2
LMF1	CYSLTR2
SOX8	FNDC3A
SSTR5	SETDB2
C1QTNF8	PHF11
CACNA1H	SPRYD7
BAIAP3	CCDC70
IFT140	ALG11
CRAMP1L	NEK5
MAPK8IP3	SUGT1
IGFALS	LECT1
NOXO1	DIAPH3
SYNGR3	MZT1
CASKIN1	KLF5
MLST8	CTAGE11P
BRICD5	TBC1D4
ECI1	UCHL3
ABCA3	LMO7-AS1
ABCA17P	LMO7
TBC1D24	LMO7DN-IT1
PRSS27	CLN5
PAQR4	FBXL3
LOC101929613	MYCBP2
ZSCAN10	SCEL
ZNF200	SLITRK6
TIGD7	LINC01040
ZSCAN32	GPC6-AS1
ZNF174	TGDS
NAA60	GPR180
NLRC3	ABCC4
TRAP1	DNAJC3
SRL	HS6ST3
LINC01569	MBNL2
TFAP4	STK24
CORO7	DOCK9
C16orf96	UBAC2-AS1
NAGPA-AS1	GPR183
ABAT	TM9SF2
SNN	NALCN-AS1
C16orf45	ITGBL1
XYLT1	KDELC1
COQ7	LINC00460
SYT17	EFNB2
KNOP1	FAM155A-IT1
GPRC5B	COL4A2
GPR139	RAB20
LOC81691	CARS2
METTL9	LINC00346
EEF2K	F10
SCNN1G	CUL4A
SCNN1B	LAMP1
COG7	LOC101928841
PRKCB	ADPRHL1
LOC554206	TMCO3
LCMT1-AS1	LINC00552
ZKSCAN2	TMEM255B
IL21R-AS1	GAS6
GSG1L	GAS6-AS2
SBK1	LINC00452
NPIPB6	LINC00565
CCDC101	SLC39A2
ATP2A1	RNASE7
MIR4517	RPGRIP1
MAZ	SLC7A7
PRRT2	LRP10
CDIPT-AS1	AJUBA
KCTD13	C14orf119
DOC2A	PSME1
FAM57B	PSME2
TBX6	IRF9
YPEL3	IPO4
ZNF48	TM9SF1
ITGAL	DHRS1
ZNF768	ADCY4
ZNF764	CBLN3
ZNF785	LINC01551
ZNF689	SCFD1
PRR14	STRN3
LOC730183	CFL2
ZNF629	SRP54
MIR762HG	PSMA6
STX1B	NFKBIA
KAT8	CLEC14A
PRSS8	LINC00639
ZNF843	SEC23A
GPT2	MIA2
ABCC11	LRFN5
SIAH1	RPL36AL
CBLN1	MGAT2
BRD7	ARF6
NKD1	LINC01588
LOC101927272	LINC01599
MIR548AI	SAV1
SALL1	FRMD6
IRX6	FRMD6-AS1
SLC6A2	PTGER2
LOC283856	ERO1A
GNAO1	STYX
DKFZP434H168	GNPNAT1
BBS2	CDKN3
MT3	GCH1
MT1G	KTN1-AS1
CPNE2	KTN1
FAM192A	LINC00520
PLLP	C14orf105
CIAPIN1	ACTR10
COQ9	PSMA3
ADGRG1	DACT1
ADGRG3	SIX4
NDRG4	MNAT1
SNORA76A	TMEM30B
BEAN1	PRKCH
BEAN1-AS1	LOC101927780
CMTM2	FLJ22447
CES3	HIF1A
HSF4	SNAPC1
KIAA0895L	RHOJ
HSD11B2	ESR2
GFOD2	HSPA2
TSNAXIP1	PPP1R36
CENPT	FNTB
NRN1L	LOC100128233
PRMT7	FUT8
SMPD3	FUT8-AS1
TANGO6	ATP6V1D
TERF2	ACTN1
PDPR	ACTN1-AS1
SMG1P7	SUSD6
MTSS1L	MAP3K9
HYDIN	PAPLN
ZNF19	NUMB
TAT-AS1	C14orf169
MARVELD3	ACOT4
ZNF821	NPC2
DHODH	LTBP2
PMFBP1	FCF1
LINC01572	PGF
LOC283922	ZC2HC1C
FA2H	NEK9
ZFP1	C14orf1
TMEM170A	TGFB3
CHST5	SLIRP
TMEM231	SNW1
GABARAPL2	DIO2
MIR4720	SEL1L
HSBP1	FLRT2
MLYCD	GPR65
NECAB2	FOXN3-AS1
SLC38A8	KCNK13
HSDL1	PSMC1
ATP2C2	GPR68
GINS2	TRIP11
JPH3	GOLGA5
CBFA2T3	ASB2
LINC00304	LINC00521
CDH15	IFI27
SPATA2L	IFI27L2
ZNF276	PPP4R4
SPIRE2	SERPINA5
DEF8	LINC00341
RPH3AL	SYNE3
TUSC5	GLRX5
RTN4RL1	BDKRB2
SRR	BDKRB1
SPATA22	SETD3
ARRB2	CCNK
ENO3	CCDC85C
LOC102724009	HHIPL1
ZNF232	EML1
RPAIN	YY1
LOC728392	WARS
WSCD1	LINC00239
C17orf100	DYNC1H1
MIR4520-2	TRAF3
ALOX15P1	AMN
TEKT1	EXOC3L4
MIR497HG	TNFAIP2
ASGR1	LINC00605
DLG4	EIF5
SLC2A4	INF2
YBX2	AHNAK2
NLGN2	CDCA4
FGF11	CRIP1
SAT2	OCA2
ATP1B2	SCG5
EFNB3	AVEN
KDM6B	ACTC1
LOC284023	C15orf41
KCNAB3	LOC145845
HES7	MEIS2
VAMP2	C15orf54
LINC00324	THBS1
CTC1	GPR176
LOC100128288	EIF2AK4
KRBA2	SRP14
LOC101928266	C15orf56
CFAP52	ANKRD63
USP43	PLCB2
MYH3	C15orf52
PIRT	GCHFR
SHISA6	C15orf62
ZNF18	ZFYVE19
TBC1D26	SPINT1
ZSWIM7	RHOV
LRRC75A	EHD4
ZNF287	SNAP23
ZNF624	CCNDBP1
NT5M	TGM5
MED9	PDIA3
TBC1D28	B2M
ZNF286B	FBN1
FOXO3B	COPS2
SNORD3A	FGF7
EPN2	DTWD1
EPN2-AS1	ATP8B4
SLC47A2	SPPL2A
CCDC144CP	AP4E1
FAM106B	TNFAIP8L3
MTRNR2L1	TMOD3
WSB1	UNC13C
KSR1	RAB27A
NOS2	PIGB
LYRM9	CCPG1
NLK	NEDD4
KRT18P55	LOC145783
TMEM199	CGNL1
SARM1	RNF111
UNC119	MYO1E
SGK494	MIR2116
PROCA1	GCNT3
SNORD42B	GTF2A2
SNORD4A	BNIP2
SNORD4B	ANXA2
TRAF4	TLN2
FAM222B	TPM1
FLOT2	LACTB
DHRS13	DAPK2
ANKRD13B	PPIB
LRRC37BP1	RASL12
SUZ12P1	RAB11A
OMG	ZWILCH
LRRC37B	LCTL
SH3GL1P1	SMAD6
RHOT1	SMAD3
RHBDL3	AAGAB
CDK5R1	ITGA11
CCT6B	NOX5
RASL10B	SPESP1
GAS2L2	PAQR5
TADA2A	UACA
GPR179	LARP6
SOCS7	GRAMD2
SRCIN1	PKM
C17orf96	HEXA
MLLT6	ADPGK
PIP4K2B	ADPGK-AS1
LOC100131347	NPTN
CACNB1	LOXL1-AS1
STAC2	LOXL1
FBXL20	PML
NEUROD2	LOC283731
TCAP	ISLR2
PGAP3	ISLR
LRRC3C	STRA6
THRA	CCDC33
MSL1	CYP11A1
CASC3	LOC729739
KRT20	SNUPN
HAP1	TBC1D2B
NT5C3B	DNAJA4
KLHL11	CRABP1
TTC25	HYKK
KAT2A	PSMA4
KCNH4	ADAMTS7
STAT5B	MORF4L1
ATP6V0A1	CTSH
MIR5010	RASGRF1
PLEKHH3	TMED3
CCR10	KIAA1024
EZH1	MTHFS
RAMP2-AS1	ST20-AS1
RAMP2	FAH
CNTD1	MESDC2
RND2	MESDC1
LOC101929767	STARD5
LINC00854	TMC3-AS1
MPP2	RPS17
HDAC5	WHAMM
ASB16	HOMER2
RUNDC3A-AS1	FAM103A1
RUNDC3A	TM6SF1
FAM171A2	BNC1
ITGA2B	LINC00933
ADAM11	SEC11A
HEXIM2	ALPK3
MGC57346	PDE8A
CRHR1-IT1	LINC00052
CRHR1	MESP2
MAPT-AS1	ANPEP
SPPL2C	CIB1
MAPT	GABARAPL3
MAPT-IT1	ZNF774
STH	IQGAP1
KANSL1	FURIN
WNT3	FES
WNT9B	RCCD1
RPRML	SLCO3A1
THCAT158	ST8SIA2
TBKBP1	C15orf32
TBX21	FAM174B
SP6	LINC01581
ZNF652	MCTP2
LOC102724596	ALDH1A3
NXPH3	CHSY1
KAT7	VIMP
FLJ45513	MSLN
SAMD14	TPSG1
HILS1	TMEM204
CHAD	HN1L
RSAD1	SLC9A3R2
CACNA1G	LOC652276
LUC7L3	ZG16B
TOB1-AS1	PRSS22
MBTD1	FLYWCH2
CA10	TNFRSF12A
HLF	HCFC1R1
ANKFN1	CCDC64B
MSI2	MMP25
LOC101927666	IL32
BZRAP1	LOC102724927
BZRAP1-AS1	VASN
SEPT4	HMOX2
TEX14	PPL
PPM1E	NAGPA
TRIM37	ALG1
MIR454	PMM2
GDPD1	C16orf72
PPM1D	TVP23A
KCNH6	SOCS1
DCAF7	CPPED1
STRADA	SHISA9
AMZ2P1	PARN
AXIN2	BFAR
C17orf58	PDXDC1
LOC440461	NTAN1
ABCA8	MYH11
KCNJ16	FOPNL
CASC17	ABCC1
SOX9-AS1	ITPRIPL2
LOC101928205	CLEC19A
SOX9	THUMPD1
LINC00673	ACSM3
SDK2	DCUN1D3
TTYH2	SLC7A5P2
DNAI2	PDZD9
KIF19	C16orf52
BTBD17	CDR2
USH1G	RRN3P3
MIF4GD	UBFD1
KIAA0195	ARHGAP17
UNK	IL4R
TEN1-CDK3	IL21R
FOXJ1	LAT
RNF157-AS1	SNX29P2
RNF157	NPIPB11
UBALD2	SLC7A5P1
SEC14L1	C16orf54
SNHG20	MVP
TNRC6C	CTF1
CBX2	ORAI3
CBX8	STX4
CBX4	VKORC1
LOC101928766	BCKDK
TBC1D16	PYCARD
CCDC40	ITGAM
SLC26A11	ITGAX
LOC100294362	TGFB1I1
MIR4730	ZNF267
AATK	ANKRD26P1
MIR1250	SHCBP1
AATK-AS1	ZNF423
LOC100130370	ADCY7
FAM195B	CYLD
RAC3	FTO-IT1
TEX19	IRX3
TYMSOS	MMP2
TYMS	LPCAT2
YES1	OGFOD1
CBX3P2	MT2A
EMILIN2	MT1L
LPIN2	MT1E
MYOM1	MT1A
TGIF1	SLC12A3
DLGAP1	HERPUD1
DLGAP1-AS3	NLRC5
LINC00526	USB1
ZBTB14	CDH11
ANKRD12	LINC00922
LINC01254	RRAD
MPPE1	CES4A
SLMO1	C16orf70
SPIRE1	TRADD
CEP192	FHOD1
RNMT	PLEKHG4
MC5R	NUTF2
ZNF519	PSMB10
GREB1L	PLA2G15
ABHD3	CDH3
MIB1	HAS3
LOC729950	CIRH1A
ZNF521	SNTB2
AQP4	PDF
AQP4-AS1	NIP7
CHST9	CYB5B
NOL4	NFAT5
DTNA	NQO1
ZNF397	EXOSC6
ZNF24	ST3GAL2
RPRD1A	IL34
SLC39A6	CALB2
CELF4	CHST4
RIT2	HP
SYT4	TXNL4B
ATP5A1	ZFHX3
RNF165	C16orf47
LOXHD1	PSMD7
PIAS2	MLKL
KATNAL2	BCAR1
HDHD2	SYCE1L
SNHG22	VAT1L
SCARNA17	LOC102724084
CXXC1	CDYL2
MRO	PKD1L2
POLI	BCO1
TCF4	PLCG2
LINC01416	SDR42E1
ST8SIA3	HSD17B2
ONECUT2	MBTPS1
OACYLP	KCNG4
SEC11C	TLDC1
CDH20	COTL1
ZCCHC2	KLHL36
PHLPP1	ZDHHC7
BCL2	FAM92B
CDH7	LOC400548
DSEL	LINC00311
CCDC102B	FENDRR
FAM69C	FOXC2
CNDP1	FOXL1
LINC00909	SLC7A5
ZADH2	LOC101928880
GALR1	CYBA
SALL3	SNAI3
ATP9B	PIEZO1
KCNG2	LOC100287036
RBFA	VPS9D1-AS1
RBFADN	MYO1C
ADNP2	RILP
PARD6G-AS1	TLCD2
C2CD4C	MIR22HG
SHC2	HIC1
PALM	TSR1
LPPR3	LOC101927911
AZU1	TRPV3
R3HDM4	EMC6
KISS1R	C17orf107
WDR18	GP1BA
CBARP	PFN1
ATP5D	KIF1C
MIDN	DERL2
CIRBP	NLRP1
EFNA2	AIPL1
MUM1	XAF1
NDUFS7	SLC16A13
APC2	SLC16A11
PCSK4	CLDN7
PLK5	EIF5A
TCF3	ACAP1
ABHD17A	KCTD11
BTBD2	TNK1
DOT1L	TMEM102
PLEKHJ1	CHRNB1
LINGO3	CD68
LSM7	CYB5D1
SPPL2B	TRAPPC1
TMPRSS9	C17orf59
GNG7	NDEL1
DIRAS1	PIK3R6
ZNF554	SCO1
ZNF555	TMEM220
ZNF57	MAGOH2P
ZNF77	MYOCD
TLE6	PMP22
TLE2	MIR4731
AES	TVP23C
CELF5	TRIM16
ZFR2	MEIS3P1
ATCAY	ADORA2B
SHD	UBB
TMIGD2	TRPV2
FSD1	MPRIP
MPND	COPS3
PLIN5	RASD1
MIR7-3HG	TOM1L2
KDM4B	LRRC48
PTPRS	ALKBH5
HSD11B1L	FLII
NRTN	SMCR8
FUT3	SHMT1
LOC100128568	TRIM16L
RFX2	TVP23B
CLPP	SLC5A10
ALKBH7	FAM83G
PSPN	MAP2K3
KHSRP	KCNJ12
SLC25A23	LGALS9
TUBB4A	RAB34
ZNF557	CRYBA1
INSR	CPD
LOC100128573	RNF135
C19orf45	DPRXP4
ZNF358	EVI2B
CAMSAP3	UTP6
PRR36	PSMD11
CTXN1	MYO1D
TIMM44	ASIC2
ELAVL1	CCL2
CCL25	CCL7
FBN3	CCL11
NDUFA7	CCL8
KANK3	CCL1
RAB11B	C17orf102
PRAM1	TMEM132E
ZNF414	RFFL
ZNF558	FNDC8
ZNF317	SLFN5
OR7D2	SLFN12
ZNF559	SLFN13
ZNF559-ZNF177	SLFN12L
ZNF266	CCL5
ZNF121	MYO19
ZNF562	HNF1B
ZNF846	ARHGAP23
PPAN	LASP1
ZGLP1	CDK12
PDE4A	GRB7
S1PR5	IKZF3
ATG4D	CSF3
KRI1	GJD3
ILF3-AS1	KRT39
ILF3	KRTAP2-3
SMARCA4	KRT32
DOCK6	KRT13
C19orf80	KRT15
CCDC159	KRT19
CCDC151	KRT9
ELAVL3	KRT14
ZNF653	KRT16
ECSIT	KRT17
ZNF627	JUP
ZNF833P	DNAJC7
ZNF441	STAT5A
ZNF491	PTRF
ZNF440	IFI35
ZNF439	TMEM106A
ZNF700	MEOX1
ZNF763	DUSP3
ZNF433	NAGS
ZNF878	GRN
ZNF844	NMT1
ZNF625-ZNF20	FMNL1
ZNF625	MAP3K14
ZNF136	ARHGAP27
LOC100289333	PLEKHM1
ZNF442	NSF
ZNF799	GOSR2
ZNF443	CDC27
ZNF709	ITGB3
ZNF564	KPNB1
ZNF490	COPZ2
WDR83	NFE2L1
DHPS	SKAP1
TNPO2	THRA1/BTR
ASNA1	LOC101927166
HOOK2	HOXB2
PRDX2	HOXB3
RTBDN	HOXB4
MAST1	HOXB-AS3
KLF1	HOXB5
SYCE2	HOXB6
CCDC130	HOXB8
NANOS3	HOXB9
C19orf57	MIR196A1
CC2D1A	PRAC2
DCAF15	CALCOCO2
IL27RA	UBE2Z
PALM3	SNF8
LOC113230	GIP
SAMD1	IGF2BP1
ADGRL1	LOC284080
DDX39A	ITGA3
ZNF333	COL1A1
ADGRE2	LOC101927230
SLC1A6	TMEM92
ILVBL	TMEM92-AS1
NOTCH3	LRRC59
AKAP8L	EPN3
CYP4F12	SPATA20
CYP4F24P	ABCC3
CHERP	WFIKKN2
TMEM38A	TOM1L1
HAUS8	PCTP
MYO9B	NOG
USHBP1	TRIM25
ANO8	SCPEP1
UNC13A	RNF43
FCHO1	CLTC
RPL18A	PTRH2
KCNN1	VMP1
MAST3	WFDC21P
PIK3R2	CA4
RAB3A	C17orf82
JUND	TLK2
PGPEP1	MRC2
SSBP4	MARCH10
TMEM59L	CYB561
CRTC1	ACE
CERS1	MAP3K3
DDX49	FTSJ3
SUGP2	PSMC5
RFXANK	SMARCD2
NR2C2AP	ICAM2
NCAN	TEX2
HAPLN4	PECAM1
TM6SF2	MILR1
TSSK6	SMURF2
PBX4	LOC100507002
GMIP	RGS9
ZNF101	PSMD12
ZNF14	NOL11
LINC00663	SLC16A6
ZNF253	PRKAR1A
ZNF682	WIPI1
ZNF737	MIR635
ZNF85	FAM20A
ZNF431	ABCA9
ZNF708	ABCA6
ZNF738	LINC01483
ZNF493	SSTR2
ZNF429	COG1
ZNF100	SLC9A3R1
ZNF43	CDR2L
ZNF724P	SLC16A5
IPO5P1	ITGB4
ZNF91	SRP68
ZNF675	GALR2
ZNF254	SPHK1
UQCRFS1	RHBDF2
VSTM2B	CYGB
DPY19L3	ST6GALNAC2
RGS9BP	ST6GALNAC1
LRP3	MXRA7
CEBPA	MGAT5B
CEBPA-AS1	LOC100507351
CEBPG	TNRC6C-AS1
CHST8	SYNGR2
KCTD15	TK1
KIAA0355	SOCS3
PDCD2L	LOC101928674
UBA2	PGS1
SCGB1B2P	USP36
SCGB2B2	LGALS3BP
ZNF302	CANT1
ZNF181	C1QTNF1
ZNF599	RBFOX3
ZNF30-AS1	RNF213
ZNF30	CHMP6
ZNF792	C17orf89
GRAMD1A	SLC38A10
FXYD7	ACTG1
USF2	FSCN2
TMEM147-AS1	NPLOC4
TMEM147	TSPAN10
HAUS5	PDE6G
ETV2	CCDC137
COX6B1	HGS
KMT2B	SLC25A10
IGFLR1	P4HB
U2AF1L4	ARHGDIA
ARHGAP33	DUS1L
SDHAF1	SLC16A3
CLIP3	OGFOD3
WDR62	RAB40B
POLR2I	USP14
ZNF565	COLEC12
LINC00665	CLUL1
ZFP14	MYL12A
ZNF566	MYL12B
LOC728752	DLGAP1-AS2
ZNF260	TMEM200C
ZNF529	ARHGAP28
ZNF382	GACAT2
ZNF461	MTCL1
LINC01534	TWSG1
ZNF567	RALBP1
ZNF850	PIEZO2
LOC728485	CIDEA
ZNF790	TUBB6
ZNF345	PTPN2
ZNF568	ANKRD20A5P
ZNF420	ANKRD30B
ZNF585A	LINC01444
ZNF585B	GATA6-AS1
ZNF383	GATA6
HKR1	CABLES1
ZNF527	RIOK3
ZNF570	NPC1
ZNF571-AS1	ANKRD29
ZNF540	LAMA3
ZNF571	CABYR
ZFP30	DSC2
ZNF781	DSC1
ZNF607	DSG3
ZNF573	CCDC178
DPF1	INO80C
CATSPERG	MOCOS
FAM98C	TPGS2
RYR1	SLC14A1
MAP4K1	SIGLEC15
SIRT2	PSTPIP2
CCER2	SMAD7
SARS2	RPL17
LRFN1	LIPG
TIMM50	LOC100287225
DLL3	MBD2
SELV	RAB27B
EID2B	CCDC68
EID2	LOC101927229
ZNF780B	FECH
ZNF780A	ATP8B1
MAP3K10	ALPK2
TTC9B	LOC101927322
CNTD2	MALT1
AKT2	LMAN1
MIR641	PMAIP1
ADCK4	MC4R
C19orf54	RNF152
SNRPA	VPS4B
CCDC97	SERPINB7
TMEM91	SERPINB8
BCKDHA	LOC101060542
ATP5SL	LOC100505817
ATP1A3	LINC00683
GSK3A	MBP
ERF	HSBP1L1
PAFAH1B3	FSTL3
TMEM145	MISP
LIPE-AS1	CNN2
IRGQ	SBNO2
ZNF428	CIRBP-AS1
CADM4	DAZAP1
LYPD5	ADAMTSL5
ZNF45	ATP8B3
ZNF221	MKNK2
ZNF155	GADD45B
LOC101928063	GNA15
ZNF230	LOC100996351
ZNF222	MFSD12
ZNF223	ZBTB7A
ZNF284	EBI3
ZNF224	STAP2
ZNF225	LRG1
ZNF234	MYDGF
ZNF226	DPP9
ZNF227	PLIN3
ZNF235	TNFSF9
ZNF112	CD70
ZNF285	TNFSF14
ZNF180	C3
APOE	SH2D3A
ZNF296	ADGRE1
NKPD1	STXBP2
TRAPPC6A	LRRC8E
MARK4	MUC16
RTN2	COL5A3
GIPR	ICAM1
FBXO46	ICAM4
IRF2BP1	ICAM3
MYPOP	AP1M2
NANOS2	LDLR
NOVA2	CNN1
CCDC61	BEST2
PPP5C	CALR
PNMAL1	LYL1
PPP5D1	IER2
PNMAL2	CACNA1A
CALM3	LOC284454
GNG8	MIR23A
DACT3	PODNL1
DACT3-AS1	PTGER1
STRN4	SYDE1
ARHGAP35	RASAL3
ZC3H4	TPM4
BBC3	KLF2
[truncated: 2,400 more rows]

## Sheet: Stemness Gene-signatures
Benporath_ES1	Benporath_ES2	Bhattacharya_hESC	Shats_iPSC	Shats_Consensus	Benporath_Nanog	Benporath_Sox2	Kim_Myc	Smith_Human Epithelial ASC	Palmer_SC	Miranda et al cancer stemness
AASS	AEN	ACTC1	SEMG1	TTK	AASDH	AASDH	AAAS	VSNL1	DNMT3B	DNMT3B
ABCE1	CDC25A	ARL5B	TDGF1	CEP55	ABCB7	ABCB7	AASDHPPT	AKR1B1	MCM6	PFAS
ACTA1	CHEK2	AURKB	PELI1	ASPM	ABCF2	ABCF2	ABCB8	NOTCH4	CDC25A	XRCC5
ACTC1	CLDN6	BRIX1	AMT	CDC20	ABHD11	ABHD11	ABCE1	TMEM237	PFAS	HAUS6
ACTN3	CYP26A1	CACHD1	SOX2	PBK	ABHD2	ABLIM1	ADH5	SAMD5	MCM4	TET1
ADAM23	DBNDD1	CALU	TERF1	BUB1	ACADM	ABTB2	ADHFE1	PKD2	XRCC5	IGF2BP1
ADD2	DNMT3A	CCNB1	PHC1	CENPA	ACAT2	ACIN1	ADPGK	NAP1L1	HAUS6	PLAA
AEN	DSCC1	CCNC	FKBP1B	NEK2	ACO2	ACO2	ADSL	PTTG1	TET1	TEX10
AKIRIN1	DTYMK	CCT8	CYP26A1	TOP2A	ACOT8	ACOT8	AGPAT5	CDK6	IGF2BP1	MSH6
ALPL	EPHA1	CDK1	RNF44	TPX2	ACSL4	ACOX1	AHI1	CDCA7	PLAA	DLGAP5
AMD1	EPHX3	CRABP1	AP1M2	MAD2L1	ACTR1A	ACTR1A	AKT1S1	ACSL4	DEPDC1B	SKIV2L2
ANGEL2	ERCC6L	CRABP2	FGFR2	KIF11	ACTR1B	ADAR	ALAD	HELLS	TEX10	SOHLH2
AP1M2	ETV4	CYP26A1	FGFR2	BIRC5	ADAL	ADD3	AMD1	IKBIP	CCDC99	RRAS2
ARL5B	GDF3	DDX21	SMPDL3B	KIF4A	ADAR	AK3	AMH	PLTP	MSH2	PAICS
ATP1A2	GJC1	DNTTIP1	CNTNAP2	MELK	ADD3	AKIRIN1	ANAPC10	TMEM201	BUB1B	CPSF3
AURKB	GOLGA7	DSG2	SEPHS1	CCNB1	ADO	AKIRIN2	ANKRD10	CACHD1	MSH6	LIN28B
AUTS2	GPR19	DTL	POU5F1	UBE2C	AHSA1	AKT1S1	ANP32B	ILF3	DLGAP5	IPO5
AZIN1	HELLS	EIF4A1	ACAA2	PRC1	AK3	ALCAM	ARFRP1	DNMT1	SKIV2L2	BMPR1A
BCL2L12	HESX1	ELOVL6	PSIP1	BUB1B	AK4	ALDH7A1	ARMC8	USP31	CENPE	ZNF788
BIRC5	L1TD1	EPRS	GLDC	RRM2	AKIRIN1	ALPL	ARV1	FAM216A	CHEK2	ASCC3
BMPR1A	LIN28A	FABP5	MYCN	KIF20A	AKIRIN2	AMOTL1	ATAD2	SLC41A1	SOHLH2	FANCB
BOP1	LPAR4	FAM83D	HSD17B4	ECT2	ALCAM	ANKHD1	ATAD3A	PFKM	CCNB1	HMGA2
BRIX1	MCM10	GAL	DNMT3B	FOXM1	ALG9	ANKRD1	ATF4	KANK1	RRAS2	TRIM24
BRWD1	MYBL2	GDF3	CLN5	TRIP13	ALKBH1	ANO8	ATF7	SUPT16H	PRIM1	ORC1
BUB1	NANOG	GJA1	KIF5C	NUSAP1	ALKBH7	ANP32A	ATIC	ADCY3	PAICS	HDAC2
BUB1B	NCAPH	GNL3	SCNN1A	CKS2	AMIGO2	ANP32B	ATP5C1	FGD1	CCNA2	HESX1
BUB3	ORC1	GSX1	TUBB2B	ATAD2	AMOTL1	AP2A1	ATP5E	PTPN14	CPSF3	INHBE
C1QBP	ORC2	HDAC2	CDO1	CCNB2	ANGPT1	AP3B1	ATP5G2	C20orf27	NUSAP1	MIS18A
CACHD1	POU5F1	HMGA1	ATP6V1D	CDKN3	ANKMY2	APEX1	ATP6V1F	LGR6	LIN28B	DCUN1D5
CAMKV	PRDM14	HMGB2	UGT8	DTL	ANKRD1	APH1A	ATPIF1	SLC16A7	IPO5	MRPL3
CAPRIN2	PRKD3	HNRNPAB	TNNI3	DBF4	ANKRD49	APP	AURKB	JAM3	KIF11	CENPH
CASP3	PWP2	HSPA4	ARFGEF1	KIF2C	ANO8	AQP2	B3GNT7	FBL	BMPR1A	MYCN
CBS	RBM4	IDH1	NANOG	GPSM2	ANP32A	ARF3	BCLAF1	NASP	NDC80	HAUS1
CBX5	RRP9	IFITM1	CCNB1IP1	RAD51AP1	ANP32B	ARF4	BIRC2	RANBP1	BCAT1	GDF3
CCAR1	SLC5A6	IGF2BP2	POU5F1	CCNA2	ANXA1	ARFGEF1	BIVM	PRNP	CCNG1	TBCE
CCNA2	TDGF1	IMPDH2	RND2	RACGAP1	AP1G1	ARHGAP1	BLM	DSE	ZNF788	RIOK2
CCNB1	TXLNG	KIF4A	GPM6B	OIP5	AP1S2	ARHGAP11A	BRD8	GPX7	ASCC3	BCKDHB
CD24	VRTN	KPNA2	CNTNAP2	KIF15	AP2A1	ARID1B	BRE	KDELC1	FANCB	RAD1
CDC20	WSCD1	KRT18	CRABP1	CDC7	AP3B1	ARID4B	CACYBP	FCHSD2	MCM10	NREP
CDC25A	ZIC3	KRT8	MBD2	CENPF	APEX2	ARID5B	CANX	SLCO3A1	HMGA2	ADH5
CDC6		LDHB	PPP1R16B	SMC2	APH1A	ARIH1	CBX3	CCNB1IP1	SKP2	PLRG1
CDCA5		LEFTY1	RABGAP1L	PTTG1	APLP2	ARL4D	CBX5	NOL9	TRIM24	ROR1
CDK1		LIN28A	FGFR2	NCAPG	APOA2	ARMC6	CCND1	NKRF	ORC1	RAB3B
CDT1		LRRN1	GPM6B	KIF14	APOB	ARRDC3	CCNI	NUP107	HDAC2	DIAPH3
CEBPZ		MAD2L2	OVOL2	PAICS	APOM	ASNA1	CCT3	RCC2	HESX1	GNL2
CECR1		MGST1	CXADR	KIAA0101	APOPT1	ATAD2	CCT4	ARHGAP25	C1orf135	FGF2
CER1		MTHFD1	H3F3A	STMN1	AQP2	ATF3	CCT7	DDX46	INHBE	NMNAT2
CHAF1A		MTHFD2	GCH1	MSH2	ARF3	ATF4	CCT8	TCOF1	MIS18A	KIF20A
CHEK1		NANOG	FRAT2	RFC4	ARF4	ATP5F1	CDK4	GMPS	DCUN1D5	CENPI
CHEK2		NASP	HFE	FEN1	ARHGAP1	ATP6V1G1	CDT1		POLE2	DDX1
CHST7		NBR2	GPM6B	ZWINT	ARHGAP11A	AUH	CETN3		MRPL3	XXYLT1
CKMT1A		NME2	NUP210	SKP2	ARID1B	AVEN	CFL1		CENPH	GPR176
CLDN6		NPM1	PODXL	FBXO5	ARID5B	B3GALT4	CHCHD1		MYCN	BBS9
CNTNAP2		PITX2	TRIM24	CKS1B	ARIH1	B4GALT6	CLNS1A		HAUS1	C14orf166
COBL		PODXL	JARID2	PDSS1	ARMC6	BAMBI	CLPP		GDF3	BOD1
COCH		POU5F1	TERF1	SMC4	ARMCX1	BCAT1	CNIH4		TBCE	CDC123
CRABP1		PPAT	PPM1E	KIF23	ASAH1	BCKDHA	CNOT4		RIOK2	SNRPD3
CRABP2		PSIP1	AASS	HMGB2	ASB1	BCL9	COG4		BCKDHB	FAM118B
CRMP1		PSMA2	RNMT	HMMR	ASCC2	BCLAF1	COX5A		RAD1	DPH3
CSE1L		PSMA3	H3F3A	GTPBP4	ASXL1	BDH2	COX8A		NREP	EIF2B3
CTSC		PTTG1	SEPHS1	NCAPH	ATAD2	BMP2	CRAT		ADH5	RPF2
CXADR		RCC2	LCK	UCK2	ATF4	BMP7	CSDE1		PLRG1	APLP1
CYP26A1		RPL24	CRIM1	MCM4	ATG13	BTF3L4	CSNK2A1		ROR1	DACT1
CYP2S1		RPL4	BMPR1A	MCM6	ATG4C	BTG1	CSTF1		RAB3B	PDHB
DBNDD1		RPL6	POU5F1	RCC1	ATP11C	BUB1B	DARS		LOC285431	C14orf119
DCLK1		RPL7	TMEM5	RAD51	ATP5F1	BUB3	DBR1		DBC1	DTD1
DDX18		RPLP0	HEY2	MCAM	ATP6V1A	C12orf60	DBT		KIF23	SAMM50
DDX21		RPS24	PRNP	PUS7	ATP6V1G1	C14orf119	DDB1		DIAPH3	CCL26
DEK		RSL24D1	MAP7	MTIF2	ATPIF1	C14orf159	DDX17		GNL2	MED20
DHFR		SEMA6A	PPP1R16B	TALDO1	AURKA	C19orf43	DDX31		FGF2	UTP6
DIAPH2		SEPHS1	DAPK1	SNRPA1	AVL9	C19orf54	DDX5		TARDBP	RARS2
DIDO1		SERPINH1	RAB25	ESPL1	AXIN2	C1orf174	DDX54		NMNAT2	ARMCX2
DLG3		SET	LEFTY2	TTC13	B2M	C1orf21	DERL2		ZNF167	RARS
DLGAP5		SFRP2	PIPOX	ISG20L2	B3GALT4	C1orf54	DHX9		KIF20A	MTHFD2
DMKN		SLC16A1	ALDH3B1	SPTAN1	B4GALT6	C20orf194	DLST		CENPI	DHX15
DNA2		SMS	DCP2	CIRBP	BAG5	C20orf96	DNAJB4		DDX1	HTR7
DNAJB6		SNRPF	CRKL	LAMB2	BAG6	CA2	DNAJC8		XXYLT1	MTHFD1L
DNMT3A		SRSF7	LPP	IL6ST	BAMBI	CA4	DPH3		GPR176	ARMC9
DNMT3B		SSB	H3F3A	CST3	BCAT1	CABLES1	DTL		FBXO22	XPOT
DPPA4		TDGF1	MSH6	IGFBP4	BCKDHA	CACHD1	EBNA1BP2		BBS9	IARS
DSCC1		TK1	ARFGEF1		BCL9	CACNA1A	EEF1A1		C14orf166	HDX
DSG2		TNNT1	SOX2		BCL9L	CACNA2D1	EEF1B2		BOD1	ACTRT3
ECT2		TPX2	COBL		BCLAF1	CALM2	EEF2		CDC123	ERCC2
EGLN3		TUBB	TXNRD1		BLCAP	CALR	EIF2S2		SNRPD3	TBC1D16
ELOVL6		TUBB6	SALL2		BMP2	CAPRIN1	EIF4A2		FAM118B	GARS
EPB41L4B		ZNF117	TRIM24		BMP7	CAPZA2	EIF5A		DPH3	KIF7
EPCAM		ZNF257			BNIP1	CASP9	ELK4		EIF2B3	UBE2K
EPHA1		ZNF43			BRK1	CBX3	ENO3		KDELC1	SLC25A3
EPRS					BSCL2	CBX5	EPRS		RPF2	ICMT
ERBB2					BUB1B	CBY1	ERH		APLP1	UGGT2
ERCC6L					BUB3	CCDC93	ESPL1		DACT1	ATP11C
ESF1					BZW2	CCDC94	EWSR1		PDHB	SLC24A1
ESRP1					C11orf1	CCND1	EXOSC1		C14orf119	EIF2AK4
ETV1					C12orf60	CDC14B	FCHSD2		DTD1	GPX8
ETV4					C16orf72	CDC42BPA	FN1		SAMM50	ALX1
EXOSC5					C19orf54	CDC45	FNBP4		CCL26	OSTC
EXOSC9					C1orf21	CDC7	FUBP1		C4orf52	TRPC4
FABP5					C1orf54	CDH2	G3BP1		CCDC90B	HAS2
FAM46B					C20orf194	CDH3	GARS		MED20	FZD2
FAM60A					C20orf96	CDK1	GDF9		UTP6	TRNT1
FAM64A					C21orf59	CDK12	GMFB		RARS2	MMADHC
FANCL					CA2	CDK14	GMPS		KIAA0020	SNX8
FEN1					CA4	CDK16	GNAS		ARMCX2	CDH6
FGF13					CABLES1	CDK17	GNPAT		RARS	HAT1
FGF2					CACHD1	CDK6	GTF2IRD2B		MTHFD2	SEC11A
FGFR1					CACNA1A	CDYL	GTF3C4		DHX15	DIMT1
FKBP5					CACNA2D1	CEP41	HDLBP		HTR7	TM2D2
FOXD3					CALB1	CEP89	HELLS		HIST1H4C	FST
FOXO1					CALD1	CEP95	HMGA1		MTHFD1L	GBE1
FRAT2					CALM2	CER1	HMMR		ARMC9
FUBP1					CALR	CETN3	HSD17B12		XPOT
FXR1					CAND1	CFL1	HSPA14		IARS
FZD5					CAPZA2	CISD1	HSPD1		HDX
FZD7					CARS2	CLIC4	HSPE1		ACTRT3
G3BP1					CASP9	CLN3	IARS		ERCC2
G3BP2					CAV1	CLP1	IFRD1		TBC1D16
GABRA5					CBX3	CNOT8	IKBKAP		GARS
GABRB3					CBX5	COL12A1	ILF3		KIF7
GAD1					CCDC12	COMMD3	IMP4		UBE2K
GAL					CCDC93	COMMD7	INCENP		SLC25A3
GART					CCDC94	COPB1	IPMK		ICMT
GDF3					CCT6B	COPS7A	IPO7		UGGT2
GINS2					CCT7	CPT1A	JMJD6		ATP11C
GINS4					CDC123	CREB3L4	JUNB		SLC24A1
GJA1					CDC14B	CRIM1	KBTBD3		EIF2AK4
GLDC					CDC16	CSNK1E	KCNK5		GPX8
GMNN					CDC42EP4	CTGF	KCTD9		ALX1
GNL3					CDC45	CTH	KDELC1		OSTC
GNPTAB					CDC7	CXCL5	KIF20A		TRPC4
GPC4					CDH1	CYB5R2	KIFC1		HAS2
GPM6B					CDH2	CYR61	KIN		FZD2
GPR176					CDK1	DARS2	KLF16		TRNT1
GPR19					CDK14	DCAF11	LAPTM4A		MMADHC
GPRC5B					CDK16	DCAKD	LDHA		SNX8
HAS3					CDK17	DDA1	LMAN2		CDH6
HELLS					CDK6	DDX17	LMLN		HAT1
HESX1					CDS2	DDX21	LNPEP		SEC11A
HMGA1					CDYL	DDX39A	LRRC40		DIMT1
HMGB3					CEBPZ	DDX5	LRSAM1		TM2D2
HMMR					CELF2	DHDDS	LSM2		FST
HNRNPAB					CEP95	DHRS3	LUC7L		GBE1
HOMER1					CEPT1	DHX38	MAF1		NA
HPS3					CER1	DIAPH3	MAN1B1		MLL3
HSPA4					CETN3	DIDO1	MAP3K12		MXI1
HSPA8					CFL1	DKK1	MARS		FKSG49
HSPD1					CHCHD5	DNAJC16	MAT2B		FAM185BP
IDO1					CHD2	DNAJC2	MCM4		ARRB2
IFITM1					CHST4	DNM2	MCM5		SMARCC2
IGF2BP2					CISD1	DPAGT1	MCM6		WASH3P
IGF2BP3					CITED2	DPP3	MIS12		PILRB
ILF3					CKS2	DPPA4	MMAA		CTSH
ITPR3					CLDN6	DPYSL2	MMP14		SAT1
JARID2					CLIC1	DPYSL3	MRPL12		JUNB
KAT7					CLIC4	DSCC1	MRPL17		CD53
KCNS3					CLMP	DTNA	MRPL18		PECAM1
KIF2C					CLN3	DUSP12	MRPL36		IL10RA
KIF4A					CNBP	DUSP6	MRPL49		RCSD1
KIF5C					CNN2	DVL2	MRPL50		ARHGDIB
KIFC2					CNN3	E2F3	MRPS12		GIMAP5
KLHL7					CNOT8	EAPP	MRPS28		GIMAP6
KLKB1					CNTNAP3	EEF2	MRPS30		HLA-DMB
KPNA2					COG7	EGLN3	MSH4		PTPRC
KRT8					COL12A1	EGR3	MTHFD1		C10orf128
L1TD1					COL4A5	EIF3F	MTHFD1L		CMBL
LARP7					COL4A6	EIF4G2	MUS81		HLA-DRB5
LCK					COL7A1	ELAVL2	MUTYH		HLA-DPA1
LECT1					COMMD3	ENPP2	MYO1G		ABCG1
LEFTY1					COMMD7	ENSA	NACA		GIMAP7
LGALS8					COPE	EOMES	NCL		HLA-DQA1
LGR4					COTL1	EPHA1	NDOR1		TSHZ2
LIN28A					COX6A1	EPM2AIP1	NDUFA13		RGCC
LRIG1					CPT1A	ERBB2	NDUFS1		CCR1
LRP8					CRYZ	ERRFI1	NDUFS6		NPR3
LRRN1					CS	ETHE1	NEK8		RSAD2
LSR					CSNK1E	EXOC5	NFE2L1		GIMAP1
LYPLA1					CSTF1	EXOSC5	NFKBIL1		TNFSF10
M6PR					CSTF3	EXOSC9	NFYC		AFTPH
MAD2L2					CTGF	EXPH5	NMD3		NA
MAK16					CXADR	FAM124A	NME1		MALAT1
MAL2					CYB5B	FAM134C	NOLC1		UBXN2A
MAN2A1					CYLD	FAM168A	NPM1		PDE4C
MAP7					CYP1B1	FAM60A	NUP50		GIMAP8
MARS					CYP2R1	FAM63B	NUTF2		FYB
MAT2A					CYP2S1	FAM76B	NVL		MS4A7
MCM10					CYR61	FAM96A	OSGEP		C5orf56
MCM2					DARS2	FAM98A	PAICS		LOC400931
MCM3					DCAF11	FANCC	PASK		MLLT6
MCM4					DCAF13	FANCF	PCBP1		CTSS
MCM5					DCAKD	FARSA	PFN1		ZBTB20
MCM6					DCLRE1C	FBXL14	PIGW
MCM7					DCTN5	FBXL19	PLA2G6
MDN1					DCUN1D5	FBXO11	PLEKHJ1
MED14					DCX	FBXO16	PLK4
MFGE8					DDA1	FBXW11	PLOD3
MGST1					DDX17	FEM1A	PMF1
MICB					DDX18	FEZ1	PNN
MIS18A					DDX20	FGF2	PNPLA2
MIS18BP1					DDX23	FGFR1	POLH
MRS2					DDX39A	FGFR2	POLR3B
MSH2					DDX41	FICD	POP7
MSH6					DDX49	FIP1L1	PPAN
MTA3					DDX5	FOXJ2	PPCS
MTF2					DHCR7	FOXN3	PPID
MTHFD1					DHDDS	FOXO1	PPP1R15B
MTHFD2					DHRS3	FOXP1	PPP1R7
MYO19					DHX38	FRAT2	PRDX1
NAA15					DIDO1	FTL	PRKAB1
NANOG					DIRC2	FUS	PRKDC
NASP					DKK1	FXYD5	PRPF19
NCAPG2					DLGAP5	FZD1	PRPF38B
NCAPH					DMXL1	FZD10	PSAT1
NDUFAF4					DNAJB14	FZD2	PSME3
NFE2L3					DNAJC16	FZD3	PTBP1
NFYB					DNAJC2	FZD7	RAB25
NLGN4X					DNAJC8	G3BP1	RAB34
NLN					DNAJC9	GADD45G	RAD1
NMU					DNM2	GBF1	RAD50
NOC3L					DPAGT1	GDAP1	RAF1
NODAL					DPCD	GGA1	RANBP1
NOL11					DPM1	GGPS1	RANBP2
NOLC1					DPPA4	GJA1	RBKS
NOP16					DPYSL2	GNA13	RCC1
NOP56					DPYSL3	GNAI1	RDH10
NPM1					DRAM2	GNG10	RGS14
NPM3					DSCC1	GNPTAB	RLBP1
NTHL1					DTNA	GPC6	RNF4
NTS					DTX2	GRHL2	RNF41
NUDT1					DUSP12	GRID2	RNMT
NUDT15					DUSP6	GRK6	RPL14
NUDT21					DVL2	GSK3A	RPL18
NUP107					DYM	GSK3B	RPL23
NUP37					E2F3	GSPT2	RPL23A
OAZ2					EEF1E1	GTPBP3	RPL28
OIP5					EEF2	GXYLT1	RPL3
OLFM1					EGLN3	H2AFJ	RPL32
ORC1					EHBP1	H2AFX	RPL35A
PAICS					EHD4	H3F3B	RPL37
PAK1					EIF2A	HAS2	RPL7
PAK1IP1					EIF2AK3	HBP1	RPLP1
PARP1					EIF3D	HDAC2	RPLP2
PASK					EIF3F	HDAC9	RPS11
PCDH1					EIF4B	HECTD2	RPS12
PDCD2					EIF4ENIF1	HELLS	RPS13
PDK1					EIF4G2	HEPH	RPS14
PFAS					ELL2	HESX1	RPS19
PIK3CB					ENPP2	HEXIM2	RPS24
PIM2					ENSA	HHEX	RPS25
PIPOX					ENTPD1	HIF1AN	RPS27A
PITPNC1					EOMES	HIST1H4C	RPS27L
PLA2G16					EPHA1	HIST2H2AA3	RPS3
PLCB3					EPM2AIP1	HIST2H2BE	RRM2
PMAIP1					EPS15L1	HIST3H2A	RRS1
PNISR					ERBB2	HLTF	S100A13
PNN					ERCC1	HMBOX1	SAMD10
PODXL					ERH	HMG20A	SARS2
POLE2					ETNK1	HMOX1	SCAMP4
POLR3G					EXD2	HN1	SEH1L
POU5F1					EXOC4	HNRNPA1	SESN2
PPM1B					EXOSC5	HNRNPA2B1	SF3A1
PPP2R1B					EXOSC9	HNRNPC	SF3A2
PPP2R2B					EXPH5	HNRNPK	SF3B3
PRDM14					EXTL2	HNRNPL	SLBP
PRIM1					F11R	HNRNPUL1	SLC16A1
PRIM2					FAM124A	HSD17B12	SLC25A10
PRKD3					FAM131B	HSP90AB1	SLC33A1
PRKX					FAM134C	HSP90B1	SLC3A2
PRMT3					FAM192A	HSPA13	SLC5A5
PROM1					FAM20C	HUWE1	SLC6A9
PRPF40A					FAM35A	ICMT	SLC7A6
PRPS1					FAM63B	ID1	SLC9A8
PSIP1					FAM72B	IDH3G	SMARCAD1
PTPN2					FAM96A	IER5L	SNRPA
PTPRZ1					FANCA	IFI16	SNRPA1
PTTG1					FANCF	IGF2BP3	SNRPE
PUS1					FANCL	IGFBP2	SNX5
PUS7					FARSA	IK	SOD1
PYCR2					FAT1	ILF2	SOS1
RAB3B					FBLN1	ILF3	SP1
RABGAP1L					FBXL14	ING4	SPHK2
RAD51AP1					FBXO31	INHBA	SS18
RAD54B					FBXW11	INO80C	ST13
RAP1GAP2					FDPS	INO80D	STC2
RARRES2					FEM1A	IRX2	STX12
RBBP8					FEM1C	IWS1	SUMF1
RCC2					FERMT1	JARID2	SUPV3L1
RFC3					FEZ1	JUP	SUZ12
RFC4					FGF2	KANK1	TACC3
RNF138					FGFR1	KAT6A	TAF12
ROBO1					FGFR2	KCNMB4	TAF15
RPS24					FHIT	KCNN2	TARBP2
RRAS2					FKBP1B	KDM3A	TBC1D17
RRM2					FOPNL	KDR	TBRG4
RRP15					FOXJ2	KIAA0319L	TCEA1
RUVBL1					FOXN3	KIAA0368	TCP1
SALL1					FOXO1	KIAA0391	THRAP3
SALL2					FOXO3	KIAA1143	TIAL1
SALL4					FRAT2	KIF11	TIMM9
SCGB3A2					FUS	KIF15	TM9SF4
SCNN1A					FXR1	KIF20B	TNFAIP1
SEMA6A					FXYD5	KIF26A	TNPO3
SEPHS1					FZD10	KIF2C	TOE1
SERBP1					FZD2	KLF5	TOMM20
SFRP1					FZD7	KLHL5	TOPORS
SFRP2					FZD8	KNTC1	TRAPPC4
SIRT1					GALK2	KPNA3	TRAPPC6B
SLC13A3					GANC	LAMA4	TRIM8
SLC16A1					GART	LAMTOR2	TRIP13
SLC29A1					GAS2L1	LARP7	TRNT1
SLC38A1					GATA6	LASP1	TUBA3C
SLC39A10					GATAD1	LEFTY1	UBE2I
SLC6A8					GBF1	LEFTY2	UBQLN4
SLC7A3					GDE1	LHPP	UNG
SMS					GDF3	LINC00337	VPS16
SNRPA					GGA1	LINGO1	WDR34
SNRPN					GJA1	LOXL2	WEE1
SORL1					GLA	LRAT	XPO5
SOX2					GLG1	LRFN3	XRN2
SPC25					GLIPR2	LRP2	ZBTB37
SPRY4					GLUD1	LRRN1	ZCCHC7
SRA1					GNA13	LSG1	ZDHHC16
SRSF1					GNAI1	LSM3	ZFP36L2
SRSF7					GNG10	LSM4	ZGPAT
SSB					GNG12	LYPD1	ZMYND12
ST6GAL1					GNPTAB	MAGED2	ZNHIT1
SYNGR3					GOLGA4	MAN2C1	ZNHIT2
TCF7L1					GOLIM4	MAP3K11
TDGF1					GORASP2	MAP3K12
TEAD4					GPC4	MAPRE2
TERF1					GPC6	MAST1
TFAM					GPN1	MAT2B
TIA1					GPR108	MCTS1
TMEFF1					GRHL2	MDC1
TMEM177					GRIPAP1	MED12
TMPO					GRPEL2	MED17
TMX1					GSK3A	MED25
TNNT1					GSPT2	MEX3C
TNPO3					GSTCD	MGEA5
TRIM22					GSTT2	MKKS
TRIM24					GTF2E1	MLH1
TTLL12					GTF2H2	MLLT10
TUBB2B					GTF3C4	MOBP
TUBB4B					GTPBP1	MORF4L1
UGP2					GTPBP3	MORF4L2
UNG					GXYLT1	MOSPD3
USO1					GYPC	MPND
USP44					H2AFJ	MRPL15
USP9X					H2AFX	MRPL43
UTF1					H2AFZ	MRPL47
VRTN					HAS2	MRPS11
VSNL1					HBP1	MRPS18B
WDHD1					HCFC1R1	MRPS23
WDR12					HECTD2	MRPS27
ZIC2					HELLS	MRPS31
ZIC3					HESX1	MSC
ZNF195					HEXIM2	MSL3
ZNF267					HEY2	MTF2
ZNF398					HHEX	MTM1
ZNF589					HIGD2A	MTSS1
ZNF770					HIST1H2BD	MUS81
ZSCAN10					HIST1H4C	MYNN
UGP2
UNG
USO1
USP44
USP9X
UTF1
VRTN
VSNL1
WBSCR16
WDHD1
WDR12
ZIC2
ZIC3
ZNF195
ZNF267
ZNF398
ZNF589
ZNF770
ZSCAN10
