# Supplementary material for: Spatial-transcriptomics reveals unique defining molecular features of 5-aminolevulinic acid+ infiltrative tumor cells associated with glioblastoma recurrence and poor survival
Source: Research Square preprint supplement (doi:10.21203/rs.3.rs-780275/v1), 2021-08-04
Supplement: Supplementary file 2 [file Supplementary table 10.xlsx]

## Sheet: GPM
	beta	HR (95% CI for HR)	wald.test	p.value
FURIN	0.54	1.7 (1.3-2.3)	13	0.00038
FES	0.53	1.7 (1.3-2.3)	12	0.00048
CTSB	0.34	1.4 (1.1-1.7)	9.6	0.0019
ITGA5	0.33	1.4 (1.1-1.7)	8.7	0.0031
LTBP2	0.28	1.3 (1.1-1.6)	7.7	0.0056
TCIRG1	0.33	1.4 (1.1-1.8)	7.7	0.0056
METRNL	0.31	1.4 (1.1-1.7)	7	0.0079
IL4R	0.33	1.4 (1.1-1.8)	6.3	0.012
NRP1	0.28	1.3 (1.1-1.6)	5.9	0.015
MGAT1	0.45	1.6 (1-2.4)	4.4	0.037
C5AR1	0.16	1.2 (1-1.4)	4.1	0.043
DAB2	0.2	1.2 (0.97-1.5)	2.9	0.087
FOSL2	0.17	1.2 (0.97-1.4)	2.8	0.091
PARVG	0.23	1.3 (0.94-1.7)	2.4	0.12
LHFPL2	0.21	1.2 (0.93-1.6)	2.2	0.14
MYH9	0.15	1.2 (0.95-1.4)	2.1	0.15
TBC1D22A	0.3	1.4 (0.83-2.2)	1.5	0.22
MAN2B1	0.17	1.2 (0.89-1.6)	1.4	0.24
RIN3	0.15	1.2 (0.88-1.5)	1.1	0.29
IL10RA	0.1	1.1 (0.91-1.4)	1	0.31

## Sheet: Inf. wound response
	beta	HR (95% CI for HR)	wald.test	p.value
EREG	0.69	2 (1.5-2.7)	21	5.7e-06
PLAUR	0.39	1.5 (1.2-1.8)	15	0.00011
MAP2K3	0.64	1.9 (1.3-2.7)	13	0.00039
FOSL1	0.32	1.4 (1.1-1.6)	12	0.00047
G0S2	0.19	1.2 (1.1-1.4)	10	0.0015
SCARA3	0.35	1.4 (1.1-1.8)	9.5	0.002
ALDH3B1	0.42	1.5 (1.1-2.1)	8	0.0046
SLC16A3	0.28	1.3 (1.1-1.6)	7.4	0.0066
ICAM1	0.22	1.2 (1.1-1.5)	7.4	0.0067
CCL2	0.14	1.1 (1-1.3)	6.6	0.01
PLBD1	0.28	1.3 (1.1-1.7)	6.3	0.012
IL6	0.2	1.2 (1-1.4)	6.1	0.014
NCF2	0.28	1.3 (1.1-1.7)	6	0.014
ABCA13	0.6	1.8 (1.1-3)	5.6	0.018
IKZF3	0.86	2.4 (1.1-5)	5.2	0.022
IL1R2	0.24	1.3 (1-1.6)	5.2	0.023
RILPL2	0.48	1.6 (1.1-2.4)	5.2	0.023
S100A4	0.16	1.2 (1-1.3)	5.2	0.023
CCL20	0.17	1.2 (1-1.4)	5.1	0.024
NFKB2	0.4	1.5 (1-2.1)	4.9	0.026
SERPINE1	0.13	1.1 (1-1.3)	4.8	0.028
B4GALT1	0.22	1.2 (1-1.5)	4.2	0.04
HBEGF	0.24	1.3 (1-1.6)	4.2	0.04
CD180	0.3	1.3 (1-1.8)	4.1	0.042
ITPRIP	0.31	1.4 (1-1.8)	4.1	0.042
C5AR1	0.16	1.2 (1-1.4)	4.1	0.043
CMTM7	0.28	1.3 (1-1.7)	4.1	0.043
FHL2	0.22	1.2 (1-1.6)	4	0.046
CD83	0.28	1.3 (1-1.8)	4	0.047
CYTIP	0.29	1.3 (1-1.8)	3.9	0.047
PTGS2	0.17	1.2 (1-1.4)	3.7	0.053
CXCL2	0.16	1.2 (0.99-1.4)	3.6	0.059
ITGB6	0.92	2.5 (0.97-6.6)	3.6	0.059
CLMP	0.19	1.2 (0.99-1.5)	3.4	0.067
CXCL3	0.14	1.2 (0.99-1.3)	3.2	0.071
CSF2RB	0.25	1.3 (0.97-1.7)	3.1	0.077
CYTH4	0.22	1.2 (0.98-1.6)	3.1	0.078
TPTE2P6	-4.3	0.013 (7.6e-05-2.2)	2.7	0.098
ALOX5AP	0.14	1.1 (0.97-1.4)	2.7	0.1
CXCL8	0.071	1.1 (0.98-1.2)	2.5	0.11
OSM	0.14	1.2 (0.97-1.4)	2.6	0.11
SORBS2	0.32	1.4 (0.93-2)	2.6	0.11
MOV10L1	1.3	3.8 (0.7-21)	2.4	0.12
RAB20	0.19	1.2 (0.95-1.5)	2.5	0.12
SH3TC1	0.23	1.3 (0.93-1.7)	2.3	0.13
GADD45B	0.13	1.1 (0.96-1.4)	2.2	0.14
RNASET2	0.19	1.2 (0.94-1.6)	2.1	0.14
SLITRK6	-0.88	0.42 (0.13-1.3)	2.2	0.14
IL1A	0.24	1.3 (0.92-1.7)	2.1	0.15
IL1B	0.13	1.1 (0.95-1.4)	2.1	0.15
IER2	0.17	1.2 (0.94-1.5)	2	0.16
MAFF	0.17	1.2 (0.94-1.5)	2	0.16
SLC7A7	0.16	1.2 (0.94-1.5)	2	0.16
IRAK2	0.19	1.2 (0.92-1.6)	1.9	0.17
ABL2	0.27	1.3 (0.88-1.9)	1.8	0.18
PTGER4	0.19	1.2 (0.92-1.6)	1.8	0.18
PTPRQ	2.1	7.9 (0.38-160)	1.8	0.18
STX11	0.22	1.2 (0.89-1.7)	1.6	0.21
NFKBIA	0.15	1.2 (0.91-1.5)	1.5	0.22
IL1RN	0.14	1.2 (0.91-1.5)	1.4	0.23
BTBD11	0.11	1.1 (0.92-1.3)	1.3	0.25
CCDC178	-0.33	0.72 (0.4-1.3)	1.2	0.28
PCSK5	0.17	1.2 (0.87-1.6)	1.2	0.28
CYBA	0.11	1.1 (0.91-1.4)	1.1	0.29
THEGL	0.64	1.9 (0.58-6.3)	1.1	0.29
PLS1	-0.3	0.74 (0.42-1.3)	1.1	0.3
PRDM1	0.19	1.2 (0.84-1.8)	1.1	0.3
ENPP5	0.068	1.1 (0.94-1.2)	0.99	0.32
NEK1	-0.21	0.81 (0.54-1.2)	0.99	0.32
SERPINB9	0.15	1.2 (0.86-1.6)	0.9	0.34
LEKR1	0.61	1.8 (0.52-6.5)	0.88	0.35
PIGR	-0.61	0.54 (0.14-2.2)	0.76	0.38
IL18	0.079	1.1 (0.89-1.3)	0.66	0.42
TNFAIP8L3	0.074	1.1 (0.9-1.3)	0.63	0.43
EHF	0.52	1.7 (0.4-7.1)	0.51	0.48
ITGA9	-0.14	0.87 (0.59-1.3)	0.47	0.49
DUSP1	0.047	1 (0.91-1.2)	0.43	0.51
ABI3BP	-0.069	0.93 (0.76-1.2)	0.41	0.52
ATP8B4	0.15	1.2 (0.73-1.9)	0.4	0.52
GJB3	0.19	1.2 (0.67-2.2)	0.4	0.53
GNA14	0.083	1.1 (0.82-1.4)	0.33	0.57
SNTB2	0.12	1.1 (0.7-1.8)	0.24	0.62
MUC17	-22	3.4e-10 (1.3e-52-8.6e+32)	0.19	0.66
KLF2	0.057	1.1 (0.82-1.4)	0.18	0.67
NR4A2	0.044	1 (0.81-1.3)	0.12	0.73
RGS1	0.02	1 (0.89-1.2)	0.09	0.76
NDNF	0.031	1 (0.84-1.3)	0.09	0.77
TGM4	-0.15	0.86 (0.002-370)	0	0.96
XKR3	-0.019	0.98 (0.31-3.2)	0	0.97

## Sheet: Inflammatory response
	beta	HR (95% CI for HR)	wald.test	p.value
OSMR	0.38	1.5 (1.2-1.7)	19	1.6e-05
BDKRB1	0.99	2.7 (1.4-5)	9.6	0.0019
ITGA5	0.33	1.4 (1.1-1.7)	8.7	0.0031
P2RY2	0.81	2.2 (1.3-4)	7.5	0.0062
CCR7	0.63	1.9 (1.2-2.9)	7.4	0.0064
ICAM1	0.22	1.2 (1.1-1.5)	7.4	0.0067
LIF	0.18	1.2 (1-1.4)	6.9	0.0087
CD40	0.36	1.4 (1.1-1.9)	6.8	0.0094
CCL2	0.14	1.1 (1-1.3)	6.6	0.01
IL4R	0.33	1.4 (1.1-1.8)	6.3	0.012
CCL5	0.23	1.3 (1-1.5)	6.2	0.013
IL6	0.2	1.2 (1-1.4)	6.1	0.014
NOD2	0.48	1.6 (1.1-2.4)	5.6	0.018
CCL20	0.17	1.2 (1-1.4)	5.1	0.024
GPR132	0.45	1.6 (1.1-2.3)	5	0.026
SPHK1	0.24	1.3 (1-1.6)	4.9	0.027
SERPINE1	0.13	1.1 (1-1.3)	4.8	0.028
MET	0.14	1.2 (1-1.3)	4.8	0.029
IL1R1	0.21	1.2 (1-1.5)	4.7	0.03
ICOSLG	0.7	2 (1-3.9)	4.4	0.037
HBEGF	0.24	1.3 (1-1.6)	4.2	0.04
MARCO	0.12	1.1 (1-1.3)	4.2	0.04
C5AR1	0.16	1.2 (1-1.4)	4.1	0.043
CD14	0.14	1.2 (0.99-1.3)	3.5	0.062
GNA15	0.21	1.2 (0.98-1.5)	3.3	0.07
CSF3	0.17	1.2 (0.99-1.4)	3.2	0.071
TLR2	0.17	1.2 (0.97-1.5)	2.7	0.099
CXCL8	0.071	1.1 (0.98-1.2)	2.5	0.11
NFKB1	0.35	1.4 (0.93-2.2)	2.6	0.11
PIK3R5	0.22	1.2 (0.94-1.6)	2.4	0.12
CSF1	0.16	1.2 (0.95-1.4)	2.1	0.15
IL1A	0.24	1.3 (0.92-1.7)	2.1	0.15
IL1B	0.13	1.1 (0.95-1.4)	2.1	0.15
IRAK2	0.19	1.2 (0.92-1.6)	1.9	0.17
MSR1	0.12	1.1 (0.95-1.3)	1.9	0.17
PTGER4	0.19	1.2 (0.92-1.6)	1.8	0.18
TLR1	0.19	1.2 (0.91-1.6)	1.8	0.18
CMKLR1	0.14	1.2 (0.93-1.4)	1.7	0.19
IL10	0.17	1.2 (0.92-1.5)	1.7	0.19
TACR3	-2.6	0.076 (0.0017-3.5)	1.7	0.19
LDLR	0.13	1.1 (0.93-1.4)	1.6	0.2
NFKBIA	0.15	1.2 (0.91-1.5)	1.5	0.22
OLR1	0.095	1.1 (0.94-1.3)	1.4	0.23
RIPK2	-0.27	0.76 (0.47-1.2)	1.2	0.28
IL10RA	0.1	1.1 (0.91-1.4)	1	0.31
MEP1A	-0.54	0.58 (0.19-1.7)	0.93	0.33
SCARF1	0.16	1.2 (0.81-1.7)	0.72	0.4
IL18	0.079	1.1 (0.89-1.3)	0.66	0.42
NDP	-0.069	0.93 (0.79-1.1)	0.63	0.43
CXCL9	0.069	1.1 (0.9-1.3)	0.59	0.44
PDE4B	-0.087	0.92 (0.73-1.1)	0.58	0.44
NMUR1	0.56	1.8 (0.38-8)	0.53	0.47
CYBB	0.059	1.1 (0.89-1.3)	0.44	0.51
CCL22	0.22	1.2 (0.64-2.4)	0.42	0.52
PTAFR	0.067	1.1 (0.87-1.3)	0.42	0.52
AXL	0.061	1.1 (0.81-1.4)	0.19	0.67
SLC31A2	0.063	1.1 (0.8-1.4)	0.18	0.67
NLRP3	0.073	1.1 (0.76-1.5)	0.17	0.68
KLF6	0.047	1 (0.78-1.4)	0.09	0.76
CCRL2	0.049	1.1 (0.76-1.5)	0.09	0.77
EBI3	0.027	1 (0.84-1.3)	0.07	0.79
ATP2B1	0.026	1 (0.77-1.4)	0.03	0.86
SLC11A2	-0.00023	1 (0.64-1.6)	0	1
ICAM4	NA	NA (NA-NA)	NA	NA

## Sheet: Mesenchymal
	beta	HR (95% CI for HR)	wald.test	p.value
PLAUR	0.39	1.5 (1.2-1.8)	15	0.00011
FURIN	0.54	1.7 (1.3-2.3)	13	0.00038
FES	0.53	1.7 (1.3-2.3)	12	0.00048
LRRFIP1	0.77	2.2 (1.4-3.4)	11	0.00089
GRN	0.48	1.6 (1.2-2.2)	9.7	0.0018
CTSB	0.34	1.4 (1.1-1.7)	9.6	0.0019
ITGA5	0.33	1.4 (1.1-1.7)	8.7	0.0031
CTSZ	0.27	1.3 (1.1-1.6)	8.6	0.0034
ALDH3B1	0.42	1.5 (1.1-2.1)	8	0.0046
LTBP2	0.28	1.3 (1.1-1.6)	7.7	0.0056
TCIRG1	0.33	1.4 (1.1-1.8)	7.7	0.0056
SLC16A3	0.28	1.3 (1.1-1.6)	7.4	0.0066
TRADD	0.53	1.7 (1.1-2.5)	6.7	0.0095
EMP3	0.2	1.2 (1-1.4)	6.5	0.011
MAN1A1	0.27	1.3 (1.1-1.6)	6.4	0.011
IL4R	0.33	1.4 (1.1-1.8)	6.3	0.012
PLBD1	0.28	1.3 (1.1-1.7)	6.3	0.012
NRP1	0.28	1.3 (1.1-1.6)	5.9	0.015
RRAS	0.28	1.3 (1.1-1.7)	5.7	0.017
CDCP1	0.26	1.3 (1-1.6)	5.6	0.018
NOD2	0.48	1.6 (1.1-2.4)	5.6	0.018
ASL	0.4	1.5 (1.1-2.1)	5.5	0.019
AMPD3	0.31	1.4 (1.1-1.8)	5.4	0.02
SLC10A3	0.39	1.5 (1.1-2)	5.4	0.02
SLC11A1	0.2	1.2 (1-1.4)	5.2	0.023
MFSD1	0.37	1.4 (1-2)	5.1	0.024
SERPINE1	0.13	1.1 (1-1.3)	4.8	0.028
CTSC	0.23	1.3 (1-1.5)	4.7	0.029
COLGALT1	0.33	1.4 (1-1.9)	4.7	0.03
DRAM1	0.29	1.3 (1-1.7)	4.7	0.03
IL1R1	0.21	1.2 (1-1.5)	4.7	0.03
ALOX5	0.21	1.2 (1-1.5)	4.6	0.032
TGFBI	0.14	1.2 (1-1.3)	4.6	0.033
FCGR2A	0.2	1.2 (1-1.5)	4.5	0.035
MGAT1	0.45	1.6 (1-2.4)	4.4	0.037
THBS1	0.12	1.1 (1-1.3)	4.4	0.037
ANXA1	0.14	1.2 (1-1.3)	4.2	0.039
PLA2G15	0.41	1.5 (1-2.2)	4.2	0.04
FMNL1	0.27	1.3 (1-1.7)	4.2	0.042
FPR3	0.18	1.2 (1-1.4)	4.1	0.042
C5AR1	0.16	1.2 (1-1.4)	4.1	0.043
FHL2	0.22	1.2 (1-1.6)	4	0.046
BNC2	0.38	1.5 (1-2.1)	3.8	0.05
SHC1	0.2	1.2 (1-1.5)	3.8	0.05
CCR5	0.24	1.3 (1-1.6)	3.7	0.054
CD14	0.14	1.2 (0.99-1.3)	3.5	0.062
COL8A2	0.17	1.2 (0.99-1.4)	3.4	0.064
SIGLEC9	0.21	1.2 (0.99-1.5)	3.4	0.064
PHF11	0.26	1.3 (0.98-1.7)	3.4	0.065
TNFRSF11A	0.4	1.5 (0.98-2.3)	3.4	0.065
TRPM2	0.25	1.3 (0.98-1.7)	3.4	0.067
TNFAIP8	0.37	1.4 (0.97-2.1)	3.3	0.069
GNA15	0.21	1.2 (0.98-1.5)	3.3	0.07
CYTH4	0.22	1.2 (0.98-1.6)	3.1	0.078
ENG	0.23	1.3 (0.97-1.6)	3	0.084
DAB2	0.2	1.2 (0.97-1.5)	2.9	0.087
SEC24D	0.27	1.3 (0.96-1.8)	2.9	0.087
TLR2	0.17	1.2 (0.97-1.5)	2.7	0.099
MAPK13	0.24	1.3 (0.95-1.7)	2.7	0.1
SWAP70	0.23	1.3 (0.95-1.7)	2.6	0.11
MYOF	0.16	1.2 (0.95-1.4)	2.3	0.13
ST14	0.17	1.2 (0.95-1.5)	2.3	0.13
LHFPL2	0.21	1.2 (0.93-1.6)	2.2	0.14
MYH9	0.15	1.2 (0.95-1.4)	2.1	0.15
SIGLEC7	0.17	1.2 (0.94-1.5)	2	0.16
MSR1	0.12	1.1 (0.95-1.3)	1.9	0.17
ARHGAP29	0.25	1.3 (0.89-1.9)	1.8	0.18
BLVRB	0.17	1.2 (0.93-1.5)	1.8	0.18
PTGER4	0.19	1.2 (0.92-1.6)	1.8	0.18
STXBP2	0.23	1.3 (0.9-1.7)	1.8	0.18
THEMIS2	0.13	1.1 (0.94-1.4)	1.8	0.18
UCP2	0.13	1.1 (0.94-1.4)	1.7	0.19
SP100	0.18	1.2 (0.91-1.6)	1.6	0.21
TEC	0.53	1.7 (0.71-4)	1.4	0.23
DSC2	0.27	1.3 (0.83-2.1)	1.4	0.24
MAN2B1	0.17	1.2 (0.89-1.6)	1.4	0.24
PYGL	0.12	1.1 (0.92-1.4)	1.4	0.24
MAN2A1	0.15	1.2 (0.87-1.6)	1.1	0.3
SAT1	0.11	1.1 (0.91-1.4)	1	0.31
CASP5	0.29	1.3 (0.73-2.5)	0.87	0.35
SYNGR2	0.1	1.1 (0.88-1.4)	0.81	0.37
RAB11FIP1	0.22	1.2 (0.76-2)	0.73	0.39
CD4	0.075	1.1 (0.88-1.3)	0.55	0.46
C1orf54	0.067	1.1 (0.85-1.3)	0.32	0.57
FOLR2	0.0086	1 (0.9-1.1)	0.02	0.88

## Sheet: MTC
	beta	HR (95% CI for HR)	wald.test	p.value
PRSS22	1.4	4 (0.76-22)	2.7	0.1
RPL27	-0.13	0.88 (0.71-1.1)	1.4	0.24
ALKBH7	-0.14	0.87 (0.67-1.1)	1.1	0.3
AQP10	4.7	110 (0.0068-1900000)	0.91	0.34
PFDN5	-0.091	0.91 (0.74-1.1)	0.74	0.39
MRPL54	-0.085	0.92 (0.75-1.1)	0.65	0.42
NDUFB7	-0.084	0.92 (0.74-1.1)	0.61	0.43
NDUFA7	-0.28	0.75 (0.36-1.6)	0.55	0.46
MRPS15	-0.08	0.92 (0.7-1.2)	0.32	0.57
C19orf53	-0.057	0.95 (0.72-1.2)	0.17	0.68
COX5B	-0.057	0.94 (0.72-1.2)	0.17	0.68
DPM3	-0.024	0.98 (0.79-1.2)	0.05	0.83
COX6A1	-0.0095	0.99 (0.78-1.3)	0.01	0.94
NDUFB1	-0.0033	1 (0.77-1.3)	0	0.98

## Sheet: TNFA
	beta	HR (95% CI for HR)	wald.test	p.value
PLAUR	0.39	1.5 (1.2-1.8)	15	0.00011
MAP2K3	0.64	1.9 (1.3-2.7)	13	0.00039
FOSL1	0.32	1.4 (1.1-1.6)	12	0.00047
LITAF	0.62	1.9 (1.3-2.7)	11	0.00089
BCL3	0.32	1.4 (1.1-1.7)	10	0.0014
SOCS3	0.22	1.2 (1.1-1.4)	10	0.0014
NFKBIE	0.65	1.9 (1.2-3)	8.3	0.004
BIRC3	0.27	1.3 (1.1-1.6)	8	0.0046
CSF2	1.2	3.4 (1.4-8.2)	7.5	0.0062
ICAM1	0.22	1.2 (1.1-1.5)	7.4	0.0067
DUSP5	0.27	1.3 (1.1-1.6)	6.9	0.0085
LIF	0.18	1.2 (1-1.4)	6.9	0.0087
CCL2	0.14	1.1 (1-1.3)	6.6	0.01
PHLDA2	0.2	1.2 (1-1.4)	6.3	0.012
CCL5	0.23	1.3 (1-1.5)	6.2	0.013
IL6	0.2	1.2 (1-1.4)	6.1	0.014
TNFAIP2	0.2	1.2 (1-1.4)	5.7	0.017
CCL20	0.17	1.2 (1-1.4)	5.1	0.024
NFKB2	0.4	1.5 (1-2.1)	4.9	0.026
SPHK1	0.24	1.3 (1-1.6)	4.9	0.027
SERPINE1	0.13	1.1 (1-1.3)	4.8	0.028
DRAM1	0.29	1.3 (1-1.7)	4.7	0.03
TUBB2A	0.32	1.4 (1-1.8)	4.6	0.031
ICOSLG	0.7	2 (1-3.9)	4.4	0.037
B4GALT1	0.22	1.2 (1-1.5)	4.2	0.04
HBEGF	0.24	1.3 (1-1.6)	4.2	0.04
CD83	0.28	1.3 (1-1.8)	4	0.047
PTGS2	0.17	1.2 (1-1.4)	3.7	0.053
CXCL2	0.16	1.2 (0.99-1.4)	3.6	0.059
CD44	0.16	1.2 (0.99-1.4)	3.4	0.065
TNFAIP8	0.37	1.4 (0.97-2.1)	3.3	0.069
CXCL3	0.14	1.2 (0.99-1.3)	3.2	0.071
NINJ1	0.24	1.3 (0.97-1.7)	3	0.084
PPP1R15A	0.23	1.3 (0.97-1.6)	3	0.084
FOSL2	0.17	1.2 (0.97-1.4)	2.8	0.091
TLR2	0.17	1.2 (0.97-1.5)	2.7	0.099
CDKN1A	0.13	1.1 (0.97-1.3)	2.6	0.11
NFKB1	0.35	1.4 (0.93-2.2)	2.6	0.11
GADD45B	0.13	1.1 (0.96-1.4)	2.2	0.14
SPSB1	0.18	1.2 (0.94-1.5)	2.2	0.14
CSF1	0.16	1.2 (0.95-1.4)	2.1	0.15
IL1A	0.24	1.3 (0.92-1.7)	2.1	0.15
IL1B	0.13	1.1 (0.95-1.4)	2.1	0.15
IER2	0.17	1.2 (0.94-1.5)	2	0.16
MAFF	0.17	1.2 (0.94-1.5)	2	0.16
MAP3K8	0.15	1.2 (0.94-1.4)	1.9	0.17
PTGER4	0.19	1.2 (0.92-1.6)	1.8	0.18
ZFP36	0.11	1.1 (0.95-1.3)	1.7	0.19
LDLR	0.13	1.1 (0.93-1.4)	1.6	0.2
NFKBIA	0.15	1.2 (0.91-1.5)	1.5	0.22
DUSP2	0.12	1.1 (0.93-1.4)	1.4	0.23
OLR1	0.095	1.1 (0.94-1.3)	1.4	0.23
PLEK	0.12	1.1 (0.92-1.4)	1.3	0.26
DUSP4	0.092	1.1 (0.93-1.3)	1.2	0.27
RIPK2	-0.27	0.76 (0.47-1.2)	1.2	0.28
SIK1	0.34	1.4 (0.75-2.6)	1.1	0.29
RNF19B	0.2	1.2 (0.84-1.8)	1.1	0.3
SAT1	0.11	1.1 (0.91-1.4)	1	0.31
TRIB1	0.18	1.2 (0.85-1.7)	1	0.31
ETS2	0.14	1.1 (0.87-1.5)	0.96	0.33
SGK1	-0.093	0.91 (0.75-1.1)	0.83	0.36
KLF4	0.13	1.1 (0.83-1.6)	0.67	0.41
EGR3	0.077	1.1 (0.9-1.3)	0.66	0.42
IL18	0.079	1.1 (0.89-1.3)	0.66	0.42
PDE4B	-0.087	0.92 (0.73-1.1)	0.58	0.44
ATF3	0.071	1.1 (0.88-1.3)	0.51	0.47
DDX58	-0.087	0.92 (0.72-1.2)	0.49	0.49
PANX1	0.11	1.1 (0.81-1.5)	0.48	0.49
EGR2	0.065	1.1 (0.89-1.3)	0.47	0.5
DUSP1	0.047	1 (0.91-1.2)	0.43	0.51
PNRC1	-0.1	0.9 (0.62-1.3)	0.31	0.58
KDM6B	0.068	1.1 (0.83-1.4)	0.28	0.6
DNAJB4	-0.1	0.9 (0.61-1.3)	0.26	0.61
NR4A1	0.05	1.1 (0.87-1.3)	0.27	0.61
KLF2	0.057	1.1 (0.82-1.4)	0.18	0.67
NR4A3	0.06	1.1 (0.79-1.4)	0.17	0.68
PER1	0.035	1 (0.87-1.2)	0.15	0.7
CCL4	0.025	1 (0.89-1.2)	0.13	0.72
NR4A2	0.044	1 (0.81-1.3)	0.12	0.73
SMAD3	-0.057	0.94 (0.67-1.3)	0.11	0.74
KLF6	0.047	1 (0.78-1.4)	0.09	0.76
CCRL2	0.049	1.1 (0.76-1.5)	0.09	0.77
BTG3	-0.046	0.95 (0.69-1.3)	0.08	0.78
REL	-0.099	0.91 (0.35-2.3)	0.04	0.84
ATP2B1	0.026	1 (0.77-1.4)	0.03	0.86
ID2	-0.02	0.98 (0.74-1.3)	0.02	0.89
B4GALT5	0.013	1 (0.74-1.4)	0.01	0.94
BIRC2	0.018	1 (0.64-1.6)	0.01	0.94
CCNL1	0.0093	1 (0.71-1.4)	0	0.96
IRS2	0.0054	1 (0.82-1.2)	0	0.96
PDLIM5	0.0013	1 (0.76-1.3)	0	0.99
