# Supplementary material for: Spatial-transcriptomics reveals unique defining molecular features of 5-aminolevulinic acid+ infiltrative tumor cells associated with glioblastoma recurrence and poor survival
Source: Research Square preprint supplement (doi:10.21203/rs.3.rs-780275/v1), 2021-08-04
Supplement: Supplementary file 3 [file Supplementary table 11.xlsx]

## Sheet: TCGA paired recurrent
pathway	pval	padj	log2err	ES	NES	size	leadingEdge	leadingEdge.symbol
Stemness	0.000125546	0.00100437	0.518848	0.699566	1.89249	37	5368, 345557, 146713, 6262, 84189, 9348, 79827, 5649, 25890, 115701, 26298, 133396, 3569, 374462, 2707	PNOC, PLCXD3, RBFOX3, RYR2, SLITRK6, NDST3, CLMP, RELN, ABI3BP, ALPK2, EHF, IL31RA, IL6, PTPRQ, GJB3
Inf..wound.Res.	0.00042095	0.0016838	0.498493	0.491728	1.59918	163	5368, 345557, 146713, 6262, 7306, 84189, 9348, 55359, 56978, 79827, 5649, 25890, 2192, 115701, 22806, 26298, 8877, 3554, 23213, 2069, 133396, 339366, 3569, 374462, 2707, 2683, 112616, 3383, 10964, 3790, 400451, 2803, 2995, 9123, 7047, 3680, 5784, 91624, 4929, 388121, 162394, 3909, 10581, 968, 4791, 54863, 8470, 1439, 4212, 5743, 51435, 2673, 27, 8061, 94240, 10142, 2242, 3694, 2114, 140766, 12155…	PNOC, PLCXD3, RBFOX3, RYR2, TYRP1, SLITRK6, NDST3, STYK1, PRDM8, CLMP, RELN, ABI3BP, FBLN1, ALPK2, IKZF3, EHF, SPHK1, IL1R1, SULF1, EREG, IL31RA, ADAMTSL5, IL6, PTPRQ, GJB3, B4GALT1, CMTM7, ICAM1, IFI44L, KCNS3, FAM174B, GOLGA4, GYPC, SLC16A3, TGM4, ITGA9, PTPN14, NEXN, NR4A2, TNFAIP8L3, SLFN5, LAMA3, IFITM2, CD68, NFKB2, TOR4A, SORBS2, CSF2RB, MEIS2, PTGS2, SCARA3, GFPT1, ABL2, FOSL1, EPSTI1, AK…
Mesenchymal	0.00498802	0.0133014	0.407018	0.513499	1.55213	86	2350, 7057, 3554, 54796, 4627, 26509, 9123, 4053, 2359, 1601, 2022, 80223, 3678, 3566, 4121, 1522, 8829, 1296, 2242, 7226, 4124, 1075, 929, 752, 27128, 1508, 8273, 5045, 284119, 5329, 221, 6813, 23659, 2896, 7006, 7045, 79709, 9208, 5054, 64866, 2274, 9871, 4125, 6464, 6768, 25816, 1824	FOLR2, THBS1, IL1R1, BNC2, MYH9, MYOF, SLC16A3, LTBP2, FPR3, DAB2, ENG, RAB11FIP1, ITGA5, IL4R, MAN1A1, CTSZ, NRP1, COL8A2, FES, TRPM2, MAN2A1, CTSC, CD14, FMNL1, CYTH4, CTSB, SLC10A3, FURIN, CAVIN1, PLAUR, ALDH3B1, STXBP2, PLA2G15, GRN, TEC, TGFBI, COLGALT1, LRRFIP1, SERPINE1, CDCP1, FHL2, SEC24D, MAN2B1, SHC1, ST14, TNFAIP8, DSC2
GPM	0.0407876	0.0652602	0.266351	0.611746	1.4876	20	4627, 4053, 1601, 3678, 3566, 8829, 2242, 1508, 284207, 5045, 25771, 3587, 4125, 79890, 64098, 4245, 2355	MYH9, LTBP2, DAB2, ITGA5, IL4R, NRP1, FES, CTSB, METRNL, FURIN, TBC1D22A, IL10RA, MAN2B1, RIN3, PARVG, MGAT1, FOSL2
Inf..Res.	0.267456	0.356607	0.0845557	0.390459	1.14155	63	6870, 5029, 1240, 8877, 3554, 4283, 3569, 3383, 23308, 623, 6352, 1440, 3678, 3566, 558, 5724, 929, 3586, 3587, 9180, 29933, 5054, 10316, 1318, 1435, 114548, 6347	TACR3, P2RY2, CMKLR1, SPHK1, IL1R1, CXCL9, IL6, ICAM1, ICOSLG, BDKRB1, CCL5, CSF3, ITGA5, IL4R, AXL, PTAFR, CD14, IL10, IL10RA, OSMR, GPR132, SERPINE1, NMUR1, SLC31A2, CSF1, NLRP3, CCL2
TNFA.signlaing	0.92395	0.92395	0.0218679	0.230887	0.702264	91	3164, 1437, 8877, 8013, 3569, 2683, 3383, 7262, 23308, 6352, 4929, 4791, 5743, 150094, 8061, 602, 23135, 2114, 6351, 5966, 24145, 80176, 10957, 5329, 1960, 23586, 9308, 5054, 4814, 23764, 23645, 10365, 1435, 25816, 6347	NR4A1, CSF2, SPHK1, NR4A3, IL6, B4GALT1, ICAM1, PHLDA2, ICOSLG, CCL5, NR4A2, NFKB2, PTGS2, SIK1, FOSL1, BCL3, KDM6B, ETS2, CCL4, REL, PANX1, SPSB1, PNRC1, PLAUR, EGR3, DDX58, CD83, SERPINE1, NINJ1, MAFF, PPP1R15A, KLF2, CSF1, TNFAIP8, CCL2

## Sheet: TCGA unpaied recurrent 
pathway	pval	padj	log2err	ES	NES	size	leadingEdge	leadingEdge.symbol
Inf..Res.	1e-10	2.66667e-10		0.719006	2.39491	63	8685, 1440, 3569, 623, 3383, 5029, 3554, 6364, 6347, 3576, 5054, 4233, 3976, 23308, 6870, 6352, 64127, 4283, 1240, 3586, 1236, 929, 2769, 29933, 1318, 3587, 4481, 728, 5734, 1536, 3678, 3566, 3553, 7097, 114548, 3656, 9180, 490, 1316, 958, 3552, 7096, 1435, 1839, 23533, 6367	MARCO, CSF3, IL6, BDKRB1, ICAM1, P2RY2, IL1R1, CCL20, CCL2, CXCL8, SERPINE1, MET, LIF, ICOSLG, TACR3, CCL5, NOD2, CXCL9, CMKLR1, IL10, CCR7, CD14, GNA15, GPR132, SLC31A2, IL10RA, MSR1, C5AR1, PTGER4, CYBB, ITGA5, IL4R, IL1B, TLR2, NLRP3, IRAK2, OSMR, ATP2B1, KLF6, CD40, IL1A, TLR1, CSF1, HBEGF, PIK3R5, CCL22
Inf..wound.Res.	1e-10	2.66667e-10		0.670148	2.46929	162	3569, 6262, 345557, 5368, 7306, 115701, 55359, 146713, 2707, 121551, 22806, 3383, 4327, 3554, 6364, 2069, 5743, 6347, 9348, 3576, 5054, 154664, 84144, 26298, 25890, 59084, 84189, 79827, 2921, 9123, 133396, 2683, 1439, 3557, 56978, 140766, 6275, 3680, 2274, 5655, 2920, 5649, 9630, 5329, 27, 3936, 3909, 5008, 8857, 91624, 1520, 400451, 79887, 2803, 374462, 9595, 10142, 6282, 4481, 968, 85450, 752, …	IL6, RYR2, PLCXD3, PNOC, TYRP1, ALPK2, STYK1, RBFOX3, GJB3, BTBD11, IKZF3, ICAM1, MMP19, IL1R1, CCL20, EREG, PTGS2, CCL2, NDST3, CXCL8, SERPINE1, ABCA13, SYDE2, EHF, ABI3BP, ENPP5, SLITRK6, CLMP, CXCL3, SLC16A3, IL31RA, B4GALT1, CSF2RB, IL1RN, PRDM8, ADAMTS14, S100A4, ITGA9, FHL2, KLK10, CXCL2, RELN, GNA14, PLAUR, ABL2, LCP1, LAMA3, OSM, FCGBP, NEXN, CTSS, FAM174B, PLBD1, GOLGA4, PTPRQ, CYTIP, AK…
Mesenchymal	1e-10	2.66667e-10		0.731145	2.51401	86	4053, 7057, 3554, 2350, 5054, 54796, 2359, 80223, 1824, 9123, 64127, 4121, 8829, 25816, 5603, 26509, 64866, 2274, 4627, 1075, 2212, 929, 2769, 5329, 8792, 1522, 7006, 4124, 284119, 272, 7226, 1508, 79887, 1601, 240, 7045, 6768, 5836, 4481, 27036, 752, 838, 728, 5734, 27180, 3678, 3566, 55332, 1296, 221, 7097, 5045, 27128, 301, 9871, 9473, 1234, 920, 79709, 9411, 6556, 6303, 23075, 6672, 2022, 914…	LTBP2, THBS1, IL1R1, FOLR2, SERPINE1, BNC2, FPR3, RAB11FIP1, DSC2, SLC16A3, NOD2, MAN1A1, NRP1, TNFAIP8, MAPK13, MYOF, CDCP1, FHL2, MYH9, CTSC, FCGR2A, CD14, GNA15, PLAUR, TNFRSF11A, CTSZ, TEC, MAN2A1, CAVIN1, AMPD3, TRPM2, CTSB, PLBD1, DAB2, ALOX5, TGFBI, ST14, PYGL, MSR1, SIGLEC7, FMNL1, CASP5, C5AR1, PTGER4, SIGLEC9, ITGA5, IL4R, DRAM1, COL8A2, ALDH3B1, TLR2, FURIN, CYTH4, ANXA1, SEC24D, THEMI…
TNFA.signlaing	1.34512e-10	2.69023e-10	0.826657	0.65096	2.26516	90	3569, 330, 3383, 6364, 5743, 6347, 5054, 3976, 1960, 23308, 6352, 2921, 2355, 2683, 7262, 25816, 9021, 2920, 602, 7127, 5329, 960, 1326, 5966, 5341, 4929, 5734, 55332, 23764, 1843, 1844, 3553, 7097, 24145, 8061, 4791, 8660, 4616, 490, 1316, 6303, 1959, 2114, 9516, 3552, 1435, 1839, 10957, 6351, 23645, 4088, 4792, 23135, 4790, 10221, 11080, 23586, 150094, 7538, 80176	IL6, BIRC3, ICAM1, CCL20, PTGS2, CCL2, SERPINE1, LIF, EGR3, ICOSLG, CCL5, CXCL3, FOSL2, B4GALT1, PHLDA2, TNFAIP8, SOCS3, CXCL2, BCL3, TNFAIP2, PLAUR, CD44, MAP3K8, REL, PLEK, NR4A2, PTGER4, DRAM1, MAFF, DUSP1, DUSP2, IL1B, TLR2, PANX1, FOSL1, NFKB2, IRS2, GADD45B, ATP2B1, KLF6, SAT1, EGR2, ETS2, LITAF, IL1A, CSF1, HBEGF, PNRC1, CCL4, PPP1R15A, SMAD3, NFKBIA, KDM6B, NFKB1, TRIB1, DNAJB4, DDX58, SI…
Stemness	3.17449e-08	5.07919e-08	0.719513	0.748486	2.2501	36	3569, 6262, 345557, 5368, 115701, 146713, 2707, 121551, 9348, 154664, 26298, 25890, 84189, 79827, 133396, 2274, 5655, 5649, 9630, 3909, 374462	IL6, RYR2, PLCXD3, PNOC, ALPK2, RBFOX3, GJB3, BTBD11, NDST3, ABCA13, EHF, ABI3BP, SLITRK6, CLMP, IL31RA, FHL2, KLK10, RELN, GNA14, LAMA3, PTPRQ
GPM	0.000266323	0.000355098	0.498493	0.7289	1.90644	20	4053, 2355, 8829, 4627, 1508, 1601, 3587, 284207, 728, 3678, 3566, 5045, 10184, 64098, 4125, 2242, 79890, 25771, 10312	LTBP2, FOSL2, NRP1, MYH9, CTSB, DAB2, IL10RA, METRNL, C5AR1, ITGA5, IL4R, FURIN, LHFPL2, PARVG, MAN2B1, FES, RIN3, TBC1D22A, TCIRG1
TFs	0.0870968	0.0870968	0.191892	0.663322	1.43272	8	2355, 5966, 1959, 4792, 4790, 2353	FOSL2, REL, EGR2, NFKBIA, NFKB1, FOS

## Sheet: CGGA recurrent 
pathway	pval	padj	log2err	ES	NES	size	leadingEdge	leadingEdge.symbol
Mesenchymal	1.78101e-07	1.09117e-06	0.690132	0.518682	1.7559	85	2350, 301, 645, 1508, 9144, 2359, 6237, 752, 6303, 5329, 2274, 4121, 929, 1522, 272, 4481, 5054, 2212, 2896, 7351, 2014, 1601, 64747, 4053, 2022, 3554, 1075, 51131, 9208, 2769, 5836, 27128, 9473, 4245, 9123, 240, 4627, 920, 23659, 8717, 4125, 23075, 8273, 64866, 435, 6813, 5734, 7057, 7226, 221, 27036, 25816, 79630, 10184, 728, 5045, 8829, 5603, 1296, 6768, 26509, 9871, 6464, 79709, 79887, 7045, …	FOLR2, ANXA1, BLVRB, CTSB, SYNGR2, FPR3, RRAS, FMNL1, SAT1, PLAUR, FHL2, MAN1A1, CD14, CTSZ, AMPD3, MSR1, SERPINE1, FCGR2A, GRN, UCP2, EMP3, DAB2, MFSD1, LTBP2, ENG, IL1R1, CTSC, PHF11, LRRFIP1, GNA15, PYGL, CYTH4, THEMIS2, MGAT1, SLC16A3, ALOX5, MYH9, CD4, PLA2G15, TRADD, MAN2B1, SWAP70, SLC10A3, CDCP1, ASL, STXBP2, PTGER4, THBS1, TRPM2, ALDH3B1, SIGLEC7, TNFAIP8, C1orf54, LHFPL2, C5AR1, FURIN, …
MTC	2.72793e-07	1.09117e-06	0.674963	0.867976	2.27033	12	6155, 4707, 1337, 1329, 28974, 5204, 54344, 116541, 4713, 84266, 64960	RPL27, NDUFB1, COX6A1, COX5B, C19orf53, PFDN5, DPM3, MRPL54, NDUFB7, ALKBH7, MRPS15
TNFA.signlaing	6.2608e-05	0.000166955	0.538434	0.448819	1.52378	90	6347, 6351, 1959, 4814, 7280, 6352, 9516, 6303, 5329, 3383, 1960, 7538, 10365, 23308, 5054, 1026, 3398, 8877, 1844, 3164, 4616, 960, 1843, 23645, 4792, 9592, 23764, 10221, 467, 10957, 9308, 490, 3606, 2683, 5341, 1435, 1316, 8061, 11080, 6446, 127544, 8660, 7262, 2355, 5606, 5734, 2114, 9314, 25816, 3553, 329, 4973, 10950, 7127, 1847, 4794, 55332, 1839, 8767, 5142, 5743, 1846, 602, 150094, 9034, …	CCL2, CCL4, EGR2, NINJ1, TUBB2A, CCL5, LITAF, SAT1, PLAUR, ICAM1, EGR3, ZFP36, KLF2, ICOSLG, SERPINE1, CDKN1A, ID2, SPHK1, DUSP2, NR4A1, GADD45B, CD44, DUSP1, PPP1R15A, NFKBIA, IER2, MAFF, TRIB1, ATF3, PNRC1, CD83, ATP2B1, IL18, B4GALT1, PLEK, CSF1, KLF6, FOSL1, DNAJB4, SGK1, RNF19B, IRS2, PHLDA2, FOSL2, MAP2K3, PTGER4, ETS2, KLF4, TNFAIP8, IL1B, BIRC2, OLR1, BTG3, TNFAIP2, DUSP5, NFKBIE, DRAM1, …
Inf..wound.Res.	0.000984846	0.00196969	0.45506	0.378603	1.3321	158	567, 7114, 6282, 968, 9168, 241, 10581, 6347, 2995, 6275, 1535, 6001, 1520, 752, 5329, 3383, 2274, 1992, 397, 2192, 822, 10365, 6404, 4481, 5054, 5441, 8877, 7351, 11343, 4616, 1843, 8635, 3055, 4792, 9592, 388121, 3554, 23764, 56978, 10964, 51435, 3936, 9308, 27128, 9123, 55647, 3606, 2683, 116151, 8061, 4688, 196383, 6916, 400451, 9056, 146713, 5606, 5734, 2114, 3557, 56944, 221, 9463, 5008, 53…	B2M, TMSB4X, S100A11, CD68, TMSB10, ALOX5AP, IFITM2, CCL2, GYPC, S100A4, CYBA, RGS10, CTSS, FMNL1, PLAUR, ICAM1, FHL2, SERPINB1, ARHGDIB, FBLN1, CAPG, KLF2, SELPLG, MSR1, SERPINE1, POLR2L, SPHK1, UCP2, MGLL, GADD45B, DUSP1, RNASET2, HCK, NFKBIA, IER2, TNFAIP8L3, IL1R1, MAFF, PRDM8, IFI44L, SCARA3, LCP1, CD83, CYTH4, SLC16A3, RAB20, IL18, B4GALT1, FAM210B, FOSL1, NCF2, RILPL2, TBXAS1, FAM174B, SLC…
Inf..Res.	0.0232804	0.0372486	0.352488	0.397842	1.31682	63	1318, 6347, 6352, 3383, 929, 23308, 4481, 5054, 8877, 4792, 1536, 3554, 5029, 2769, 490, 3606, 1435, 1316, 4693, 558, 5734, 9180, 3587, 728, 3553, 4973, 4283, 4891, 10148, 1839, 958, 8767, 5142, 23533, 5724, 1240, 9034, 29933, 3566, 4790, 7096, 8685	SLC31A2, CCL2, CCL5, ICAM1, CD14, ICOSLG, MSR1, SERPINE1, SPHK1, NFKBIA, CYBB, IL1R1, P2RY2, GNA15, ATP2B1, IL18, CSF1, KLF6, NDP, AXL, PTGER4, OSMR, IL10RA, C5AR1, IL1B, OLR1, CXCL9, SLC11A2, EBI3, HBEGF, CD40, RIPK2, PDE4B, PIK3R5, PTAFR, CMKLR1, CCRL2, GPR132, IL4R, NFKB1, TLR1, MARCO
GPM	0.0339493	0.0452657	0.321776	0.500899	1.44384	20	1508, 25771, 1601, 4053, 284207, 4245, 4627, 4125, 2355, 3587, 10184, 728, 5045, 8829, 79890, 2242, 64098	CTSB, TBC1D22A, DAB2, LTBP2, METRNL, MGAT1, MYH9, MAN2B1, FOSL2, IL10RA, LHFPL2, C5AR1, FURIN, NRP1, RIN3, FES, PARVG
TFs	0.201313	0.230072	0.0962406	0.510426	1.22168	8	1959, 4792, 2353, 2355, 9314, 3394	EGR2, NFKBIA, FOS, FOSL2, KLF4, IRF8
Stemness	0.985972	0.985972	0.00599657	0.202744	0.627432	34	2274, 7351, 490, 146713, 5368, 121551, 54863, 79827, 9630, 345557, 3569, 25890	FHL2, UCP2, ATP2B1, RBFOX3, PNOC, BTBD11, TOR4A, CLMP, GNA14, PLCXD3, IL6, ABI3BP

## Sheet: GLASS recurrent
pathway	pval	padj	log2err	ES	NES	size	leadingEdge	leadingEdge.symbol
MTC	2.12878e-05	0.000122356	0.57561	0.840553	1.83811	12	6155, 4707, 1337, 1329, 28974, 54344, 5204, 116541, 64960, 4713, 84266	RPL27, NDUFB1, COX6A1, COX5B, C19orf53, DPM3, PFDN5, MRPL54, MRPS15, NDUFB7, ALKBH7
Mesenchymal	3.05889e-05	0.000122356	0.557332	0.561912	1.50136	85	2350, 301, 645, 2274, 9144, 6237, 1508, 752, 2359, 272, 5329, 1601, 4481, 51131, 7351, 6303, 2212, 3554, 64747, 5054, 2022, 929, 4053, 2769, 1075, 4121, 1522, 9208, 2014, 2896, 79887, 240, 5836, 728, 5603, 27036, 9473, 25816, 8717, 221, 23075, 8273, 920, 6813, 55332, 435, 23659, 79630, 7226, 27128, 9123, 1296, 5734, 1234, 9871, 4245, 4627, 4125, 26509, 27180, 7097, 6768	FOLR2, ANXA1, BLVRB, FHL2, SYNGR2, RRAS, CTSB, FMNL1, FPR3, AMPD3, PLAUR, DAB2, MSR1, PHF11, UCP2, SAT1, FCGR2A, IL1R1, MFSD1, SERPINE1, ENG, CD14, LTBP2, GNA15, CTSC, MAN1A1, CTSZ, LRRFIP1, EMP3, GRN, PLBD1, ALOX5, PYGL, C5AR1, MAPK13, SIGLEC7, THEMIS2, TNFAIP8, TRADD, ALDH3B1, SWAP70, SLC10A3, CD4, STXBP2, DRAM1, ASL, PLA2G15, C1orf54, TRPM2, CYTH4, SLC16A3, COL8A2, PTGER4, CCR5, SEC24D, MGAT1,…
Inf..wound.Res.	0.000153041	0.00040811	0.518848	0.491778	1.35149	158	567, 7114, 6282, 968, 241, 9168, 10581, 2995, 6347, 6275, 6001, 2274, 1992, 10365, 1520, 752, 1535, 6404, 146713, 2192, 397, 5329, 3383, 4481, 388121, 7351, 10964, 3055, 8877, 2683, 3554, 56978, 3606, 822, 5054, 9308, 5441, 11343, 3936, 23764, 116151, 400451, 4792, 1843, 9592, 4616, 55647, 79887, 8635, 4064, 728, 4688, 8061, 112616, 2114, 9056, 5368, 196383, 221, 6916, 51435, 91624, 59084, 5606, …	B2M, TMSB4X, S100A11, CD68, ALOX5AP, TMSB10, IFITM2, GYPC, CCL2, S100A4, RGS10, FHL2, SERPINB1, KLF2, CTSS, FMNL1, CYBA, SELPLG, RBFOX3, FBLN1, ARHGDIB, PLAUR, ICAM1, MSR1, TNFAIP8L3, UCP2, IFI44L, HCK, SPHK1, B4GALT1, IL1R1, PRDM8, IL18, CAPG, SERPINE1, CD83, POLR2L, MGLL, LCP1, MAFF, FAM210B, FAM174B, NFKBIA, DUSP1, IER2, GADD45B, RAB20, PLBD1, RNASET2, CD180, C5AR1, NCF2, FOSL1, CMTM7, ETS2, S…
TNFA.signlaing	0.000865511	0.00173102	0.477271	0.515139	1.38214	90	6347, 6352, 6351, 1959, 4814, 10365, 1960, 23308, 9516, 7280, 5329, 3383, 7538, 1844, 6303, 8877, 2683, 3606, 5054, 1026, 3398, 9308, 10221, 3164, 5341, 11080, 23764, 960, 7262, 4792, 23645, 1843, 9592, 9314, 4616, 8061, 467, 10957, 25816, 2114, 490, 10950, 127544, 5606, 55332, 4929, 3553, 1435, 4973, 8660, 5743, 5734, 3569, 1316, 329, 2355, 6446, 7097, 4794, 9034, 23586, 24145, 150094, 330, 2920	CCL2, CCL5, CCL4, EGR2, NINJ1, KLF2, EGR3, ICOSLG, LITAF, TUBB2A, PLAUR, ICAM1, ZFP36, DUSP2, SAT1, SPHK1, B4GALT1, IL18, SERPINE1, CDKN1A, ID2, CD83, TRIB1, NR4A1, PLEK, DNAJB4, MAFF, CD44, PHLDA2, NFKBIA, PPP1R15A, DUSP1, IER2, KLF4, GADD45B, FOSL1, ATF3, PNRC1, TNFAIP8, ETS2, ATP2B1, BTG3, RNF19B, MAP2K3, DRAM1, NR4A2, IL1B, CSF1, OLR1, IRS2, PTGS2, PTGER4, IL6, KLF6, BIRC2, FOSL2, SGK1, TLR2,…
Inf..Res.	0.048951	0.0783217	0.202072	0.46763	1.22587	63	1318, 6347, 6352, 23308, 3383, 4481, 8877, 3554, 3606, 5054, 929, 1536, 4693, 2769, 4792, 10148, 728, 9180, 490, 1240, 958, 3553, 1435, 4973, 3587, 558, 5734, 3569, 1316, 5029, 5724, 7097, 3586, 9034, 23533, 7096, 4283, 8767, 1839, 114548, 4891	SLC31A2, CCL2, CCL5, ICOSLG, ICAM1, MSR1, SPHK1, IL1R1, IL18, SERPINE1, CD14, CYBB, NDP, GNA15, NFKBIA, EBI3, C5AR1, OSMR, ATP2B1, CMKLR1, CD40, IL1B, CSF1, OLR1, IL10RA, AXL, PTGER4, IL6, KLF6, P2RY2, PTAFR, TLR2, IL10, CCRL2, PIK3R5, TLR1, CXCL9, RIPK2, HBEGF, NLRP3, SLC11A2
GPM	0.13198	0.175973	0.118288	0.517802	1.21788	20	1508, 1601, 25771, 4053, 728, 284207, 3587, 79890, 4245, 4627, 4125, 2355, 10184, 8829, 5045	CTSB, DAB2, TBC1D22A, LTBP2, C5AR1, METRNL, IL10RA, RIN3, MGAT1, MYH9, MAN2B1, FOSL2, LHFPL2, NRP1, FURIN
TFs	0.473684	0.541353	0.0533478	0.497759	1.00144	8	1959, 4792, 9314, 2353, 2355, 3394, 4790, 5966	EGR2, NFKBIA, KLF4, FOS, FOSL2, IRF8, NFKB1, REL
Stemness	0.727182	0.727182	0.0281515	0.360063	0.899864	34	2274, 146713, 7351, 5368, 490, 25890, 3569, 9630, 79827, 54863, 121551, 345557	FHL2, RBFOX3, UCP2, PNOC, ATP2B1, ABI3BP, IL6, GNA14, CLMP, TOR4A, BTBD11, PLCXD3
