# Supplementary material for: Spatial-transcriptomics reveals unique defining molecular features of 5-aminolevulinic acid+ infiltrative tumor cells associated with glioblastoma recurrence and poor survival
Source: Research Square preprint supplement (doi:10.21203/rs.3.rs-780275/v1), 2021-08-04
Supplement: Supplementary file 4 [file Supplementary table 2.xlsx]

## Sheet: Tumor core
Hallmarks enriched in tumor core	pval	padj	NES	size	leadingEdge
HALLMARK_EPITHELIAL_MESENCHYMAL_TRANSITION	1e-10	7.14286e-10	3.2653	147	LOX CD44 PLOD1 TPM4 MMP14 PLOD2 VIM LAMC2 NNMT SERPINE1 COL6A2 VEGFA LRRC15 PTHLH GEM MGP SNAI2 TGFBI COL6A3 IGFBP4 IL32 CDH11 SERPINH1 PCOLCE2 SDC1 SNTB1 CXCL8 IGFBP3 FLNA FSTL3 CALD1 ITGA5 TPM2 SAT1 PLAUR LUM TNC VCAM1 P3H1 IL6 COL1A2 WNT5A FN1 ITGB1 CTHRC1 ADAM12 ENO2 PRRX1 CXCL6 DAB2 SPP1 THBS1 COLGALT1 FUCA1 FBLN5 BMP1 IL15 ANPEP MFAP5 DKK1 ID2 VEGFC MXRA5 FBN2 SLC6A8 LGALS1 COL11A1 COL12A1 …
HALLMARK_INTERFERON_GAMMA_RESPONSE	1e-10	7.14e-10	3.0397	139	ICAM1 UPP1 SOD2 NAMPT ISG20 SECTM1 SLAMF7 B2M PIM1 PTPN2 ST8SIA4 CCL2 IRF4 SOCS3 TNFAIP2 MX2 RIPK2 VCAM1 CASP4 IL6 C1R PML HELZ2 TRIM21 MYD88 IDO1 CCL7 VAMP8 ZBP1 IL15 NOD1 IL7 BATF2 PTPN1 STAT3 NFKB1 PARP14 PLA2G4A OASL IL2RB CXCL9 ITGB7 IFITM3 NMI EPSTI1 APOL6 PLSCR1 TNFSF10 RSAD2 PSME2 IL15RA WARS1 GZMA CD74 HLA-DQA1 NFKBIA IFI35 FPR1 IL4R LATS2 SELP DDX60 SAMD9L IRF7 IFIH1 ISG15 TOR1B LGALS3B…
HALLMARK_HYPOXIA	1e-10	7.14e-10	2.91194	153	P4HA1 PDK1 GBE1 TMEM45A HSPA5 NFIL3 SAP30 LOX PLIN2 MAFF SLC2A3 HMOX1 ERO1A JMJD6 HK2 BNIP3L ATF3 ISG20 P4HA2 STC2 LDHA SERPINE1 VEGFA SIAH2 PPP1R15A ADM KDM3A GYS1 ETS1 TGFBI STC1 ERRFI1 PIM1 ANXA2 FOSL2 RRAGD FAM162A ENO3 IGFBP3 NDRG1 LALBA AKAP12 CA12 EDN2 PLAUR IL6 SCARB1 S100A4 ENO2 GAA PNRC1 INHA
HALLMARK_TNFA_SIGNALING_VIA_NFKB	1e-10	7.14e-10	2.69361	156	ICAM1 BIRC3 NFIL3 MYC SOD2 TNIP1 MAFF SLC2A3 NAMPT CD44 NFKB2 CXCL3 RELB ATF3 TNFRSF9 BCL3 SERPINE1 IL23A VEGFA KDM6B GEM PPP1R15A SPSB1 SPHK1 GFPT2 FOSL2 CCNL1 CCL2 TNFAIP8 FOSL1 DUSP4 KYNU BTG3 MXD1 SOCS3 SAT1 PLAUR TNFAIP2 RIPK2 TNC DRAM1 IL6 BCL2A1 CCL20 KLF10 LIF TRIP10 IL7R CXCL6 B4GALT1 MAP3K8 PNRC1 MCL1 CXCL2 ZC3H12A CSF2 TNIP2 ZBTB10 NFKB1 RELA ID2 TGIF1 CSF1 G0S2 IL15RA TLR2 AREG EFNA1 …
HALLMARK_INTERFERON_ALPHA_RESPONSE	9.74e-09	6.09e-08	2.47587	66	ISG20 B2M LAMP3 TENT5A RIPK2 HELZ2 TRIM21 IL15 IL7 BATF2 PARP14 OASL IFITM3 NMI EPSTI1 IFITM1 CSF1 PLSCR1 RSAD2 PSME2 WARS1 CD74 IFI35 IL4R SAMD9 DDX60 SAMD9L ELF1 IRF7 IFIH1 ISG15 LGALS3BP MX1 IFI44L IFI44 CASP8 PARP12
HALLMARK_INFLAMMATORY_RESPONSE	1e-10	7.14e-10	2.39611	160	ICAM1 MYC NAMPT MMP14 TNFRSF9 SERPINE1 PDPN AHR LAMP3 ADM DCBLD2 CSF3 SPHK1 GNAI3 CCL2 CXCL8 ITGA5 OSMR MXD1 CCR7 PLAUR CD70 MSR1 RIPK2 IL6 ADGRE1 CCL20 SELENOS NOD2 CD14 LIF CD48 IL7R CXCL6 MARCO MET EREG TNFSF15 C5AR1 IL1R1 CCL7 IL15 FZD5 GPC3 NFKB1 IL10 RELA CYBB IL2RB CXCL9 NMI PTGER2 IFITM1 CSF1 TNFSF10 IL15RA TLR2 NMUR1 SLAMF1 TLR1 LYN HRH1 RGS16 GNA15 NFKBIA GP1BA FPR1 RNF144B IL4R PTGER4 …
HALLMARK_E2F_TARGETS	1e-10	7.14e-10	2.39094	140	MYC PRDX4 AK2 LYAR CHEK2 HMGB2 RFC2 WEE1 LBR KPNA2 HMGA1 DDX39A DEK EZH2 PTTG1 JPT1 NUP107 CDKN3 NUP205 CDK1 POLD1 XPO1 HMMR ING3 H2AZ1 MKI67 HMGB3 AURKB PHF5A GINS4 BIRC5 SYNCRIP RAD51AP1 BARD1 PRIM2 LMNB1 POLD3 HELLS USP1 CENPM CDC20 MCM2 MAD2L1 SPC25 LIG1 TK1 CDC25A KIF2C PNN BRCA2 TACC3 CDCA8 POLD2 CCNB2 MELK DEPDC1 NUP153 ESPL1 MCM3 AURKA SUV39H1 SSRP1 MCM6 RBBP7 WDR90 UBE2S ZW10 EIF2S1 ASF1…
HALLMARK_IL6_JAK_STAT3_SIGNALING	2.61e-07	9.33e-07	2.38982	60	HMOX1 CD44 CXCL3 PIM1 PTPN2 PLA2G2A OSMR SOCS3 IL1R2 IL6 CD14 IL2RA MYD88 MAP3K8 CXCL13 TNFRSF1A IL1R1 CCL7 CSF2 IL7 PTPN1 STAT3 CXCL9 IL2RG CSF1 IL15RA TLR2 IL4R BAK1
HALLMARK_UNFOLDED_PROTEIN_RESPONSE	2.43e-07	9.33e-07	2.25048	73	HSPA5 EIF4EBP1 ERO1A PDIA5 ATF3 STC2 NPM1 TARS1 XPOT VEGFA XBP1 EDEM1 CCL2 SHC1 DNAJB9 NABP1 CALR EIF2AK3 CEBPG EIF4A3 SLC30A5 ALDH18A1 TSPYL2 RRP9 RPS14 IGFBP1
HALLMARK_MYC_TARGETS_V1	1.96e-08	9.81e-08	2.14258	134	MYC NPM1 LDHA PRDX4 XPOT RSL1D1 DDX21 IFRD1 ETF1 NOP16 EIF3D RPLP0 DDX18 RPL14 CBX3 UBE2E1 KPNA2 CANX EIF3B SNRPG CDK2 HDAC2 DEK FBL CNBP PABPC1 IMPDH2 SMARCC1 RPS5 SNRPA1 RPS6 XPO1 RRP9 SNRPD2 HNRNPC SSBP1 H2AZ1 SERBP1 SNRPA SYNCRIP EIF2S2 G3BP1 USP1 U2AF1 CAD RPL34 SNRPB2 CDC20 MCM2 MAD2L1 PGK1 HDGF RAD23B SET RPL22 HNRNPA1 RPL6 DHX15 POLD2
HALLMARK_GLYCOLYSIS	1.75e-08	9.72e-08	2.13601	147	P4HA1 HSPA5 SAP30 ERO1A CD44 HK2 MIOX PLOD1 PLOD2 ISG20 P4HA2 STC2 LDHA VEGFA SLC16A3 SPAG4 GYS1 TGFBI STC1 RRAGD SDC1 FAM162A IGFBP3 PYGL GUSB GNPDA1 PMM2 ENO2 EGLN3 COPB2 B4GALT1 MET CHST4 RARS1 GPC3 GMPPA GFPT1 ELF3 DSC2 GALK1 LHX9 TXN AK4 CDK1 HMMR GPC4 TPST1 B4GALT4 PAM VCAN PKM
HALLMARK_IL2_STAT5_SIGNALING	2.37e-08	1.08e-07	2.08491	158	P4HA1 NFIL3 MYC PLIN2 MAFF SLC2A3 CD44 HK2 TNFRSF9 XBP1 AHR MUC1 PIM1 RRAGD ENO3 NDRG1 IRF4 EMP1 MXD1 GALM IL1R2 NRP1 MYO1C TNFRSF8 BATF ICOS SCN9A COL6A1 LIF CDCP1 CD48 CISH IL2RA SPP1 MAP3K8 CCR4 SLC39A8 EOMES SLC1A5 CSF2 GPR65 SERPINB6 RHOH TTC39B IL10 IL2RB IFITM3 PTGER2 TWSG1 CSF1 PLSCR1 TNFSF10 CKAP4 RGS16 NOP2
HALLMARK_MTORC1_SIGNALING	9e-08	3.75e-07	2.06429	140	P4HA1 PDK1 GBE1 HSPA5 NFIL3 SLC2A3 ERO1A NAMPT HK2 PLOD2 TRIB3 RIT1 NUPR1 LDHA XBP1 PPP1R15A NIBAN1 STC1 EDEM1 SERPINH1 CTSC ACTR3 RPN1 IFRD1 ETF1 EGLN3 IGFBP5 CALR SLC1A5 CANX LTA4H TCEA1 DDX39A SDF2L1 TES NUP205 AK4 WARS1 GMPS PNO1 RRP9 MAP2K3
HALLMARK_G2M_CHECKPOINT	2.97e-06	9.91e-06	1.89442	149	SAP30 MYC BCL3 PML KATNA1 LBR KPNA2 HMGA1 DDX39A EZH2 PTTG1 CUL4A JPT1 E2F3 CDKN3 EGF SMARCC1 ABL1 HOXC10 CDK1 XPO1 NOTCH2 HMMR NDC80 MARCKS TRAIP KIF20B KIF11 E2F2 H2AZ1 CCNT1 MKI67 HMGB3 AURKB TTK BIRC5 SYNCRIP BARD1 PRIM2 TENT4A G3BP1 LMNB1 CENPF CDC20 MCM2 HMGN2 MAD2L1 TROAP UBE2C POLQ FBXO5 CDC25A RAD23B KIF15 FANCC KIF2C BRCA2 TACC3 ODF2 CCNB2 PRMT5 SNRPD1 ESPL1 NUSAP1 MCM3 AURKA TOP1 SUV39…
HALLMARK_KRAS_SIGNALING_UP	1.01e-05	3.14e-05	1.86415	144	SLPI BIRC3 ERO1A LY96 PPP1R15A DCBLD2 ETS1 MMP11 GFPT2 IGFBP3 EMP1 PLVAP AKAP12 PLAUR BTC CCL20 NRP1 ADAM8 MMP10 ADAMDEC1 KCNN4 LIF PRRX1 PLEK2 GPNMB IL7R MPZL2 TFPI F13A1 SPP1 FCER1G EREG FUCA1 IL33 CSF2 ID2 RETN CBX8 ZNF639 CTSS IL2RG ENG NR0B2 G0S2
HALLMARK_COMPLEMENT	6.1e-05	0.000169524	1.69994	157	HSPA5 MAFF MMP14 SERPINE1 ITIH1 PIM1 CTSL GNAI3 LGALS3 CTSC KYNU PLAUR GNB4 CASP4 IL6 C1QA C1R CASP5 PFN1 CBLB FN1 ADAM9 C1QC CTSB GATA3 S100A9 GZMB FCER1G CR1 SERPINA1 APOA4 PRSS36 LTA4H PLA2G4A PIK3CA CTSS MMP8 ERAP2 PLSCR1 LYN GZMA CTSH GP1BA DPP4 LTF F5 XPNPEP1 IRF7 KLK1 C4BPB
HALLMARK_P53_PATHWAY	0.000210452	0.000553821	1.6993	133	UPP1 HMOX1 OSGIN1 TRIB3 ATF3 NUPR1 PPP1R15A SPHK1 RRAD ST14 SDC1 FAM162A NDRG1 MXD1 SAT1 S100A10 DRAM1 STEAP3 LIF S100A4 VDR SP1 IRAK1 FUCA1 SLC19A2 VAMP8 MKNK2 SLC3A2 TM4SF1 RPL36 ITGB4 DNTTIP2 RGS16 TSPYL2 HDAC3 PLXNB2 F2R EPS8L2 BAK1
HALLMARK_ANGIOGENESIS	0.014202	0.0273116	1.66981	28	VEGFA STC1 LUM NRP1 S100A4 CXCL6 SPP1 FGFR1 POSTN VAV2 VCAN
HALLMARK_APOPTOSIS	0.000492237	0.00123059	1.65868	119	BIRC3 SOD2 HMOX1 CD44 BNIP3L ATF3 ISG20 LGALS3 BCAP31 EMP1 BTG3 SAT1 ANXA1 LUM PRF1 CASP4 IL6 HMGB2 CD14 ENO2 ETF1 WEE1 EREG MCL1 HSPB1 CDK2 RELA IFITM3 FASLG TSPO TNFSF10 CD2 GNA15 F2R DAP SLC20A1 BMF LMNA
HALLMARK_MYC_TARGETS_V2	0.0103601	0.0207202	1.63265	37	MYC HK2 NPM1 NOP16 DDX18 CBX3 BYSL MAP3K6 NOP2 RRP9 TFB2M
HALLMARK_APICAL_JUNCTION	0.00310289	0.00674541	1.47039	146	ICAM1 DMP1 LAMC2 VCL CD276 TGFBI CDH11 SHC1 ACTG2 VCAM1 NECTIN2 PFN1 NECTIN4 CNN2 CD209 ADAM9 ITGB1 CLDN19 MDK MPZL2 CLDN14 PDZD3 CLDN15 B4GALT1 MPZL1 RSU1 BMP1 DSC3 VASP RRAS ITGB4 RAC2 COL9A1 ACTN1 ACTB
HALLMARK_DNA_REPAIR	0.00012568	0.000698221	1.76351	94	BCAP31 SDCBP TAF12 RALA DCTN4 XPC AGO4 POLD3 SRSF6 NFX1 GTF2H1 RPA2 RNMT TAF13 RAD52 SF3A3 SSRP1 ERCC8 RFC5 CMPK2 POLR2D GTF2B CLP1 NUDT21 NELFCD RFC3 DGUOK NELFB PRIM1 UPF3B LIG1 AAAS GTF3C5 IMPDH2 TMED2 ERCC4 POLB POLR2K SUPT5H TSG101 NCBP2 POLD1 NUDT9 TARBP2 AK3 GTF2F1 ERCC3 GMPR2 EDF1 VPS37B POLA2 POLR2H DUT POLL SNAPC4 ARL6IP1 DDB2 POLR2A ELL POLR2G POLE4
HALLMARK_PROTEIN_SECRETION	0.00183219	0.00832813	1.62515	67	BNIP3 SNX2 BET1 STX16 ZW10 USO1 RAB22A AP3S1 PPT1 TMX1 ANP32E COG2 VPS4B GOLGA4 LMAN1 VAMP3 COPB2 SNAP23 MON2 VPS45 STX12 YKT6 TMED2 KIF1B AP3B1 ERGIC3 TSG101 VAMP4 TMED10 PAM STAM STX7 LAMP2 DST ARFIP1 RPS6KA3 GALC SCRN1 ARFGEF2 CLCN3 RAB9A CLN5 SSPN ARFGAP3
HALLMARK_MITOTIC_SPINDLE	0.00702446	0.0247085	1.45782	145	FLNA SASS6 PCM1 LATS1 CNTRL CEP57 NCK1 CDK5RAP2 WASL RASA2 ALS2 ALMS1 KATNA1 ROCK1 NIN CEP250 RFC1 SOS1 LRPPRC SMC3 CDC42 TUBGCP3 TSC1 WASF2 ARHGAP5 ABL1 INCENP CLIP2 HOOK3 RALBP1 TLK1 ARF6 CD2AP GEMIN4 STAU1 PDLIM5 BCL2L11 CNTROB CENPJ CEP72 KNTC1 FBXO5 BRCA2 KIF15 STK38L RAB3GAP1 CEP192 RICTOR KIF5B EPB41L2 KIF1B NOTCH2 NET1 RHOT2 KIF3B YWHAE ARHGEF2 PCNT CCDC88A MAPRE1 ECT2 KIF2C RACGAP1 DST T…
HALLMARK_HEME_METABOLISM	0.0102826	0.0302429	1.43457	138	SLC6A8 BNIP3L SDCBP HBD MKRN1 TCEA1 RIOK3 NR3C1 KDM7A NEK7 CAT NARF KEL MPP1 TFRC DCAF10 FOXO3 GAPVD1 SLC4A1 TFDP2 ALAS2 SLC11A2 USP15 HBB UBAC1 EPB42 HBBP1 HDGF HBZ BPGM XPO7 TRAK2 GMPS EZH1 ADIPOR1 TNRC6B BLVRA MBOAT2 TOP1 FOXJ2 SLC30A1 SLC25A38 HBQ1 DCUN1D1 RANBP10 IGSF3 E2F2 BACH1 HMBS

## Sheet: Tumor rim
Hallmarks enriched in tumor rim	pval	padj	NES	size	leadingEdge
HALLMARK_EPITHELIAL_MESENCHYMAL_TRANSITION	1e-10	7.14286e-10	3.70424	147	MGP IGFBP4 TGFBI COL6A3 IL32 NNMT FN1 ITGA5 VIM CXCL8 MMP14 FSTL3 CD44 SERPINE1 TPM4 LOX LAMC2 GEM PLAUR COL1A2 SNAI2 LRRC15 SERPINH1 SAT1 CXCL6 LUM VEGFA MYL9 PLOD2 COL6A2 CTHRC1 SPP1 IL6 IGFBP3 SDC1 TPM2 ADAM12 PCOLCE2 TNC ENO2 PLOD1 DAB2 SNTB1 CDH11 LGALS1 ITGB1 MFAP5 COL4A1 VCAM1 IL15 THBS1 MXRA5 ANPEP PTHLH CALD1 FBLN5 DKK1 NID2 WNT5A GADD45B COL12A1 FLNA P3H1 COLGALT1 CAPG AREG OXTR DCN BMP…
HALLMARK_HYPOXIA	1e-10	7.14286e-10	3.03416	153	GBE1 PLIN2 STC1 P4HA2 P4HA1 MAFF TGFBI HK2 PDK1 HMOX1 HSPA5 NFIL3 TMEM45A ISG20 ATF3 ERO1A SERPINE1 ADM LOX SLC2A3 FOSL2 PIM1 PLAUR GPC3 LALBA VEGFA ANXA2 IL6 PPP1R15A IGFBP3 STC2 JMJD6 LDHA ENO2 NOCT ENO3 AKAP12 ETS1 TES IGFBP1 FAM162A CA12 GLRX EFNA1 SIAH2 NDRG1 GYS1 PGF ERRFI1 S100A4 EDN2 SAP30 CAVIN3 CXCR4 GAA FBP1 RRAGD
HALLMARK_TNFA_SIGNALING_VIA_NFKB	1e-10	7.14286e-10	3.41653	156	ICAM1 NFKB2 NAMPT RELB BIRC3 CCL2 TNFRSF9 MAFF SOD2 SPHK1 NFIL3 CCL20 CXCL3 SPSB1 ATF3 CD44 SERPINE1 BCL3 SLC2A3 IL23A MYC TNIP1 FOSL2 GEM PLAUR SOCS3 KYNU FOSL1 TNFAIP2 SAT1 CXCL6 BCL2A1 VEGFA TNFAIP8 IL6 PPP1R15A IL15RA TNC MAP3K8 B4GALT1 CXCL2 ZC3H12A LIF DRAM1 MXD1 EFNA1 IL7R KDM6B G0S2 MAP2K3 GFPT2 DUSP4 KLF10 TRIP10 CSF2 GADD45B HBEGF BTG3 RCAN1 TNIP2 AREG SLC2A6 NFKBIA CSF1 TLR2 NFKBIE MCL…
HALLMARK_INTERFERON_ALPHA_RESPONSE	0.00148316	0.00353134	1.7745	66	ISG20 LAMP3 B2M WARS1 TENT5A IL15 TRIM21 IL4R HELZ2 BATF2 CSF1 OASL LGALS3BP CCRL2 CD74 PSME2 RIPK2 IFITM3 IL7 NMI IFI35
HALLMARK_INFLAMMATORY_RESPONSE	1e-10	7.14286e-10	3.0687	160	ICAM1 NAMPT CCL2 TNFRSF9 SPHK1 ITGA5 CCL20 CXCL8 MMP14 SERPINE1 ADM IL1R1 AHR MYC PLAUR GPC3 LAMP3 CD70 PDPN ADGRE1 CXCL6 DCBLD2 CCL7 BDKRB1 CD14 IL6 PTGIR MARCO MSR1 IL15RA C5AR1 NOD2 ICAM4 NMUR1 LIF RGS16 EREG IL15 MXD1 CSF3 IL7R SLAMF1 OSMR IL2RB PTGER2 TNFSF15 CD40 IL10 CCR7 IL4R FPR1 CD48 CLEC5A OSM HRH1 HBEGF SELENOS MET GNA15 NFKBIA CSF1 FZD5 TLR2 LCK CCRL2 IL1A IRAK2 KLF6 RIPK2 NMI LYN RG…
HALLMARK_IL6_JAK_STAT3_SIGNALING	1.54559e-08	7.72793e-08	2.61297	60	HMOX1 CXCL3 CD44 IL1R2 IL1R1 PLA2G2A PIM1 SOCS3 CCL7 CD14 IL6 IL2RA IL15RA MAP3K8 OSMR TNFRSF1A PTPN2 CXCL13 IL4R IL2RG CSF2 CSF1 TLR2 IL7 STAT3 MYD88 TNFRSF21 TNFRSF12A BAK1 CXCL1 PF4 IL1B
HALLMARK_UNFOLDED_PROTEIN_RESPONSE	0.000102356	0.000269357	1.98322	73	CCL2 EIF4EBP1 HSPA5 ATF3 PDIA5 ERO1A XBP1 SHC1 VEGFA NABP1 STC2 TSPYL2 IGFBP1 EDEM1 TARS1 ALDH18A1 DNAJB9 CALR NPM1 BAG3 XPOT
HALLMARK_GLYCOLYSIS	9.28368e-08	3.8682e-07	1.97908	147	STC1 P4HA2 P4HA1 TGFBI HK2 MIOX HSPA5 ISG20 CD44 ERO1A SLC16A3 SPAG4 GPC3 VEGFA PLOD2 IGFBP3 SDC1 STC2 LDHA ENO2 PLOD1 B4GALT1 CHST4 FAM162A GLRX PYGL GYS1 B3GNT3 TPST1 ELF3 SAP30 CXCR4 PMM2 RRAGD MET EGLN3 DCN GUSB DSC2 TXN GALK1 LHX9 GMPPA GPC4 CDK1 DDIT4 HMMR ADORA2B
HALLMARK_IL2_STAT5_SIGNALING	1e-10	7.14286e-10	2.41265	158	TNFRSF9 PLIN2 P4HA1 MAFF HK2 NFIL3 CD44 XBP1 IL1R2 AHR SLC2A3 MYC PIM1 MUC1 TNFSF11 SLC39A8 NRP1 SPP1 BATF EMP1 MYO1C IL2RA ENO3 MAP3K8 CDCP1 TNFRSF4 RHOH LIF RGS16 CISH MXD1 SLC1A5 IL2RB NDRG1 IRF4 PTGER2 IL10 SERPINB6 TNFRSF8 IL4R CCR4 CTSZ EOMES CD48 COL6A1 CSF2 SELP GADD45B CAPG GALM RRAGD GPR65 CSF1 CST7 FAH ICOS
HALLMARK_MTORC1_SIGNALING	4.62306e-07	1.7781e-06	1.95196	140	GBE1 NAMPT STC1 P4HA1 HK2 PDK1 NUPR1 HSPA5 NFIL3 TRIB3 ERO1A XBP1 NIBAN1 SLC2A3 SERPINH1 CTSC WARS1 PLOD2 PPP1R15A LDHA SDF2L1 TES GLRX MAP2K3 SLC1A5 EDEM1 RPN1
HALLMARK_KRAS_SIGNALING_UP	1.77834e-10	1.11147e-09	2.27751	144	BIRC3 LY96 MMP10 SLPI PLVAP CCL20 ERO1A PLAUR MMP11 PLEK2 CFHR2 ADAM8 DCBLD2 NRP1 ENG RETN SPP1 MPZL2 PPP1R15A IGFBP3 EMP1 MMP9 KCNN4 AKAP12 FCER1G ETS1 LIF RGS16 EREG BTC GPNMB F13A1 GLRX IL7R G0S2 GFPT2 IL2RG MALL CSF2 ADAMDEC1 HBEGF CXCR4
HALLMARK_COMPLEMENT	5.42038e-08	2.46381e-07	1.92615	157	MAFF FN1 HSPA5 CTSL CTSB MMP14 SERPINE1 ITIH1 S100A9 PIM1 PLAUR GZMB KYNU C1QA MMP8 CTSC PFN1 C1R GATA3 IL6 CASP5 APOA4 FCER1G LTF LGALS3 CASP4 C1QC SERPINA1 PRSS36 CR1 GNB4 SERPING1 CTSH C4BPB MMP13 LCK LGMN GZMA DPP4 APOC1 ADAM9 CBLB PRKCD C3 CTSS LYN CXCL1 F3 CASP7 GNAI3 GP9 DUSP5 XPNPEP1 SERPINC1 ERAP2
HALLMARK_P53_PATHWAY	1.8329e-05	5.72782e-05	1.7882	133	UPP1 HMOX1 NUPR1 OSGIN1 SPHK1 ATF3 RRAD TRIB3 ST14 SAT1 PPP1R15A SDC1 VDR VAMP8 TM4SF1 TSPYL2 S100A10 LIF RGS16 FAM162A DRAM1 MXD1 ITGB4 NDRG1 S100A4 STEAP3 HBEGF TCN2 IRAK1 IL1A FUCA1 F2R SLC3A2 MKNK2 PLXNB2 DDIT4 SLC19A2 BAK1 GADD45A EPS8L2
HALLMARK_ANGIOGENESIS	4.26346e-05	0.000125396	2.28123	28	STC1 CXCL6 LUM VEGFA NRP1 SPP1 S100A4 FGFR1 LPL TNFRSF21 PF4 POSTN VAV2
HALLMARK_APOPTOSIS	7.09571e-05	0.000197103	1.74612	119	BIRC3 HMOX1 SOD2 ISG20 ATF3 CD44 SAT1 LUM CD14 IL6 EMP1 ENO2 PRF1 IGFBP6 LGALS3 CASP4 EREG HSPB1 TSPO GADD45B ANXA1 BTG3 GNA15 DCN MCL1 IL1A AVPR1A BNIP3L HMGB2 F2R IFITM3 CDK2 CD2 TNFRSF12A GADD45A CASP7 WEE1 GPX3 LMNA RELA IL1B CDKN1A HGF PDGFRB
HALLMARK_APICAL_JUNCTION	3.05006e-06	1.04275e-05	1.81974	146	ICAM1 TGFBI DMP1 ACTG2 LAMC2 SHC1 NECTIN4 VCL MYL9 PFN1 CD276 NECTIN2 MPZL2 MDK ACTN1 RSU1 MMP9 CLDN14 B4GALT1 VASP CDH11 RRAS ITGB1 ICAM4 CNN2 VCAM1 ITGB4 ACTB RAC2 DSC3 MPZL1 CDH3 CD209 BMP1 MYH9 ADAM9 PDZD3 TSPAN4 NEXN
HALLMARK_KRAS_SIGNALING_DN	1.61102e-05	0.000134252	1.73436	148	NUDT11 NPHS1 IL12B KRT1 PAX4 SMPX GPRC5C HSD11B2 TSHB IL5 KRT13 SLC5A5 SGK1 CHST2 EDN1 AMBN CALCB CPB1 SLC30A3 ITIH3 DTNB CLDN16 NOS1 NTF3 CLSTN3 KLK7 UGT2B17 ABCG4 EFHD1 BTG2 PROP1 MFSD6 SERPINA10 RYR2 ALOX12B PKP1 AKR1B10 KRT4 GDNF FGF22 KCND1 SLC29A3 SCN10A BRDT SPTBN2 KCNN1 TEX15 LGALS7 SLC6A3 GPR3 SLC6A14 LYPD3
HALLMARK_XENOBIOTIC_METABOLISM	0.00591134	0.0128507	1.42813	135	UPP1 IGFBP4 HMOX1 PROS1 SERPINE1 HSD17B2 IL1R1 ITIH1 GCKR KYNU CES1 IGFBP1 BLVRB SLC1A5 UGDH TNFRSF1A AOX1 TPST1 FMO1 XDH PTGES SSR3 ESR1 ENPEP FBP1 CYP1A2 SERPINA6

## Sheet: Invasive region
Hallmarks in invasive region	pval	padj	NES	size	leadingEdge
HALLMARK_KRAS_SIGNALING_DN	0.00275752	0.00656552	1.52601	148	NUDT11 MFSD6 IL12B DTNB EFHD1 SGK1 FGF22 AMBN FGFR3 EDN1 NPHS1 KLK7 PNMT ZBTB16 SLC29A3 CELSR2 BTG2 SLC38A3 SLC25A23 KMT2D SLC30A3 NOS1 SMPX KCNN1 GPRC5C CAPN9 RYR2 ABCG4 SPTBN2 CPEB3 CLDN16 SLC5A5 KRT1 TEX15 CLSTN3 COL2A1 PRODH TSHB PAX4 NR4A2 CPA2 PDE6B TENM2 CLPS RYR1 BMPR1B VPS50 ALOX12B UGT2B17 KCNQ2 PROP1 NTF3 MYO15A ATP4A PKP1 KRT5 HNF1A LYPD3 IL5 PTPRJ GAMT SERPINA10
HALLMARK_OXIDATIVE_PHOSPHORYLATION	1.13e-05	3.33e-05	1.81546	133	PDK4 ISCU OAT IDH3A MGST3 FH ACADSB ATP5MC3 MPC1 CYCS MFN2 SLC25A12 ATP6V1H SLC25A4 GOT2 MRPL35 NDUFA4 CPT1A ALAS1 ATP6V1E1 PDHB MTX2 RETSAT SURF1 OGDH COX6A1 COX5A SLC25A11 COX4I1 ATP6V0B COX5B ACADM FXN GPX4 NDUFV1 NDUFS7 NDUFB1 SDHA PDP1 ATP6AP1 NDUFS1 MTRF1 ATP6V1C1 ATP5F1A NDUFA5 UQCRFS1 LRPPRC ATP5F1D NDUFA8 MAOB NDUFS2 HSD17B10 IDH2 SUCLG1 MRPS11 UQCRC2 NDUFAB1 ACAT1 ATP6V1D UQCR10 VDAC3 C…
HALLMARK_MITOTIC_SPINDLE	0.000255007	0.000637517	1.6442	145	MID1IP1 CCDC88A FGD4 APC KIF1B PCM1 CDC42BPA NET1 SHROOM1 PCNT DOCK4 RAPGEF5 ARHGEF2 ARL8A FGD6 TIAM1 EPB41L2 BIN1 KIF5B CEP72 PREX1 TUBGCP3 DYNC1H1 TLK1 MAP3K11 SORBS2 NCK2 PAFAH1B1 ARHGEF7 MAP1S YWHAE LRPPRC ARHGEF12 ATG4B CDC42EP2 DST RAB3GAP1 KIF3C TSC1 KIF3B TUBGCP6 INCENP ALS2 KIFAP3 NIN SOS1 STAU1 LATS1 WASL ARHGAP5 SHROOM2 RHOT2 PDLIM5 TUBGCP5 RALBP1 WASF2 RFC1 PKD2 KATNB1 RICTOR CNTRL WA…
HALLMARK_PROTEIN_SECRETION	0.00116213	0.0220804	1.54201	67	SCRN1 KIF1B CLCN3 SSPN STX16 MON2 DNM1L RAB22A STX12 DST USO1 VPS4B GBF1 AP2B1 COG2 RAB9A SGMS1 OCRL ZW10 LAMP2 ATP6V1H NAPG SCAMP1 ARFIP1 STAM GALC YKT6 STX7 SOD1 COPB2 TMED10 ICA1 SNX2 TSG101 AP2M1 ANP32E YIPF6 CLN5 ARFGEF2

## Sheet: 5ALA-
Hallmarks enriched in 5ALA-	pval	padj	NES	size	leadingEdge
HALLMARK_E2F_TARGETS	9.1348e-06	0.000114185	1.91136	140	PHF5A CDKN3 RAN MYBL2 RFC2 RPA2 CCNB2 RANBP1 AURKA PTTG1 UBE2S AURKB RNASEH2A CCNE1 CDKN2C SPC24 SSRP1 LBR WEE1 MAD2L1 XPO1 EZH2 BARD1 PRDX4 CENPM DUT POLD3 RRM2 USP1 PRIM2 MCM3 ING3 MCM5 UBE2T CDCA8 ATAD2 HMGB2 RBBP7 DEK CDC25A PLK4 RAD51AP1 CTCF PMS2 LMNB1 PRPS1 ASF1B GINS4 GINS1 H2AZ1 BRCA2 CDC20 CSE1L ORC6 PA2G4 TRIP13 NOLC1 BIRC5 JPT1 POLD2 SLBP MRE11 TK1 CDK1 KPNA2 HMGA1
HALLMARK_MYC_TARGETS_V1	6.32155e-10	1.58039e-08	2.3434	134	CCT5 RAN SRPK1 NHP2 HPRT1 ACP1 RANBP1 NPM1 SRM HDGF EIF2S2 SNRPA1 PPIA RPLP0 NOP16 PSMA7 ERH VDAC1 CCT7 UBE2E1 MAD2L1 XPO1 TRIM28 RSL1D1 PRDX4 DUT SNRPG SERBP1 FBL RUVBL2 PTGES3 USP1 YWHAE SNRPD1 UBE2L3 PSMD14 RPL14 GLO1 MCM5 COX5A RPL34 RPL22 RNPS1 YWHAQ CDK2 SSBP1 RRP9 DEK RPS6 HNRNPC BUB3 CLNS1A HDDC2 NDUFAB1 H2AZ1 VDAC3 CDC20 PA2G4 TFDP1 CYC1 PSMA4 NOLC1 POLD2 APEX1 MRPL23 KPNA2 PWP1 RPL6 CBX…
HALLMARK_G2M_CHECKPOINT	0.00457603	0.0326859	1.54962	149	CDKN3 MYBL2 HMGN2 RPA2 H2AZ2 CCNB2 AURKA PTTG1 UBE2S AURKB CDKN2C TPX2 LBR EGF MAD2L1 XPO1 EZH2 BARD1 UBE2C MTF2 CENPA CDC6 ORC5 GINS2 PRIM2 SNRPD1 TRAIP MCM3 MCM5 DTYMK SLC7A1 FBXO5 CDC25A PLK4 MEIS1 NDC80 CASP8AP2 CTCF LMNB1 BUB3 NUSAP1 KMT5A H2AZ1 BRCA2 CCND1 E2F2 CDC20 ORC6 TFDP1 NOLC1 BIRC5 JPT1 LIG3 CDK1 KPNA2 HMGA1 RBL1 KNL1 TTK NEK2 E2F4 EWSR1 RPS6KA5 HNRNPD RAD23B MCM6
HALLMARK_MYC_TARGETS_V2	0.00530969	0.0331856	1.7776	37	NPM1 SRM PRMT3 NOP16 MAP3K6 SLC29A2 LAS1L MCM5 FARSA PUS1 RRP9 PLK4 TFB2M PA2G4 IMP4 NOLC1 PES1 CBX3
HALLMARK_DNA_REPAIR	0.00242439	0.0202033	1.64462	94	NELFB BCAM RFC2 RPA2 CLP1 HPRT1 CDA AK3 SSRP1 USP11 DGUOK TAF13 DUT POLD3 RFC5 TSG101 POLB SF3A3 ERCC4 ADA UPF3B GTF2H1 TAF12 ERCC8 GTF2A2 VPS37B ALYREF ZWINT NELFCD BCAP31 SNAPC4 GMPR2 GUK1 RAD51
HALLMARK_OXIDATIVE_PHOSPHORYLATION	1.56812e-05	0.000156812	1.91987	133	SUCLG1 NDUFA5 MTX2 ATP6V1D MRPL11 ISCU ATP5F1C LDHB MGST3 ACADSB NDUFA9 COX7B NDUFS4 VDAC1 TIMM10 CS CYB5A ATP6V1G1 BDH2 MFN2 MRPL35 COX6C ECI1 COX5A NDUFB3 ATP6AP1 COX7A2L SDHA NDUFV2 NDUFA8 UQCRC2 NDUFS2 SDHB UQCRH PDHB ATP5F1A MRPS11 ABCB7 NDUFB1 NDUFAB1 MRPL15 IDH1 COX7A2 VDAC3 NDUFA4 COX8A CYC1 COX6A1 HCCS TIMM50 TOMM22 UQCRFS1 SLC25A4 COX5B CASP7 VDAC2 IDH2 MRPS22 SDHD OAT UQCR10 PRDX3 MRPS…
HALLMARK_PROTEIN_SECRETION	1.75585e-05	0.000807692	1.73565	67	SSPN YKT6 USO1 SCRN1 TMED10 RAB22A COPB2 CLCN3 ZW10 DNM1L LMAN1 AP2B1 KIF1B NAPG YIPF6 COG2 ARFGEF2 VAMP3 AP3B1 STX16 RPS6KA3 GALC BET1 SCAMP1 SNX2 STX7 MON2 AP2M1 VPS4B GBF1 BNIP3 ANP32E RAB9A ATP6V1H OCRL LAMP2 DST STX12 PAM ARFGAP3 TMED2 ICA1 CLN5 VAMP4 MAPK1 ARCN1 ERGIC3 RAB2A SH3GL2

## Sheet: 5ALA+
Hallmarks enriched in 5ALA+	pval	padj	NES	size	leadingEdge
HALLMARK_TNFA_SIGNALING_VIA_NFKB	1e-10	5e-09	2.65604	156	NR4A3 TRIB1 NR4A2 IL1B IL1A CD83 IL18 REL HBEGF ICOSLG NFKBIA B4GALT1 NR4A1 CCL4 NINJ1 KLF6 MAFF EGR3 CCNL1 OLR1 LITAF KLF2 FOSL1 NFKB2 KLF4 SPHK1 RNF19B SIK1 SPSB1 NFKBIE CXCL3 PDE4B CCL2 IL6 ATP2B1 PLEK PANX1 SAT1 ETS2 BCL3 FOSL2 PNRC1 CSF1 NFKB1 MAP2K3 DUSP5 BTG3 PTGER4 CCL5 SGK1 TNFAIP8 CXCL2 ICAM1 EGR2 IRS2 CCRL2 TLR2 LIF ATF3 DUSP1 TNFAIP2 PPP1R15A CD44 CSF2 SERPINE1 CCL20 MAP3K8 DDX58 KDM6…
HALLMARK_INFLAMMATORY_RESPONSE	6.54608e-06	0.000109101	1.96376	160	IL1B IL1A AXL NLRP3 IL18 HBEGF ICOSLG NFKBIA MSR1 IL10 CD14 KLF6 IL4R OLR1 IL10RA TACR3 CMKLR1 SPHK1 CCL22 PDE4B CCL2 IRAK2 IL6 P2RY2 ATP2B1 CYBB CCR7 ICAM4 PIK3R5 SCARF1 MARCO BDKRB1 NMUR1 MEP1A IL1R1 CXCL9 CSF1 NOD2 OSMR NFKB1 CXCL8 NDP SLC11A2 GPR132 MET PTGER4 CCL5 ICAM1 CSF3 TLR1 CCRL2 TLR2 LIF GNA15 EBI3 C5AR1 PTAFR SERPINE1 CCL20 SLC31A2 LDLR CD40 ITGA5 RIPK2

## Sheet: Hypoxia
Genes	Rank
ADM	0.530143
AKAP12	0.439086
ANXA2	0.493477
ATF3	0.605612
BNIP3L	0.614997
CA12	0.43634
EDN2	0.428312
ENO2	0.366988
ENO3	0.461174
ERO1A	0.674506
ERRFI1	0.511551
ETS1	0.520375
FAM162A	0.46609
FOSL2	0.491839
GAA	0.335818
GBE1	0.825211
GYS1	0.520654
HK2	0.660827
HMOX1	0.686914
HSPA5	0.803799
IGFBP3	0.456256
IL6	0.405214
INHA	0.326185
ISG20	0.60402
JMJD6	0.661898
KDM3A	0.522335
LALBA	0.45019
LDHA	0.576896
LOX	0.720573
MAFF	0.689124
NDRG1	0.455921
NFIL3	0.764074
P4HA1	0.915206
P4HA2	0.596915
PDK1	0.84667
PIM1	0.502179
PLAUR	0.422366
PLIN2	0.689224
PNRC1	0.330841
PPP1R15A	0.539864
RRAGD	0.481442
S100A4	0.369796
SAP30	0.757577
SCARB1	0.382439
SERPINE1	0.574685
SIAH2	0.557235
SLC2A3	0.687565
STC1	0.513292
STC2	0.586878
TGFBI	0.519416
TMEM45A	0.812905
VEGFA	0.558666

## Sheet: Glycolysis
Genes	Rank
AK4	0.246658
B4GALT1	0.342933
B4GALT4	0.209888
CD44	0.66612
CDK1	0.239415
CHST4	0.328596
COPB2	0.3442
DSC2	0.266026
EGLN3	0.344434
ELF3	0.268519
ENO2	0.366988
ERO1A	0.674506
FAM162A	0.46609
GALK1	0.264132
GFPT1	0.268677
GMPPA	0.281706
GNPDA1	0.399644
GPC3	0.297291
GPC4	0.215597
GUSB	0.411784
GYS1	0.520654
HK2	0.660827
HMMR	0.22835
HSPA5	0.803799
IGFBP3	0.456256
ISG20	0.60402
LDHA	0.576896
LHX9	0.258597
MET	0.342022
MIOX	0.654648
P4HA1	0.915206
P4HA2	0.596915
PAM	0.20824
PKM	0.204236
PLOD1	0.654412
PLOD2	0.636616
PMM2	0.386834
PYGL	0.425084
RARS1	0.321338
RRAGD	0.481442
SAP30	0.757577
SDC1	0.474514
SLC16A3	0.531157
SPAG4	0.527238
STC1	0.513292
STC2	0.586878
TGFBI	0.519416
TPST1	0.215509
TXN	0.256378
VCAN	0.208163
VEGFA	0.558666

## Sheet: Inflammatory response
Genes	Rank
ATP2B1	0.34669
AXL	0.565442
BDKRB1	0.315046
C5AR1	0.223134
CCL2	0.359615
CCL20	0.209075
CCL22	0.363914
CCL5	0.281503
CCR7	0.338455
CCRL2	0.256784
CD14	0.459165
CD40	0.202223
CMKLR1	0.391474
CSF1	0.308277
CSF3	0.261725
CXCL8	0.300489
CXCL9	0.309683
CYBB	0.340838
EBI3	0.226492
GNA15	0.236989
GPR132	0.288509
HBEGF	0.507983
ICAM1	0.26737
ICAM4	0.33223
ICOSLG	0.50014
IL10	0.469433
IL10RA	0.401888
IL18	0.514024
IL1A	0.588556
IL1B	0.595927
IL1R1	0.312876
IL4R	0.442617
IL6	0.354724
IRAK2	0.359549
ITGA5	0.198499
KLF6	0.457801
LDLR	0.20306
LIF	0.245456
MARCO	0.318149
MEP1A	0.314669
MET	0.286924
MSR1	0.479656
NDP	0.299704
NFKB1	0.302151
NFKBIA	0.488792
NLRP3	0.537672
NMUR1	0.314805
NOD2	0.30584
OLR1	0.405247
OSMR	0.302657
P2RY2	0.349584
PDE4B	0.362382
PIK3R5	0.324559
PTAFR	0.21999
PTGER4	0.286292
RIPK2	0.19554
SCARF1	0.319757
SERPINE1	0.210002
SLC11A2	0.291015
SLC31A2	0.20413
SPHK1	0.387121
TACR3	0.39152
TLR1	0.256843
TLR2	0.254709

## Sheet: TNFA signaling via NFKB
Genes	Rank
ATF3	0.23742
ATP2B1	0.34669
B4GALT1	0.484838
B4GALT5	0.123586
BCL3	0.320449
BIRC2	0.150454
BIRC3	0.156493
BTG3	0.294121
CCL2	0.359615
CCL20	0.209075
CCL4	0.473872
CCL5	0.281503
CCNL1	0.412136
CCRL2	0.256784
CD44	0.226
CD83	0.581129
CDKN1A	0.133912
CSF1	0.308277
CSF2	0.221212
CXCL2	0.270131
CXCL3	0.364577
DDX58	0.204692
DNAJB4	0.153072
DRAM1	0.132191
DUSP1	0.22964
DUSP2	0.190377
DUSP4	0.129265
DUSP5	0.297475
EGR2	0.267081
EGR3	0.440058
ETS2	0.320516
FOSL1	0.39376
FOSL2	0.314252
GADD45B	0.15605
HBEGF	0.507983
ICAM1	0.26737
ICOSLG	0.50014
ID2	0.16041
IER2	0.200885
IL18	0.514024
IL1A	0.588556
IL1B	0.595927
IL6	0.354724
IRS2	0.257857
KDM6B	0.204499
KLF2	0.397597
KLF4	0.387435
KLF6	0.457801
LDLR	0.20306
LIF	0.245456
LITAF	0.400768
MAFF	0.455539
MAP2K3	0.299075
MAP3K8	0.206685
NFKB1	0.302151
NFKB2	0.391535
NFKBIA	0.488792
NFKBIE	0.366461
NINJ1	0.459913
NR4A1	0.478814
NR4A2	0.684688
NR4A3	0.704611
OLR1	0.405247
PANX1	0.336755
PDE4B	0.362382
PDLIM5	0.181103
PER1	0.169267
PHLDA2	0.149457
PLAUR	0.138427
PLEK	0.345297
PNRC1	0.312353
PPP1R15A	0.229018
PTGER4	0.286292
PTGS2	0.202958
REL	0.508968
RIPK2	0.19554
RNF19B	0.386636
SAT1	0.32474
SERPINE1	0.210002
SGK1	0.273788
SIK1	0.382412
SMAD3	0.127133
SOCS3	0.122359
SPHK1	0.387121
SPSB1	0.378372
TLR2	0.254709
TNFAIP2	0.22902
TNFAIP8	0.271554
TRIB1	0.691819
TUBB2A	0.190184
ZFP36	0.135799
