# Supplementary material for: Spatial-transcriptomics reveals unique defining molecular features of 5-aminolevulinic acid+ infiltrative tumor cells associated with glioblastoma recurrence and poor survival
Source: Research Square preprint supplement (doi:10.21203/rs.3.rs-780275/v1), 2021-08-04
Supplement: Supplementary file 6 [file Supplementary table 4.xlsx]

## Sheet: Tumor Core
Subtype enriched in tumor core	pval	padj	log2err	ES	NES	size	leadingEdge
VERHAAK_GLIOBLASTOMA_CLASSICAL	0.000448857	0.00134657	0.498493	0.472483	1.44	100	NES MEGF8 ZNF304 GARRE1 LAMB2 GLG1 SEMA6D ZNF45 PTPN14 ZNF419 SLC4A4 LRFN3 DMWD POFUT1 CREB5 ITGB8 CDH2 EXTL3 ARNTL ADGRG1 NPAS3 SHOX2 PIPOX NPEPL1 B3GALT1 SOX9 NDP BLM PCSK5 DENND2A GJA1 KLHDC8A LRP10 SNTA1 SLC6A11 ARAP3 SMO ACSBG1 RIN1 KLHL4 CDH6 BTBD2 OSBPL3 TEAD3 SLC2A10 HSPBP1 JAG1 DLC1 LRP5 CDK6 ANXA5 HMG20B NR2E1 KEAP1 FGFR3 ACSL3 ABCD2 RBCK1 PLA2G5 IRS2 PEPD LHFPL6 CAMK2B CALM1 MLC1
VERHAAK_GLIOBLASTOMA_PRONEURAL	0.011583	0.0173745	0.38073	0.436843	1.23	126	ZNF510 NCALD ZNF184 CAMSAP2 ABAT TTC3 ADGRB3 GSTA4 MAST1 GPM6A NOL4 TSPAN3 SATB1 NLGN3 TMCC1 TOPBP1 ADGRL3 DBN1 DGKI FBXO21 MPPED2 CSPG5 ATAD5 CILK1 RAP2A RUFY3 SCG3 CXXC4 TMEM35A CDK5R1 SORCS3 EPHB1 PHLPP1 GRIA2 WASF1 PAK3 CLGN BCL7A LRRTM4 TOX3 PFN2 DCX ZC4H2 FAM110B PLCB4 CRB1 GNG4 ARHGAP33 E2F3 MARCKS SPTBN2 MMP15 CNTN1 ZNF711 PAK5 NRXN1 SCN3A MLLT11 ARHGEF9 CHD7 BEX1 ATP1A3 TTYH1 NRXN2 FGF9 …

## Sheet: Tumor Rim
Subtype enriched in tumor rim	pval	padj	log2err	ES	NES	size	leadingEdge
VERHAAK_GLIOBLASTOMA_CLASSICAL	1.91288e-05	5.73863e-05	0.57561	0.496612	1.56	100	MEGF8 LAMB2 SLC4A4 GARRE1 GLG1 NES ZNF304 ZNF419 ITGB8 SEMA6D LRFN3 SLC6A11 ZNF45 PTPN14 SOX9 KLHDC8A NPAS3 POFUT1 CDH2 GJA1 ARNTL NDP PIPOX DMWD ADGRG1 RIN1 DLC1 SHOX2 CDK6 PCSK5 B3GALT1 CREB5 SNTA1 LRP10 JAG1 EXTL3 CDH6 NPEPL1 MLC1 BTBD2 SMO DENND2A HSPBP1 ACSBG1 NR2E1 PLA2G5 TEAD3 ABCD2 KEAP1 ANXA5 BLM HMG20B IRS2 LRP5 OSBPL3 SLC2A10 RBCK1 LMO2 LHFPL6 ARAP3 KLHL4 FGFR3 PEPD CAMK2B ACSL3 CALM1 …
VERHAAK_GLIOBLASTOMA_PRONEURAL	0.025974	0.038961	0.282013	0.423505	1.22	126	ZNF510 NCALD ABAT TSPAN3 MPPED2 ZNF184 GSTA4 TTC3 ADGRB3 NOL4 CAMSAP2 DBN1 GPM6A MAST1 CILK1 TMCC1 TOPBP1 RUFY3 RAP2A TMEM35A GNG4 ADGRL3 FBXO21 NLGN3 PFN2 CLGN SORCS3 DGKI SATB1 PHLPP1 CDK5R1 E2F3 PAK5 NRXN1 GRIA2 WASF1 FGF9 BCL7A PLCB4 EPHB1 CXXC4 NRXN2 SCG3 ARHGAP33 DCX CSPG5 ZC4H2 LRRTM4 PAK3 SPTBN2 DUSP26 FAM110B ATAD5 HDAC2 CNTN1 BEX1 DPP6 MARCKS MLLT11 ZNF711 PODXL2 CRB1 MMP15 AMOTL2 C1QL1…

## Sheet: Invasive Region
Subtype enriched in invasive region	pval	padj	log2err	ES	NES	size	leadingEdge
VERHAAK_GLIOBLASTOMA_NEURAL	1e-10	2e-10		0.697149	2.64252	76	ROGDI GRM3 PDE6D PLCL1 FEZF2 S1PR1 RERGL GABARAPL2 EDIL3 RND1 DHRS9 SERPINI1 MGST3 CPNE6 GNAI1 SH3GL3 TTPA REPS2 ENPP2 DYNC1I1 FBXO3 CCK NTSR2 CAMK2G HPCAL4 SNCG ANXA3 PGBD5 TMEM144 FUT9 PPFIA2 ETNPPL GRM1 EPB41L3 CHN1 SH3GL2 ANXA7 SELENOW AGTPBP1 VIP SLC31A2 KCNJ3 CLCA4 YPEL5 TCEAL2 ANKRD46 NSL1 USP33 MYBPC1 GUK1 CYTH1 GABRB2 HPRT1 COX5B IMPA1 SIRT5 MBP CASQ1 PPA1 SPAST TTC1 TCEAL1 PRPSAP2 AKR7A3
VERHAAK_GLIOBLASTOMA_PRONEURAL	0.0807522	0.0807522	0.16318	0.313615	1.39762	126	STMN4 NRXN2 MYO10 MPPED2 IL1RAPL1 ADGRB3 NRXN1 DPP6 REEP1 NLGN3 SEZ6L ARHGAP33 PDE10A BEX1 PHLPP1 CDK5R1 ACTR1A ABAT SPTBN2 NCALD MAP2 CSPG5 CLASP2 CNTN1 MAST1 GPM6A PAK3 DPF1 NOL4 PAK5 DUSP26 RNFT2 CKB MYT1 SCG3 GRIA2 TMEM35A ERBB3 SATB1 CLGN ZNF821 ZFP69B TSPAN3 PCDH11Y DGKI RUFY3 WASF1
VERHAAK_GLIOBLASTOMA_CLASSICAL	0.0139464	0.0185953	0.38073	0.366957	1.4532	100	GNG7 RGS12 CALM1 ARAP2 ACSBG1 FGFR3 SNTA1 CAMK2B ACSL3 TGFB3 CDH4 PEPD SEMA6A SEPTIN11 KLHL4 SLC6A11 ABCD2 DLC1 BTBD2 MEGF8 DMWD ADGRG1 CARMIL1 PLIN3 CC2D1A SSH3 NPEPL1 MEIS1 HSPBP1 RASGRP1 GJA1 SLC4A4 MLC1 RIN1 B3GALT1 LHFPL6 ARNTL LRP5 GRIK5 EXTL3 NDP LMO2 SPRY2

## Sheet: 5ALA-
Subtype enriched in ALA negative	pval	padj	log2err	ES	NES	size	leadingEdge
VERHAAK_GLIOBLASTOMA_NEURAL	0.122265	0.122265	0.141225	0.274226	1.27228	76	HPRT1 PDE6D CAMK2G MBP MGST3 HPCAL4 SLC16A7 MYBPC1 FBXO3 TTC1 VIP TCEAL2 KCNJ3 TTPA REPS2 CHN1 MAT2B YPEL5 NSL1 PLCL1 VSX1 PPA1 GUK1 S1PR1 GRM1 COX5B SNCG DHRS9 CCK ANXA3 PRPSAP2 ETNPPL SELENOW FUT9 AKR7A3 CASQ1 IMPA1 PPFIA2 GNAI1 USP33 RND1
VERHAAK_GLIOBLASTOMA_PRONEURAL	0.000105252	0.000210504	0.538434	0.371729	1.86904	126	MPPED2 MYB NCALD TMEM35A DBN1 TSPAN3 PFN2 NLGN3 GSTA4 BCL7A GPM6A C1QL1 SCG3 OLIG2 ZC4H2 FAM110B EPHB1 GNG4 CLGN ATP1A3 MAST1 DUSP26 RUFY3 BEX1 CXXC4 PLCB4 CILK1 ZNF184 WASF1 SORCS3 INAVA CDC25A ABAT PAK5 MCM10 DCX NOL4 PCDH11X TTYH1 CSPG5 CDK5R1 DLL3 DGKI PAK3 TOX3 JPT1 PHLPP1 AMOTL2 PODXL2 LRRTM4 CNTN1 MMP15 FGF9 CKB ADGRB3 RAP2A ZNF510 TTC3 MLLT11 SATB1 GRIA2 ADGRL3 TMCC1 SPTBN2 MARCKSL1 STMN4…

## Sheet: 5ALA+
Subtype enriched in ALA positive	pval	padj	log2err	ES	NES	size	leadingEdge
VERHAAK_GLIOBLASTOMA_MESENCHYMAL	5.87427e-07	2.34971e-06	0.659444	0.323083	2.09892	164	FCGR2A TRPM2 CTSB MAN2B1 LTBP2 MSR1 SLC11A1 THEMIS2 LHFPL2 BNC2 CD14 IL4R ALOX5 C1orf54 SYNGR2 FES MAN1A1 CYTH4 MAPK13 FURIN DAB2 MAN2A1 ENG UCP2 TEC COLGALT1 ST14 SAT1 SEC24D CAVIN1 CDCP1 SIGLEC9 CCR5 CTSZ IL1R1 ALDH3B1 NOD2 PHF11 TGFBI TNFRSF11A COL8A2 BLVRB SLC16A3 PTGER4 ARHGAP29 CASP5 CTSC FMNL1 TCIRG1 TNFAIP8 RAB11FIP1 AMPD3 LRRFIP1 TLR2 SHC1 STXBP2 DSC2 MGAT1 GNA15 PLBD1 C5AR1 FPR3 NRP1 SE…

## Sheet: Classical
Genes	Rank
ABCD2	1.16269
ACSL3	1.04865
ADGRG1	0.922633
ANXA5	0.697225
ARAP2	0.895287
ARAP3	0.712954
ARNTL	1.07798
BLM	0.819862
BTBD2	0.887679
CALM1	0.694374
CARMIL1	0.827103
CC2D1A	1.53747
CD151	0.673178
CDH2	1.34846
CDH4	1.01357
CREB5	0.943883
DAG1	2.20799
DLC1	0.805271
DMWD	1.45906
FGFR3	0.976706
GJA1	1.18029
GLG1	1.71035
GRIK5	2.01114
HMG20B	0.76772
HSPBP1	0.967226
ITGB8	1.89733
JAG1	0.914969
KEAP1	1.22452
KLHDC8A	1.46238
LAMB2	1.32388
LHFPL6	1.37875
LMO2	0.771608
LRP10	0.787021
LRP5	1.38404
MEGF8	1.93004
MEIS1	0.761646
MEOX2	0.660245
MLC1	1.07696
NES	1.37025
NPAS3	1.35437
NR2E1	0.78342
NR2F6	1.4929
PIPOX	0.841559
PLA2G5	0.641282
POFUT1	1.32105
RASGRP1	1.02514
RBCK1	1.08456
RGS6	1.18378
SEMA6A	0.892554
SEMA6D	1.20758
SEPTIN11	2.07044
SLC2A10	0.950225
SLC4A4	2.27316
SLC6A11	1.28875
SMO	1.21018
SNTA1	1.31205
TEAD3	1.30893
TLE2	0.642645
TMEM161A	0.716071
TRIP6	1.16361
WSCD1	0.715027
ZNF419	1.79867
ZNF45	1.44551

## Sheet: Neural
Genes	Rank
AGTPBP1	0.391576
AKR7A3	0.262634
ANKRD46	0.359463
ANXA3	0.437334
ANXA7	0.400358
CAMK2G	0.450819
CASQ1	0.313363
CCK	0.461904
CHN1	0.407059
CLCA4	0.371346
COX5B	0.325073
CPNE6	0.490462
CYTH1	0.342231
DHRS9	0.50579
DYNC1I1	0.471281
EDIL3	0.528255
ENPP2	0.477756
EPB41L3	0.407576
ETNPPL	0.415688
FBXO3	0.471248
FEZF2	0.565439
FUT9	0.425488
GABARAPL2	0.529389
GABRB2	0.334008
GNAI1	0.487238
GRM1	0.411871
GRM3	0.607354
GUK1	0.346772
HPCAL4	0.450022
HPRT1	0.333874
IMPA1	0.324056
KCNJ3	0.377978
MBP	0.315478
MGST3	0.497583
MYBPC1	0.349099
NSL1	0.35445
NTSR2	0.460133
PDE6D	0.595178
PGBD5	0.432011
PLCL1	0.570286
PPA1	0.292198
PPFIA2	0.41676
PRPSAP2	0.266116
REPS2	0.480679
RERGL	0.533058
RND1	0.512087
ROGDI	0.614101
S1PR1	0.548011
SELENOW	0.392598
SERPINI1	0.498612
SH3GL2	0.405018
SH3GL3	0.484069
SIRT5	0.320172
SLC31A2	0.379516
SNCG	0.441131
SPAST	0.284679
TCEAL1	0.266865
TCEAL2	0.364306
TMEM144	0.426231
TTC1	0.273524
TTPA	0.483608
USP33	0.352129
VIP	0.390702
YPEL5	0.367643

## Sheet: Proneural
Genes	Rank
ABAT	0.333933
ADGRB3	0.218977
ADGRL3	0.194521
AMOTL2	0.269455
ATP1A3	0.390034
BCL7A	0.508678
BEX1	0.384564
C1QL1	0.471193
CDC25A	0.336655
CDK5R1	0.302941
CHD7	0.168576
CILK1	0.35489
CKB	0.226853
CLGN	0.393668
CNTN1	0.258096
CRB1	0.165227
CSPG5	0.304055
CXXC4	0.375192
DBN1	0.541817
DCX	0.327045
DGKI	0.298118
DLL3	0.301186
DUSP26	0.386463
EPHB1	0.411939
FAM110B	0.430373
FGF9	0.2428
GNG4	0.409516
GPM6A	0.495951
GRIA2	0.194705
GSTA4	0.511182
INAVA	0.338037
JPT1	0.27959
LRRTM4	0.266935
MARCKSL1	0.180552
MAST1	0.387457
MCM10	0.329278
MLLT11	0.196514
MMP15	0.24294
MMP16	0.176578
MPPED2	0.861422
MYB	0.664254
NCALD	0.604875
NLGN3	0.521079
NOL4	0.325581
OLIG2	0.457671
PAK3	0.29268
PAK5	0.333332
PCDH11X	0.316503
PFN2	0.528744
PHLPP1	0.269935
PLCB4	0.362887
PODXL2	0.267646
RAB33A	0.172463
RAP2A	0.207446
RUFY3	0.385971
SATB1	0.195132
SCG3	0.468991
SORCS3	0.341072
SPTBN2	0.183723
STMN4	0.178059
TMCC1	0.191572
TMEM35A	0.589103
TOX3	0.284354
TSPAN3	0.537685
TTC3	0.196895
TTYH1	0.311523
WASF1	0.346767
ZC4H2	0.453814
ZNF184	0.351077
ZNF510	0.202683

## Sheet: Mesenchymal
Genes	Rank
ALDH3B1	0.311896
ALOX5	0.438926
AMPD3	0.259423
ANXA1	0.12918
ARHGAP29	0.284493
ASL	0.163701
BLVRB	0.289315
BNC2	0.459518
C1orf54	0.402445
C5AR1	0.223134
CASP5	0.283072
CAVIN1	0.320748
CCR5	0.317097
CD14	0.459165
CD4	0.175155
CDCP1	0.320216
COL8A2	0.290406
COLGALT1	0.332856
CTSB	0.484508
CTSC	0.282519
CTSZ	0.314383
CYTH4	0.384474
DAB2	0.356414
DRAM1	0.132191
DSC2	0.24508
EMP3	0.114157
ENG	0.349298
FCGR2A	0.645372
FES	0.396248
FHL2	0.115072
FMNL1	0.277318
FOLR2	0.171152
FPR3	0.219036
FURIN	0.363432
GNA15	0.236989
GRN	0.13245
IL1R1	0.312876
IL4R	0.442617
ITGA5	0.198499
LHFPL2	0.465879
LRRFIP1	0.257971
LTBP2	0.479949
MAN1A1	0.385579
MAN2A1	0.351158
MAN2B1	0.480144
MAPK13	0.382095
MFSD1	0.12515
MGAT1	0.237645
MSR1	0.479656
MYH9	0.195719
MYOF	0.144697
NOD2	0.30584
NRP1	0.212131
PHF11	0.304136
PLA2G15	0.109761
PLAUR	0.138427
PLBD1	0.232994
PTGER4	0.286292
PYGL	0.108296
RAB11FIP1	0.269853
RRAS	0.140307
SAT1	0.32474
SEC24D	0.324714
SERPINE1	0.210002
SHC1	0.25123
SIGLEC7	0.124478
SIGLEC9	0.317178
SLC10A3	0.107305
SLC11A1	0.474958
SLC16A3	0.286772
SP100	0.1229
ST14	0.327663
STXBP2	0.247565
SWAP70	0.157355
SYNGR2	0.400877
TCIRG1	0.276809
TEC	0.337967
TGFBI	0.300131
THBS1	0.145562
THEMIS2	0.469261
TLR2	0.254709
TNFAIP8	0.271554
TNFRSF11A	0.292286
TRADD	0.157447
TRPM2	0.556581
UCP2	0.346567
