# Supplementary material for: Spatial-transcriptomics reveals unique defining molecular features of 5-aminolevulinic acid+ infiltrative tumor cells associated with glioblastoma recurrence and poor survival
Source: Research Square preprint supplement (doi:10.21203/rs.3.rs-780275/v1), 2021-08-04
Supplement: Supplementary file 7 [file Supplementary table 5.xlsx]

## Sheet: Tumor Core
Gene set enriched in tumor core	pval	padj	log2err	ES	NES	size	leadingEdge
DEVELOPMENTAL	1e-10	3e-10		0.536868	1.58265	650	ZNF767P MED9 THAP5 ZNF510 YES1 TMEM106B CROCCP3 ZNF471 ZNF696 ZKSCAN5 PIGX HEY1 ZMAT1 KLHL42 ZNF197 ZNF12 SIKE1 PARS2 NEK4 CFAP36 ZNF324B PRPF38A CRKL ZNF555 EPB41L5 LMBR1 MBOAT2 ABI2 KIAA1143 ZNF549 ZNF773 ZFP62 ZFP2 ZNF234 ZNF461 BRD8 PJA1 DPYSL2 ZNF680 RBM26-AS1 CTNND2 WDR19 ZBED8 ZNF629 PNMA2 ZNF836 NIM1K ACTR3B ZNF302 FYN POLR1B REEP2 STMN3 MTX3 SRI ZYG11B GRIK4 ATP6AP1L TECTA ZNF780A PHF14 …
GLYCOLYTIC_GPM	9.26096e-09	1.38914e-08	0.74774	0.650668	2.6433	39	P4HB FOSL2 GRN ITGA5 METRNL SIGLEC7 PLAUR NRP1 S100A11 FN1 CTSB ADAM12 DAB2 GAA DOK3 LTBP2 C5AR1 TCIRG1 MAN2B1 MGAT1 IL4R LHFPL2 RIN3 FES ELL

## Sheet: Tumor Rim
Gene set enriched in tumor rim	pval	padj	log2err	ES	NES	size	leadingEdge
DEVELOPMENTAL	1e-10	3e-10		0.554601	1.67027	650	ATP1B2 FAM110D ZNF12 MED9 PPP1R3C CCR10 ZNF471 SLC4A4 CHDH ZMAT1 ZNF302 RORA REEP2 ZNF767P ZNF234 WDR19 PARS2 ZNF773 ZNF57 DPY19L3 PIGX OBSL1 FYN ZKSCAN5 ZNF780A PHF14 ABHD17C TDRP ZNF627 THAP5 ZNF256 CBARP C19orf18 ZNF549 ZNF585B ZNF680 ZNF324B ZNF461 ZNF527 ZNF181 ZFP2 CTNND2 LMBR1 TMEM106B DPY19L1 PON2 ZNF197 ZBED8 NEK4 EPB41L5 ZNF696 ZNF419 HEY1 ZNF510 HOOK2 FBXO45 WNT7A DAGLA RBM26-AS1 SIKE1…
GLYCOLYTIC_GPM	1e-10	1.5e-10		0.737703	3.23351	39	FN1 ITGA5 CTSB SIGLEC7 METRNL FOSL2 P4HB PLAUR NRP1 GRN S100A11 ADAM12 C5AR1 DAB2 DOK3 TCIRG1 LTBP2 IL4R MGAT1 GAA MYH9 RIN3 FES MAN2B1 LHFPL2

## Sheet: Invasive Region
Gene set enriched in invasive region	pval	padj	log2err	ES	NES	size	leadingEdge
DEVELOPMENTAL	1e-10	2e-10		0.49824	1.58284	650	ZNF767P CTNND2 ZNF471 MYO6 ITM2C CROCCP3 MBOAT2 WDFY3-AS2 EPB41L5 ZNF780A ZNF197 GPM6B CCR10 DTNA PARS2 ZNF221 BRD8 GPT2 ZBED8 ATP1B2 YES1 ZNF234 ZNF566 DPYSL2 ZFP62 ZMAT1 C1QTNF3 THAP5 TECTA TMIE ZNF696 MTERF2 ZNF302 ZNF773 PIGX PDIK1L ZFP2 ZNF324B RAB3IP PEX5 ZNF12 FYN ZNF549 FBXW11 POU2F1 ZNF461 ICA1L ZNF491 NEK4 TJP1 TMEM106B PHLPP1 LINC00298 ZNF555 C19orf18 ZNF510 NTRK2 RBM26-AS1 KIAA1143 SL…

## Sheet: 5ALA-
Gene set enriched in 5ALA-	pval	padj	log2err	ES	NES	size	leadingEdge
DEVELOPMENTAL	1e-10	4e-10		0.389686	2.31137	650	PON2 MPPED2 PPP5C STMN3 C2orf80 SRI FYN MZB1 HOOK2 NCALD RORA BBOX1 REEP2 SLN KLHDC8A NRN1 PTN RHBDL3 RGS6 GRIA4 MST1 CHIT1 TSPAN3 RBM26-AS1 ZIK1 BCHE CHRM1 MDFI YES1 NPDC1 HEY1 NLGN3 CCR10 SMARCC2 GAP43 ZNF853 CELF5 NDRG4 F12 GSTA4 LOC728392 WDFY3-AS2 BCL7A PTP4A3 ZNF738 ADGRA1 PLEKHH3 GPM6A CD247 NYAP1 VGF NPNT ZNF461 EEF1A2 TMEM106B LINC00634 FCGR3B MEOX2 RAB3C ATP1B2 PIP4K2B GPT2 LINC00665 SC…
GLYCOLYTIC_GPM	0.000105115	0.000105115	0.538434	0.357159	1.89928	39	PLAUR IL10RA S100A11 HCLS1 C5AR1 RHOG MYO1F PARVG
MITOCHONDRIAL_MTC	1.2426e-08	3.7278e-08	0.74774	0.658827	3.28446	27	NDUFB1 RPL27 DPM3 UBL5 COX5B C19orf53 SNRPG ALKBH7 COX6A1 NDUFA7 NDUFB7 NDUFA4 PFDN5 TMPRSS6 SLC12A3 COX7B

## Sheet: 5ALA+
Gene set enriched in 5ALA+	pval	padj	log2err	ES	NES	size	leadingEdge
WOUND RESPONSE	3.08164e-08	4.62247e-07	0.719513	0.593144	1.60639	760	IL1B CXCL8 RYR2 DUSP1 TMSB4X B2M ANKRD20A5P NFKBIA TMSB10 KLK10 IL1R1 CD83 CSF2RB MEIS2 RGS1 ITGA9 RBFOX3 CYBA IL6 SLITRK6 LAMA3 NDST3 EHF SERPINE1 UCP2 ENAM MUC17 FCGBP SORBS2 NEXN IL31RA ABL2 SNTB2 FAM210B SULF1 RNASET2 AKAP9 TGM4 PLS1 THEGL PLCXD3 NEDD4 ICAM1 ALPK2 NR4A2 RASAL3 IER2 PTPN14 G0S2 GADD45B HMOX1 DENND3 GFPT1 IL1A KLF2 PTGS2 NEK1 ABI3BP CD68 PLAUR C5AR1 SLC2A5 SCARA3 CCL2 ALOX5AP A…
GLYCOLYTIC_GPM	1.50688e-06	3.01375e-06	0.643552	0.552568	2.56375	39	GAA CTSB MAN2B1 LTBP2 RIN3 LHFPL2 IL4R IL10RA FES FURIN DAB2 TBC1D22A FOSL2 PARVG TCIRG1 METRNL MGAT1 C5AR1 NRP1 ITGA5 MYH9
MITOCHONDRIAL_MTC	0.00531665	0.00797497	0.407018	0.329337	1.5599	27	NDUFB1 MRPL54 RPL27 NDUFA7 NDUFB7 DPM3 AQP10 ALKBH7 COX5B PFDN5 PRSS22 C19orf53 COX6A1 MRPS15

## Sheet: GPM
Genes	Rank
C5AR1	0.223134
CTSB	0.484508
DAB2	0.356414
FES	0.396248
FOSL2	0.314252
FURIN	0.363432
IL10RA	0.401888
IL4R	0.442617
ITGA5	0.198499
LHFPL2	0.465879
LTBP2	0.479949
MAN2B1	0.480144
METRNL	0.257889
MGAT1	0.237645
MYH9	0.195719
NRP1	0.212131
PARVG	0.302159
RIN3	0.471732
TBC1D22A	0.325989
TCIRG1	0.276809

## Sheet: MTC
Genes	Rank
ALKBH7	0.313263
AQP10	0.314963
C19orf53	0.24506
COX5B	0.285963
COX6A1	0.242471
DPM3	0.33056
MRPL54	0.495006
MRPS15	0.226476
NDUFA7	0.463767
NDUFB1	0.568101
NDUFB7	0.366322
PFDN5	0.264281
PRSS22	0.261787
RPL27	0.483817

## Sheet: Wound Response
Genes	Rank
ABCA13	2050.99
ABI3BP	4595.55
ABL2	8796.81
ADAMTS14	1602.5
ADAMTSL5	947.986
AKAP9	7999.46
ALDH3B1	3567.93
ALOX5AP	3990.01
ALPK2	6305.05
ANKRD20A5P	17164.6
ANO2	1171.4
ARHGDIB	2663.94
ATP8B4	3922.04
B2M	17458.7
B4GALT1	2150.52
BTBD11	1814.17
C12orf75	1685.71
C5AR1	4350.38
CAPG	2181.64
CCDC178	2828.07
CCL2	4038.47
CCL20	1066.14
CD180	1926.56
CD68	4457.97
CD83	14174.1
CHIC1	1152.4
CLMP	1763.91
CMTM7	971.417
CSF2RB	14171.4
CTSS	1862.48
CXCL2	1555.82
CXCL3	1597.86
CXCL8	23848.6
CYBA	10402.9
CYTH4	1448.45
CYTIP	1104.36
DENND3	5531.66
DMD	2065.39
DUSP1	19790.9
EHF	9858.5
ENAM	9340.95
ENPP5	2080.8
EPSTI1	2608.67
EREG	1488.8
ETS2	2885.87
FAM174B	1497.5
FAM210B	8374.85
FBLN1	1941.79
FCGBP	9140.06
FES	1039.39
FHL2	3056.59
FMNL1	2466.63
FOSL1	1203.34
G0S2	5899.6
GADD45B	5708.73
GFPT1	5426.56
GJB3	1864.31
GNA14	1718.65
GOLGA4	2337.41
GYPC	1308.81
HBEGF	2544.04
HCK	1014.12
ICAM1	6993.21
IER2	6098.94
IFI44L	2764.53
IFITM2	1549.59
IKZF3	1498.05
IL18	916.147
IL1A	5291.6
IL1B	26496.7
IL1R1	14763.2
IL1R2	1330.4
IL1RN	2053.63
IL31RA	8834.54
IL6	10279.2
IRAK2	974.529
ITGA9	10977.3
ITGB6	1188.87
ITPRIP	1734.36
KCNS3	1983.92
KLF2	4791.03
KLK10	14781.7
LAMA3	9874.4
LCP1	2475.22
LEKR1	2065.8
LOC442497	3736.71
MAFF	2057.36
MAP2K3	2123.99
MEIS2	13489
MGLL	2711.46
MMP19	1471.92
MMP25	995.275
MOV10L1	1234.18
MSR1	2368.73
MUC17	9209.79
NCF2	1208.34
NDNF	1308.23
NDST3	9870.87
NEDD4	7127.48
NEK1	4652.19
NEXN	8855.37
NFKB2	1576.1
NFKBIA	16590.1
NR4A2	6204.1
OLFML3	2470.85
OSM	1118.11
PCSK5	1820.14
PICK1	2996.42
PIGR	1214.73
PLAUR	4402.17
PLBD1	1756.12
PLCXD3	7152.07
PLS1	7722.35
PMM2	2053.07
PNOC	2973.06
POLR2L	1131.29
PRDM1	2319.18
PRDM8	893.461
PTGER4	1314.34
PTGS2	4695.6
PTPN14	6092.48
PTPRQ	1873.1
RAB20	1528.75
RASAL3	6111.54
RBFOX3	10814.5
RELN	2239.67
RGS1	12825.7
RGS10	1261.5
RILPL2	1424.54
RNASET2	8170.12
RND3	3664.74
RYR2	20977.3
S100A11	1771.72
S100A4	2188.02
SCARA3	4084.73
SELPLG	1516.12
SERPINB1	2061.15
SERPINB9	1940.26
SERPINE1	9791.77
SH3TC1	2108.11
SLC16A3	3706.75
SLC2A5	4253.77
SLC7A7	1177.94
SLFN5	1490.02
SLITRK6	10031.9
SNTB2	8480.65
SORBS2	9120.19
SPHK1	1272.19
STX11	1242.45
STYK1	1032.22
SUGT1P1	1004.95
SULF1	8320.17
SYDE2	1161.94
TBXAS1	1401.71
TGM4	7921.62
THEGL	7654.66
TLR2	1576.45
TMSB10	14964
TMSB4X	19451.6
TMTC3	1656.62
TNFAIP8L3	1454.03
TOR4A	1149.31
TPTE2P6	2145.57
TYRP1	2708.68
UCP2	9449.12
XKR3	1528.39
