# Supplementary material for: Spatial-transcriptomics reveals unique defining molecular features of 5-aminolevulinic acid+ infiltrative tumor cells associated with glioblastoma recurrence and poor survival
Source: Research Square preprint supplement (doi:10.21203/rs.3.rs-780275/v1), 2021-08-04
Supplement: Supplementary file 8 [file Supplementary table 6.xlsx]

## Sheet: TF-Target Network in 5ALA+ cell
	TF
	NFKB1	REL	NFKBIA	KLF4	IRF8	FOS	EGR2	FOSL2
Total target Gene Count	85	76	80	72	100	35	84	103
Average of Mutual information (MI)	0.199	0.259	0.252	0.333	0.312	0.241	0.29	0.161
Count of TNFA genes	13	11	22	21	12	8	21	19
Average Mutual information (MI) of TNFA	0.189	0.279	0.29	0.416	0.257	0.35	0.344	0.165
Count of Injury response genes	23	25	32	33	33	16	28	26
Average Mutual information (MI) of Injury respone	0.168	0.22	0.239	0.283	0.356	0.193	0.28	0.155
Count of Mesenchymal genes	26	17	11	5	29	4	16	30
Average Mutual information (MI) of Mesenchymal	0.213	0.285	0.174	0.271	0.246	0.168	0.241	0.178
Count of MTC genes	3	3	2	1	1	2		7
Average Mutual information (MI) of MTC	0.244	0.207	0.14	0.109695	0.116958	0.108		0.155
Count of GPM genes	8	5	6	1	5	1	8	6
Average Mutual information (MI) of GPM	0.225	0.29	0.313	0.184616	0.362	0.42329	0.267	0.132
Count of Inflammatory response genes	10	14	7	11	20	4	11	15
Average Mutual information (MI) of Inflammatory respone	0.187	0.27	0.29	0.384	0.368	0.305	0.302	0.145
TFs	Gene Count	Average (MI)	TNFA gene count	Avg. MI of TNFA	Inf. Wound res. gene count	Avg. MI Inf. Wound Res	Mesenchymal gene count	Avg. MI Mesenchymal	MTC gene count	Avg. MI MTC	GPM gene count	Avg. MI GPM	Inf. Res. Gene count	Avg. MI Inf. Res
FOSL2	103	0.161	19	0.165	26	0.155	30	0.178	7	0.155	6	0.132	15	0.145
IRF8	100	0.312	12	0.257	33	0.356	29	0.246	1	0.116958	5	0.362	20	0.368
NFKB1	85	0.199	13	0.189	23	0.168	26	0.213	3	0.244	8	0.225	10	0.187
EGR2	84	0.29	21	0.344	28	0.28	16	0.241			8	0.267	11	0.302
NFKBIA	80	0.252	22	0.29	32	0.239	11	0.174	2	0.14	6	0.313	7	0.29
REL	76	0.259	11	0.279	25	0.22	17	0.285	3	0.207	5	0.29	14	0.27
KLF4	72	0.333	21	0.416	33	0.283	5	0.271	1	0.109695	1	0.184616	11	0.384
FOS	35	0.241	8	0.35	16	0.193	4	0.168	2	0.108	1	0.42329	4	0.305
