# Supplementary material for: Spatial-transcriptomics reveals unique defining molecular features of 5-aminolevulinic acid+ infiltrative tumor cells associated with glioblastoma recurrence and poor survival
Source: Research Square preprint supplement (doi:10.21203/rs.3.rs-780275/v1), 2021-08-04
Supplement: Supplementary file 11 [file Supplementary table 9.xlsx]

## Sheet: positive_correlation
i	j	cor	p-value
mRNAsi	TGM4	0.953539	1.93e-05
mRNAsi	FHL2	0.896449	0.000443179
mRNAsi	THEGL	0.866598	0.00117587
mRNAsi	RELN	0.863264	0.00129243
mRNAsi	SLITRK6	0.828379	0.00306832
mRNAsi	LAMA3	0.822772	0.00346438
mRNAsi	ATP2B1	0.815066	0.0040669
mRNAsi	MUC17	0.810652	0.00444393
mRNAsi	TPTE2P6	0.802025	0.00525214
mRNAsi	EHF	0.801379	0.00531657
mRNAsi	LEKR1	0.796127	0.00586156
mRNAsi	UCP2	0.789313	0.0066266
mRNAsi	CCDC178	0.784344	0.00722733
mRNAsi	PLCXD3	0.771481	0.00896038
mRNAsi	GNA14	0.770708	0.00907309
mRNAsi	ABCA13	0.769623	0.0092329
mRNAsi	ITGB6	0.765623	0.00983936
mRNAsi	XKR3	0.765161	0.00991118
mRNAsi	IL6	0.763832	0.0101197
mRNAsi	ENAM	0.763121	0.0102325
mRNAsi	PIGR	0.756289	0.0113626
mRNAsi	PCSK5	0.750533	0.0123805
mRNAsi	PLS1	0.745863	0.013252
mRNAsi	ANKRD20A5P	0.740832	0.0142377
mRNAsi	KLK10	0.739639	0.0144789
mRNAsi	CLMP	0.735054	0.0154318
mRNAsi	GJB3	0.730081	0.0165142
mRNAsi	PTPRQ	0.729166	0.0167189
mRNAsi	IL31RA	0.724105	0.017883
mRNAsi	BTBD11	0.723225	0.0180911
mRNAsi	PNOC	0.722755	0.0182028
mRNAsi	NMUR1	0.699518	0.0243464
mRNAsi	NDST3	0.696117	0.0253511
mRNAsi	ALPK2	0.676255	0.0317917
mRNAsi	TOR4A	0.669612	0.034172
mRNAsi	ABI3BP	0.657472	0.0388295
mRNAsi	ANO2	0.65523	0.0397337
mRNAsi	RBFOX3	0.637767	0.047268
mRNAsi	RYR2	0.635319	0.0483946
mRNAsi	NDNF	0.631036	0.0504092
mRNAsi	IKZF3	0.629288	0.0512473
mRNAsi	OSMR	0.610705	0.0607325
mRNAsi	ITGA9	0.60887	0.0617276
mRNAsi	CSF2RB	0.606178	0.0632066
mRNAsi	SYDE2	0.597641	0.0680496
mRNAsi	NEXN	0.585962	0.0750587
mRNAsi	DMD	0.580501	0.0784911
mRNAsi	CD44	0.574572	0.0823297
mRNAsi	TYRP1	0.573185	0.0832454
mRNAsi	FBLN1	0.570836	0.0848102
mRNAsi	MEIS2	0.566818	0.0875303
mRNAsi	NEDD4	0.564571	0.0890764
mRNAsi	MEP1A	0.549026	0.100247
mRNAsi	TACR3	0.547126	0.10167
mRNAsi	TMTC3	0.541682	0.105818
mRNAsi	SULF1	0.525194	0.119027
mRNAsi	SORBS2	0.511212	0.130997
mRNAsi	SNTB2	0.496161	0.144683
mRNAsi	NDUFA7	0.4958	0.145022
mRNAsi	IFI44L	0.487161	0.153267
mRNAsi	PTPN14	0.484617	0.155747
mRNAsi	SEC24D	0.470281	0.170179
mRNAsi	IL1R1	0.40441	0.246391
mRNAsi	EPSTI1	0.400621	0.251267
mRNAsi	ABL2	0.388888	0.266708
mRNAsi	PRDM8	0.383568	0.273875
mRNAsi	MOV10L1	0.379129	0.279936
mRNAsi	ENPP5	0.376938	0.282953
mRNAsi	NRP1	0.372022	0.289787
mRNAsi	ATP8B4	0.364629	0.300229
mRNAsi	ALDH3B1	0.364131	0.300941
mRNAsi	AQP10	0.332367	0.348079
mRNAsi	BDKRB1	0.328258	0.354436
mRNAsi	TBC1D22A	0.326383	0.357354
mRNAsi	STYK1	0.32394	0.361176
mRNAsi	CDCP1	0.31277	0.37891
mRNAsi	ARHGAP29	0.311694	0.380639
mRNAsi	NEK1	0.300324	0.399158
mRNAsi	FAM174B	0.29982	0.399988
mRNAsi	ADAMTSL5	0.283524	0.427288
mRNAsi	SLFN5	0.280153	0.433041
mRNAsi	AKAP9	0.266939	0.455931
mRNAsi	CHIC1	0.238425	0.507097
mRNAsi	SIGLEC9	0.236222	0.511146
mRNAsi	SPSB1	0.230279	0.522137
mRNAsi	AMPD3	0.22919	0.524162
mRNAsi	CCR5	0.221054	0.539388
mRNAsi	MARCO	0.217658	0.545796
mRNAsi	PICK1	0.217048	0.546949
mRNAsi	CCR7	0.206764	0.566549
mRNAsi	GFPT1	0.202184	0.575364
mRNAsi	ADAMTS14	0.193555	0.592106
mRNAsi	KCNS3	0.182696	0.613428
mRNAsi	RND3	0.161895	0.654992
mRNAsi	CD180	0.159546	0.659741
mRNAsi	FAM210B	0.145096	0.689201
mRNAsi	GOLGA4	0.129447	0.721531
mRNAsi	CCNL1	0.123162	0.734633
mRNAsi	SCARA3	0.11873	0.743909
mRNAsi	CXCL9	0.0968152	0.790191
mRNAsi	P2RY2	0.0946591	0.794779
mRNAsi	TRPM2	0.0896063	0.805552
mRNAsi	PMM2	0.0877655	0.809485
mRNAsi	CASP5	0.0787157	0.828872
mRNAsi	NDP	0.077688	0.83108
mRNAsi	PIK3R5	0.0582143	0.873087
mRNAsi	MGLL	0.0572659	0.875141
mRNAsi	MET	0.0480152	0.895209
mRNAsi	FOSL2	0.0421658	0.907926
mRNAsi	FURIN	0.0405945	0.911346
mRNAsi	ST14	0.0395228	0.913679
mRNAsi	ANXA1	0.00232783	0.994908
mRNAsi	RASAL3	0.00134788	0.997052
mRNAsi	CCL5	-0.00175476	0.996161
mRNAsi	C12orf75	-0.0484675	0.894226
mRNAsi	DENND3	-0.0540577	0.882094
mRNAsi	EREG	-0.0573206	0.875022
mRNAsi	CAVIN1	-0.0695999	0.848486
mRNAsi	REL	-0.071612	0.84415
mRNAsi	EGR3	-0.0892407	0.806333
mRNAsi	COL8A2	-0.121506	0.738096
mRNAsi	PHF11	-0.136971	0.705935
mRNAsi	NOD2	-0.146726	0.685859
mRNAsi	PLBD1	-0.154813	0.669348
mRNAsi	THBS1	-0.162572	0.653624
mRNAsi	SERPINB1	-0.174571	0.629553
mRNAsi	TRADD	-0.175259	0.628182
mRNAsi	PDLIM5	-0.200885	0.577872
mRNAsi	TUBB2A	-0.207911	0.56435
mRNAsi	CSF3	-0.22729	0.527703
mRNAsi	SLC10A3	-0.231829	0.519262
mRNAsi	PRSS22	-0.234172	0.514927
mRNAsi	MAN2A1	-0.257567	0.472486
mRNAsi	MMP19	-0.275267	0.441443
mRNAsi	RAB11FIP1	-0.283467	0.427386
mRNAsi	SLC2A5	-0.318005	0.370547
mRNAsi	DUSP4	-0.318036	0.370496
mRNAsi	LIF	-0.319944	0.367472
mRNAsi	RRAS	-0.349215	0.322633
mRNAsi	G0S2	-0.353805	0.315874
mRNAsi	C1orf54	-0.381742	0.276359
mRNAsi	ASL	-0.410921	0.238133
mRNAsi	ICAM1	-0.411828	0.236996
mRNAsi	PTGER4	-0.417271	0.230234
mRNAsi	OLFML3	-0.417529	0.229916
mRNAsi	FOSL1	-0.423589	0.222523
mRNAsi	TLR2	-0.42822	0.216966
mRNAsi	MMP25	-0.428935	0.216115
mRNAsi	SERPINE1	-0.430681	0.214045
mRNAsi	NINJ1	-0.431067	0.21359
mRNAsi	CD40	-0.440158	0.203012
mRNAsi	SHC1	-0.446879	0.195391
mRNAsi	B4GALT1	-0.447643	0.194535
mRNAsi	TEC	-0.461545	0.17935
mRNAsi	BTG3	-0.461868	0.179006
mRNAsi	MAPK13	-0.461883	0.17899
mRNAsi	CSF1	-0.464034	0.176708
mRNAsi	IL1RN	-0.470369	0.170088
mRNAsi	B4GALT5	-0.472319	0.168081
mRNAsi	DDX58	-0.473208	0.16717
mRNAsi	LTBP2	-0.479721	0.16059
mRNAsi	FMNL1	-0.481079	0.159238
mRNAsi	SMAD3	-0.488966	0.151522
mRNAsi	MYH9	-0.501468	0.139762
mRNAsi	NABP1	-0.502612	0.138716
mRNAsi	ARHGDIB	-0.507912	0.133927
mRNAsi	CYTIP	-0.509123	0.132847
mRNAsi	IL10	-0.512731	0.129663
mRNAsi	SLC11A1	-0.519598	0.123733
mRNAsi	LCP1	-0.521368	0.122232
mRNAsi	CXCL3	-0.523737	0.120241
mRNAsi	POLR2L	-0.527474	0.117143
mRNAsi	SLC7A7	-0.528792	0.116061
mRNAsi	TGFBI	-0.531891	0.113545
mRNAsi	FCGBP	-0.534099	0.111772
mRNAsi	SP100	-0.539044	0.107866
mRNAsi	CMTM7	-0.540613	0.106645
mRNAsi	ATF3	-0.552843	0.0974259
mRNAsi	TNFAIP8	-0.556142	0.0950286
mRNAsi	MRPS15	-0.556278	0.0949307
mRNAsi	MRPL54	-0.560818	0.091696
mRNAsi	CCL22	-0.56114	0.0914696
mRNAsi	CSF2	-0.562105	0.0907923
mRNAsi	PRDM1	-0.563334	0.0899341
mRNAsi	IL10RA	-0.565078	0.088726
mRNAsi	HCK	-0.565687	0.0883061
mRNAsi	CD68	-0.56802	0.0867108
mRNAsi	XBP1	-0.574874	0.0821315
mRNAsi	ALOX5	-0.574975	0.0820656
mRNAsi	RIPK2	-0.578829	0.0795612
mRNAsi	PLIN2	-0.582312	0.0773416
mRNAsi	TMSB10	-0.583141	0.076819
mRNAsi	FES	-0.583248	0.0767519
mRNAsi	BCL3	-0.584506	0.075964
mRNAsi	IL18	-0.586422	0.0747742
mRNAsi	TNFRSF11A	-0.587231	0.0742753
mRNAsi	CCL4	-0.587541	0.0740853
mRNAsi	PYGL	-0.590286	0.0724113
mRNAsi	IL1A	-0.590673	0.0721779
mRNAsi	DAB2	-0.591253	0.0718283
mRNAsi	NLRP3	-0.592172	0.071276
mRNAsi	MAN1A1	-0.594813	0.0697058
mRNAsi	LRRFIP1	-0.600755	0.0662562
mRNAsi	IL4R	-0.60101	0.0661102
mRNAsi	TRIB1	-0.601617	0.065765
mRNAsi	ENG	-0.60672	0.0629071
mRNAsi	CD4	-0.615072	0.0584075
mRNAsi	S100A4	-0.616795	0.0575065
mRNAsi	MAN2B1	-0.618947	0.0563941
mRNAsi	FOLR2	-0.626395	0.0526544
mRNAsi	BLVRB	-0.626513	0.0525966
mRNAsi	MSR1	-0.627322	0.0522009
mRNAsi	SCARF1	-0.627994	0.0518733
mRNAsi	NFKB2	-0.630484	0.0506731
mRNAsi	EMP3	-0.632019	0.0499421
mRNAsi	RPL27	-0.634245	0.0488949
mRNAsi	SOCS3	-0.634858	0.048609
mRNAsi	CCL2	-0.636867	0.04768
mRNAsi	IL1B	-0.641953	0.0453816
mRNAsi	CYTH4	-0.648522	0.0425243
mRNAsi	ETS2	-0.650854	0.0415399
mRNAsi	SLC16A3	-0.65272	0.0407629
mRNAsi	PFDN5	-0.659333	0.0380892
mRNAsi	SLC11A2	-0.662608	0.03681
mRNAsi	PLEK	-0.666547	0.0353101
mRNAsi	HMOX1	-0.667995	0.0347694
mRNAsi	DPM3	-0.668414	0.0346139
mRNAsi	S100A11	-0.668895	0.034436
mRNAsi	CYBB	-0.674327	0.0324703
mRNAsi	CTSB	-0.677126	0.031488
mRNAsi	SPHK1	-0.678386	0.0310524
mRNAsi	CTSC	-0.679693	0.0306049
mRNAsi	PDE4B	-0.680591	0.0303001
mRNAsi	NFKB1	-0.681345	0.0300456
mRNAsi	TMSB4X	-0.681617	0.0299543
mRNAsi	C5AR1	-0.682557	0.0296399
mRNAsi	DNAJB4	-0.682685	0.0295973
mRNAsi	LITAF	-0.686051	0.0284909
mRNAsi	IFITM1	-0.687084	0.028157
mRNAsi	CD14	-0.688316	0.0277624
mRNAsi	IRF8	-0.689798	0.0272927
mRNAsi	CYBA	-0.69161	0.0267259
mRNAsi	CXCL8	-0.692897	0.0263284
mRNAsi	MGAT1	-0.69651	0.0252336
mRNAsi	MAP2K3	-0.697279	0.0250048
mRNAsi	C19orf53	-0.697867	0.0248308
mRNAsi	RNASET2	-0.698387	0.0246776
mRNAsi	CAPG	-0.6986	0.0246149
mRNAsi	PLAUR	-0.699618	0.0243173
mRNAsi	OLR1	-0.701864	0.0236696
mRNAsi	AXL	-0.702478	0.0234946
mRNAsi	COLGALT1	-0.703072	0.0233263
mRNAsi	NCF2	-0.70488	0.0228186
mRNAsi	STXBP2	-0.705976	0.0225146
mRNAsi	KLF2	-0.708431	0.021844
mRNAsi	NR4A2	-0.708435	0.0218426
mRNAsi	IRS2	-0.710925	0.0211768
mRNAsi	IRAK2	-0.711017	0.0211524
mRNAsi	NDUFB1	-0.712575	0.0207431
mRNAsi	CD83	-0.712873	0.0206655
mRNAsi	FCGR2A	-0.718747	0.0191757
mRNAsi	NDUFB7	-0.720479	0.0187509
mRNAsi	FPR3	-0.721343	0.0185414
mRNAsi	LHFPL2	-0.722128	0.0183526
mRNAsi	GYPC	-0.722275	0.0183175
mRNAsi	RIN3	-0.723672	0.0179853
mRNAsi	PPP1R15A	-0.723729	0.0179716
mRNAsi	RNF19B	-0.729453	0.0166544
mRNAsi	SERPINB9	-0.734068	0.0156425
mRNAsi	NFKBIA	-0.735009	0.0154415
mRNAsi	SIGLEC7	-0.736553	0.0151158
mRNAsi	PNRC1	-0.740647	0.0142749
mRNAsi	KLF6	-0.744878	0.0134411
mRNAsi	TNFAIP8L3	-0.745142	0.0133903
mRNAsi	MAFF	-0.74568	0.013287
mRNAsi	EGR2	-0.747162	0.0130054
mRNAsi	ITGA5	-0.74865	0.0127269
mRNAsi	BIRC3	-0.750178	0.0124452
mRNAsi	CCL20	-0.750191	0.012443
mRNAsi	TBXAS1	-0.752608	0.0120065
mRNAsi	ALOX5AP	-0.756167	0.0113835
mRNAsi	SH3TC1	-0.7592	0.0108711
mRNAsi	COX6A1	-0.759525	0.0108171
mRNAsi	CXCL2	-0.760589	0.0106417
mRNAsi	TLR1	-0.764273	0.0100501
mRNAsi	CCRL2	-0.765309	0.00988803
mRNAsi	BNC2	-0.768053	0.00946772
mRNAsi	ITGAM	-0.768329	0.00942619
mRNAsi	BIRC2	-0.769429	0.00926172
mRNAsi	ID2	-0.772119	0.00886818
mRNAsi	IER2	-0.773566	0.00866137
mRNAsi	DSC2	-0.779109	0.00790096
mRNAsi	SELPLG	-0.781416	0.00759878
mRNAsi	SIK1	-0.783064	0.00738815
mRNAsi	ALKBH7	-0.785697	0.00705999
mRNAsi	HBEGF	-0.786247	0.00699286
mRNAsi	CMKLR1	-0.790252	0.00651719
mRNAsi	ZFP36	-0.791107	0.00641869
mRNAsi	EBI3	-0.792196	0.00629476
mRNAsi	ICAM4	-0.792345	0.00627788
mRNAsi	MYOF	-0.79359	0.00613862
mRNAsi	DUSP2	-0.795978	0.00587757
mRNAsi	ITPRIP	-0.79609	0.00586559
mRNAsi	DUSP5	-0.796693	0.00580106
mRNAsi	RGS1	-0.798144	0.00564778
mRNAsi	RAB20	-0.79837	0.0056242
mRNAsi	TCIRG1	-0.800199	0.00543567
mRNAsi	TNFAIP2	-0.800941	0.00536056
mRNAsi	STX11	-0.801645	0.00528993
mRNAsi	GRN	-0.808376	0.00464786
mRNAsi	KDM6B	-0.810301	0.00447495
mRNAsi	PTPRC	-0.811993	0.0043269
mRNAsi	PER1	-0.818934	0.00375582
mRNAsi	PTAFR	-0.819573	0.00370612
mRNAsi	COX5B	-0.820105	0.00366511
mRNAsi	THEMIS2	-0.820407	0.00364193
mRNAsi	CTSS	-0.822223	0.00350502
mRNAsi	SAT1	-0.824711	0.00332351
mRNAsi	IL1R2	-0.825208	0.00328804
mRNAsi	CTSZ	-0.826235	0.00321565
mRNAsi	SYNGR2	-0.826464	0.00319967
mRNAsi	PLA2G15	-0.827178	0.00315026
mRNAsi	GPR132	-0.830097	0.00295373
mRNAsi	METRNL	-0.832412	0.00280433
mRNAsi	RGS10	-0.833765	0.00271952
mRNAsi	PARVG	-0.837875	0.00247332
mRNAsi	DUSP1	-0.842508	0.00221557
mRNAsi	GADD45B	-0.843119	0.00218308
mRNAsi	GNA15	-0.84617	0.00202597
mRNAsi	MAP3K8	-0.849354	0.00187096
mRNAsi	NFKBIE	-0.849916	0.00184449
mRNAsi	PANX1	-0.850039	0.00183872
mRNAsi	SGK1	-0.85107	0.00179102
mRNAsi	NR4A1	-0.854931	0.00162032
mRNAsi	SLC31A2	-0.855527	0.00159505
mRNAsi	KLF4	-0.859355	0.00143957
mRNAsi	MFSD1	-0.860119	0.0014099
mRNAsi	LDLR	-0.864856	0.00123578
mRNAsi	RILPL2	-0.868342	0.00111801
mRNAsi	CLEC7A	-0.86905	0.00109514
mRNAsi	DRAM1	-0.873114	0.000970354
mRNAsi	PHLDA2	-0.874429	0.000932279
mRNAsi	ICOSLG	-0.875724	0.000895879
mRNAsi	B2M	-0.875833	0.000892845
mRNAsi	PTGS2	-0.880634	0.000767165
mRNAsi	NAMPT	-0.882712	0.000717001
mRNAsi	CDKN1A	-0.890239	0.000555117
mRNAsi	IFITM2	-0.895455	0.000459868
mRNAsi	SWAP70	-0.896815	0.000437146
mRNAsi	OSM	-0.903639	0.000335322
mRNAsi	VASP	-0.914416	0.000211465
mRNAsi	FOS	-0.926797	0.000114929

## Sheet: Sig. Correlation
	Core	Rim	Inv	5ALA-	5ALA+
TGM4	0.583546	-0.598063	0.0799466	0.851989	0.953539
FHL2	-0.263918	-0.189509	0.483237	0.706265	0.896449
THEGL	-0.310557	-0.537356	0.286377	-0.351311	0.866598
RELN	0.248241	0.623094	0.498685	0.831148	0.863264
SLITRK6	0.633817	0.198061	0.0339476	-0.060623	0.828379
LAMA3	-0.511284	-0.0308593	0.214321	0.740188	0.822772
ATP2B1	-0.471819	-0.0380188	0.59306	-0.836907	0.815066
MUC17	0.402911	-0.22489	0.717296	0.610713	0.810652
TPTE2P6	0.374405	0.601137	0.709274	-0.158495	0.802025
EHF	-0.302367	-0.108743	-0.233936	-0.576793	0.801379
LEKR1	0.330604	-0.0221544	-0.549751	0.884136	0.796127
UCP2	0.0892853	-0.567921	-0.863805	-0.884993	0.789313
CCDC178	0.0729744	0.374728	0.100336	-0.182757	0.784344
PLCXD3	-0.373976	0.338543	0.298473	-0.470951	0.771481
GNA14	-0.154212	-0.0394758	0.139356	-0.638503	0.770708
ABCA13	-0.446029	-0.326693	-0.57827	-0.456348	0.769623
ITGB6	-0.109645	-0.30067	0.272819	-0.406413	0.765623
XKR3	-0.40242	-0.278354	-0.602972	-0.142199	0.765161
IL6	-0.560596	-0.579981	-0.489601	-0.763479	0.763832
ENAM	-0.472601	0.195104	0.580698	0.904533	0.763121
PIGR	0.14188	-0.273076	-0.62865	-0.455906	0.756289
PCSK5	-0.688518	-0.869047	-0.272643	-0.706039	0.750533
PLS1	0.301162	0.219467	0.00601747	0.527433	0.745863
ANKRD20A5P	-0.0102904	0.62381	0.702895	-0.262242	0.740832
KLK10	0.0603522	0.312494	0.336834	0.00502923	0.739639
CLMP	-0.399509	-0.427263	0.0907065	-0.55953	0.735054
GJB3	-0.35341	-0.271174	0.803968	-0.448265	0.730081
PTPRQ	-0.207993	-0.373547	0.114586	-0.108134	0.729166
IL31RA	-0.189619	0.328684	-0.361877	0.00950019	0.724105
BTBD11	-0.323079	-0.141419	0.671036	-0.547418	0.723225
PNOC	0.0419174	0.614615	0.58192	-0.457584	0.722755
NMUR1	-0.491571	-0.0772638	-0.205462	-0.342236	0.699518
NDST3	0.0780004	0.477742	0.720694	-0.347072	0.696117
ALPK2	-0.311828	-0.704373	-0.0628077	-0.524444	0.676255
TOR4A	-0.663208	-0.738587	-0.836055	-0.666218	0.669612
ABI3BP	0.05631	0.376056	-0.444275	-0.137927	0.657472
ANO2	-0.246658	0.291388	-0.228636	-0.250108	0.65523
RBFOX3	0.130963	0.614422	0.692462	-0.428295	0.637767
RYR2	0.0104397	0.48056	0.360193	0.60817	0.635319
